# Supplementary material
Source: PubMed Central journal article supplement (PMC2749706)
Supplement: NIHMS120473-supplement-2_si_002.pdf [file NIHMS120473-supplement-2_si_002.pdf]

***Supporting Information***  
**<sup>1</sup>H and <sup>13</sup>C NMR Spectra**

**One-Pot Multicomponent Coupling Methods for  
the Synthesis of Diastereo- and Enantioenriched  
(*Z*)-Trisubstituted Allylic Alcohols**

*Michael H. Kerrigan, Sang-Jin Jeon, Young K. Chen, Luca Salvi, Patrick J. Carroll,  
and  
Patrick J. Walsh\**

Contributions from the P. Roy and Diana T. Vagelos Laboratories, Department of  
Chemistry, University of Pennsylvania, 231 South 34th Street, Philadelphia,

Pennsylvania 19104-6323

[pwalsh@sas.upenn.edu](mailto:pwalsh@sas.upenn.edu)

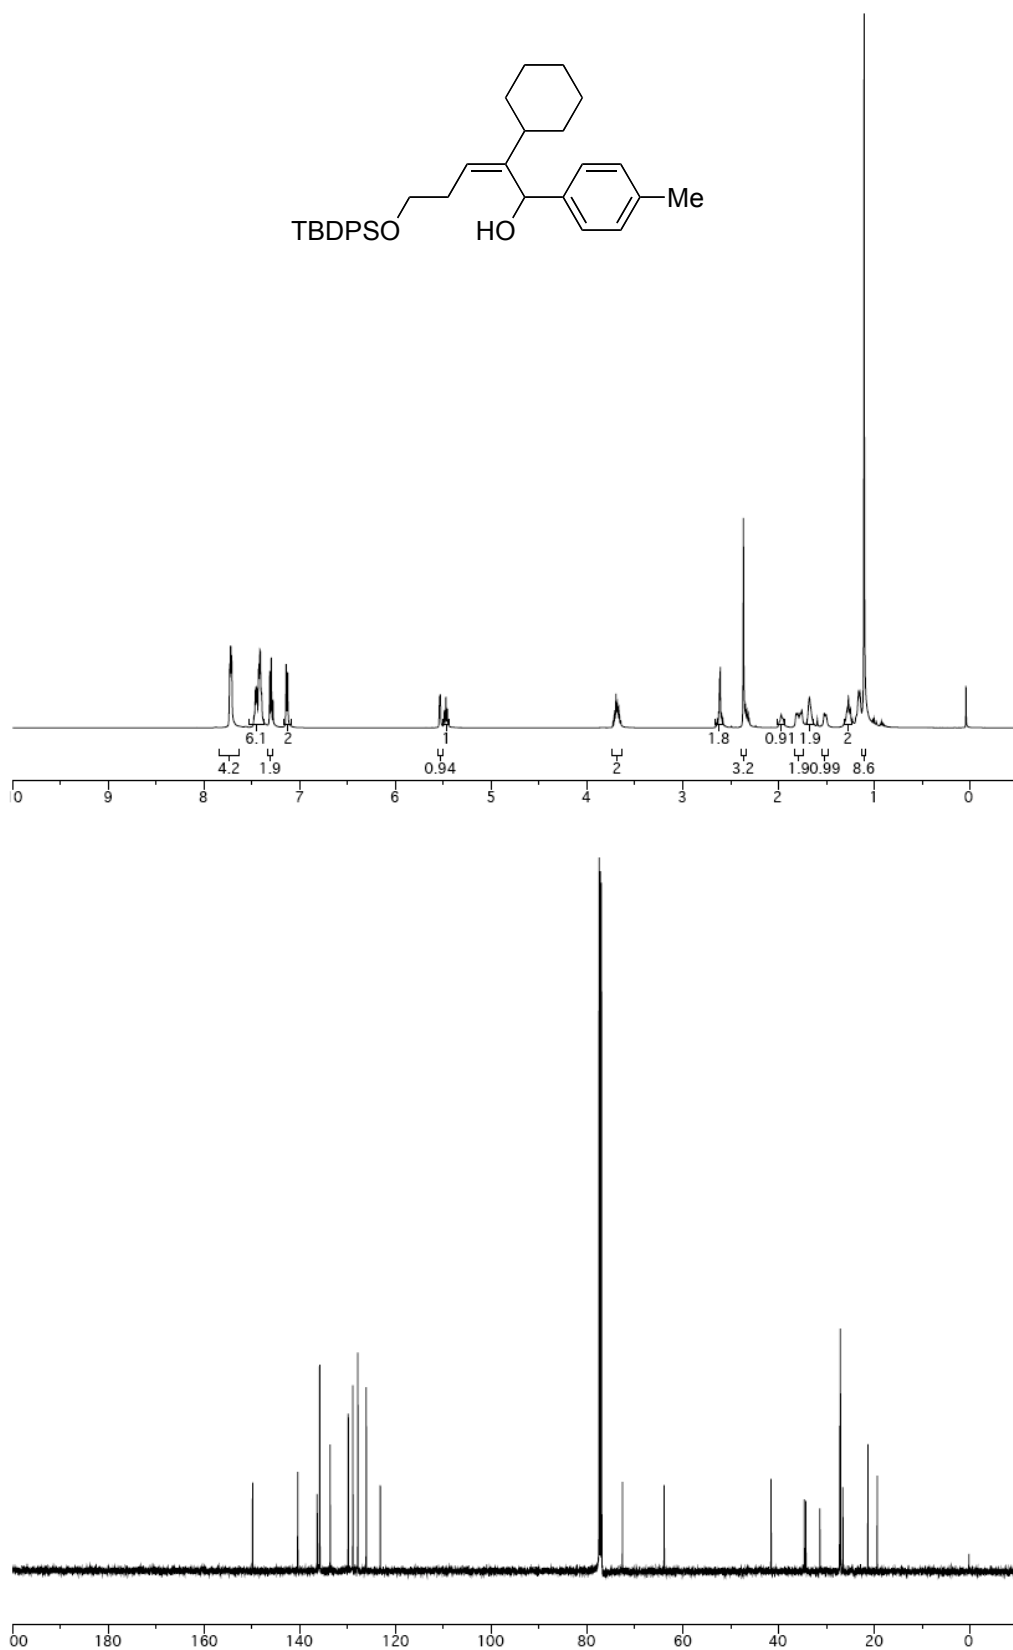

**Figure SI- Table 2.** 500 MHz  $^1\text{H}$  and  $^{125}\text{C}\{^1\text{H}\}$  NMR of Cyclohexyl in  $\text{CDCl}_3$ .

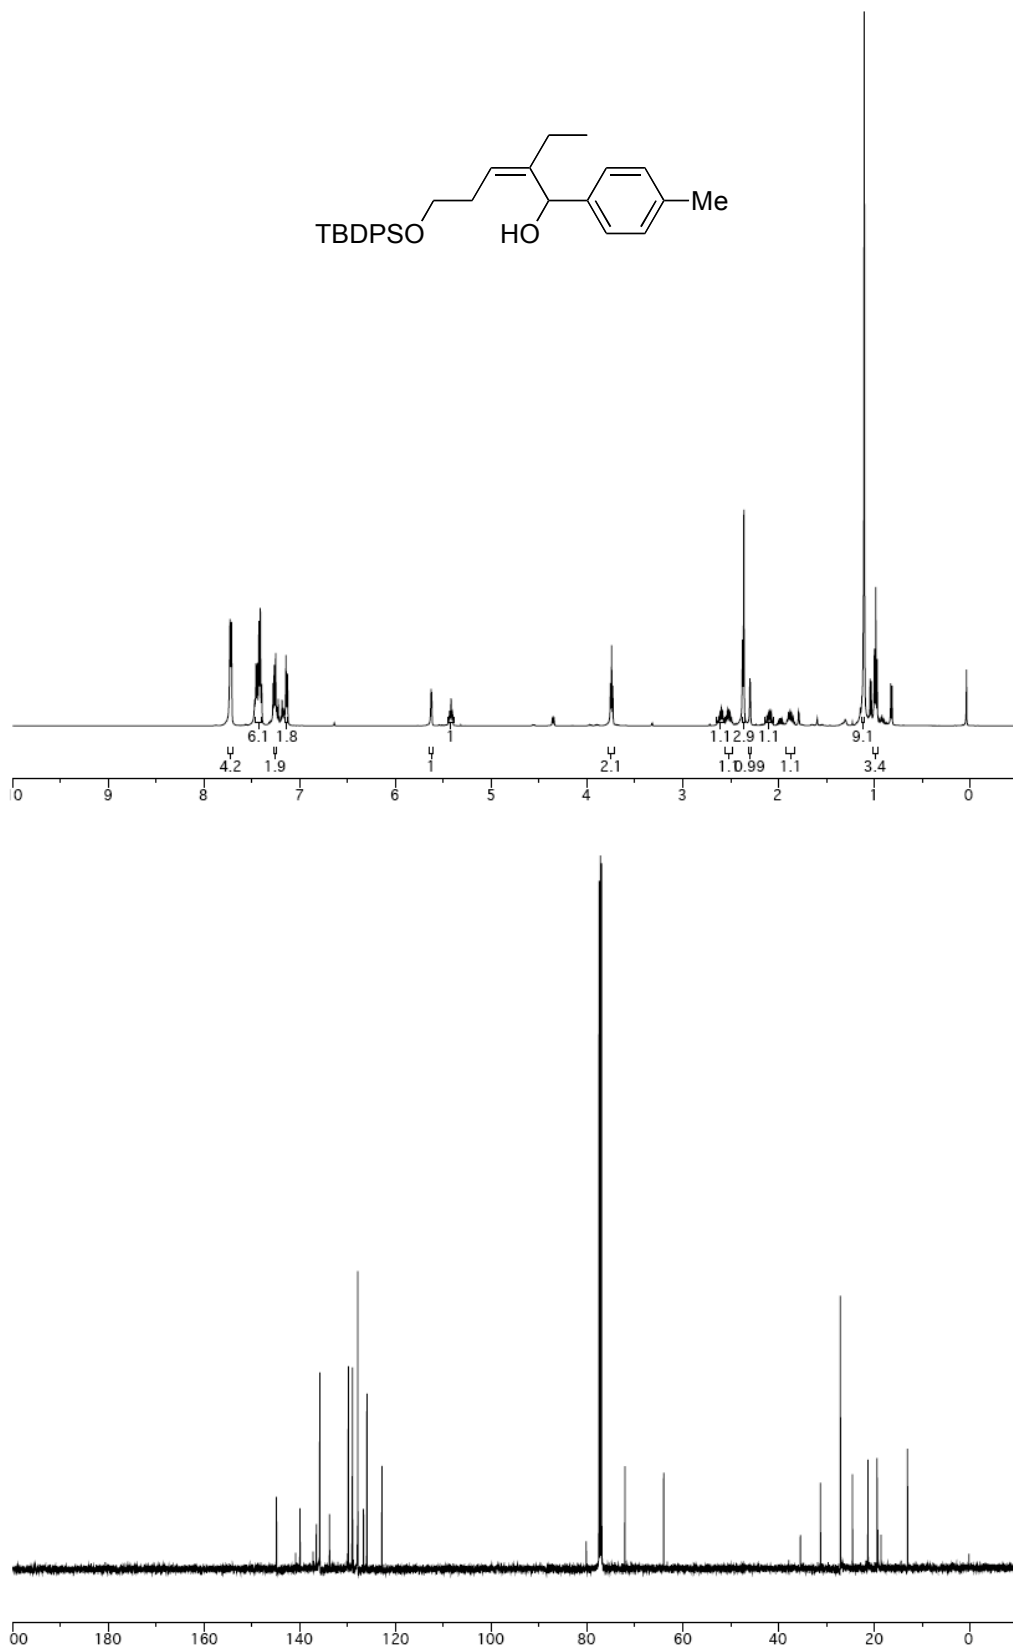

**Figure SI- Table 2.** 500 MHz  $^1\text{H}$  and 125  $^{13}\text{C}\{^1\text{H}\}$  NMR of Ethyl in  $\text{CDCl}_3$ .

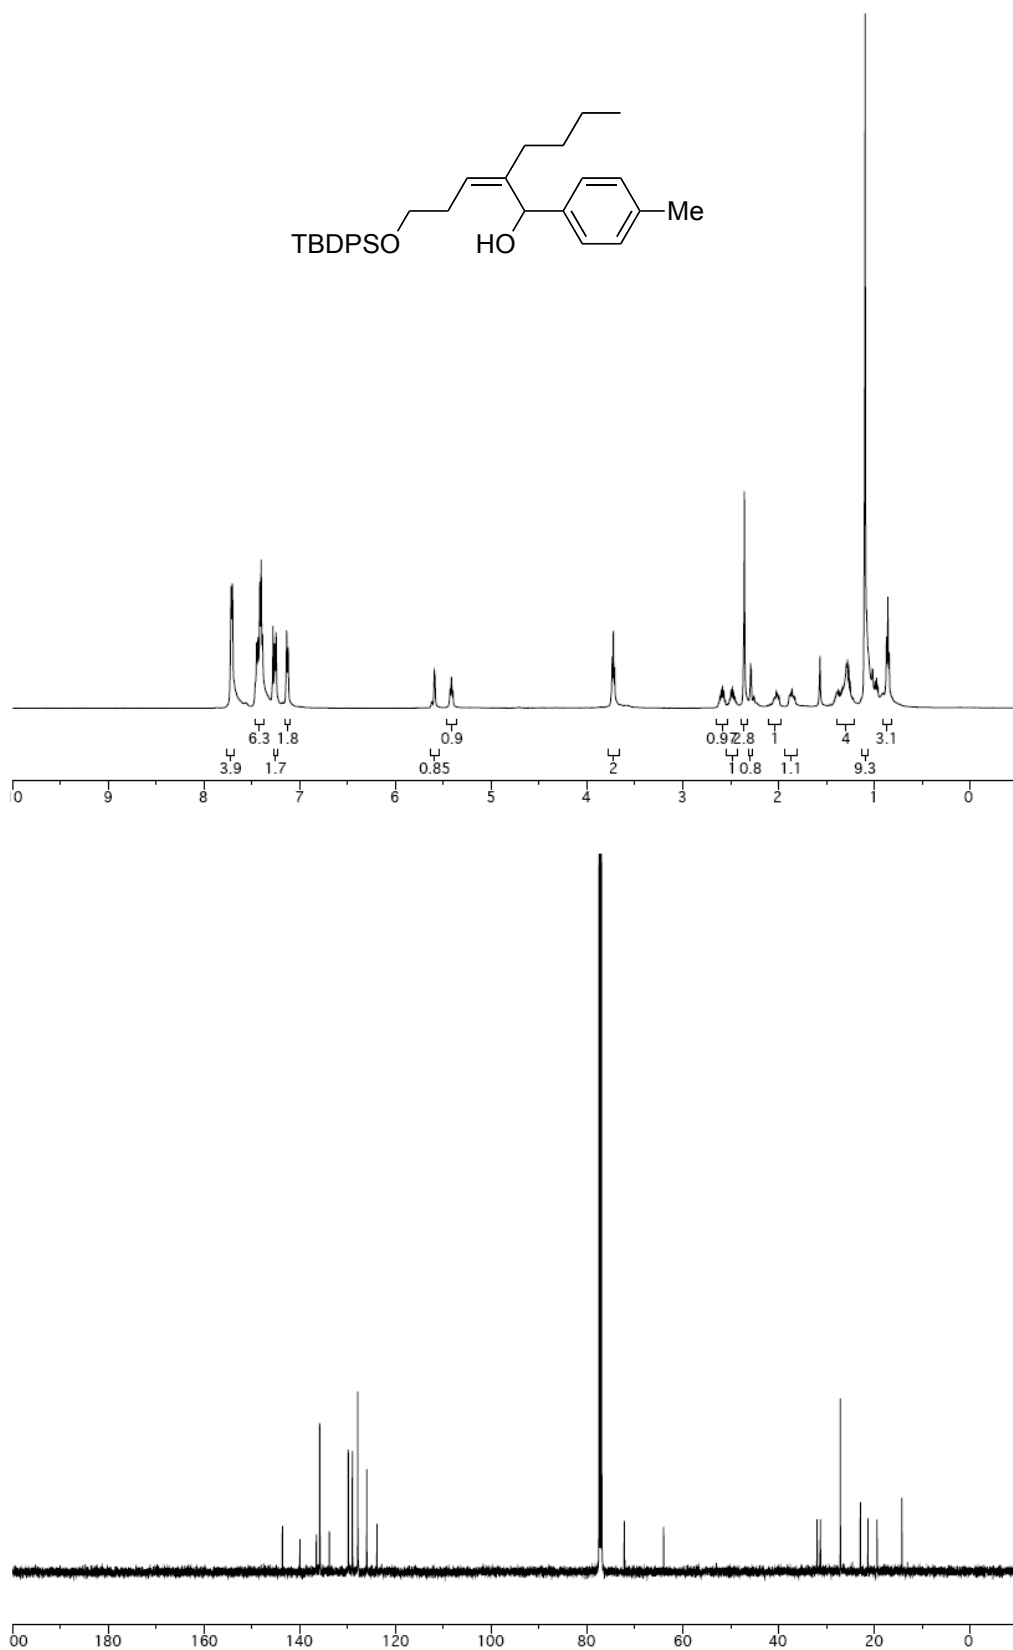

**Figure SI- Table 2.** 500 MHz <sup>1</sup>H and 125 <sup>13</sup>C{<sup>1</sup>H} NMR of Butyl in CDCl<sub>3</sub>.

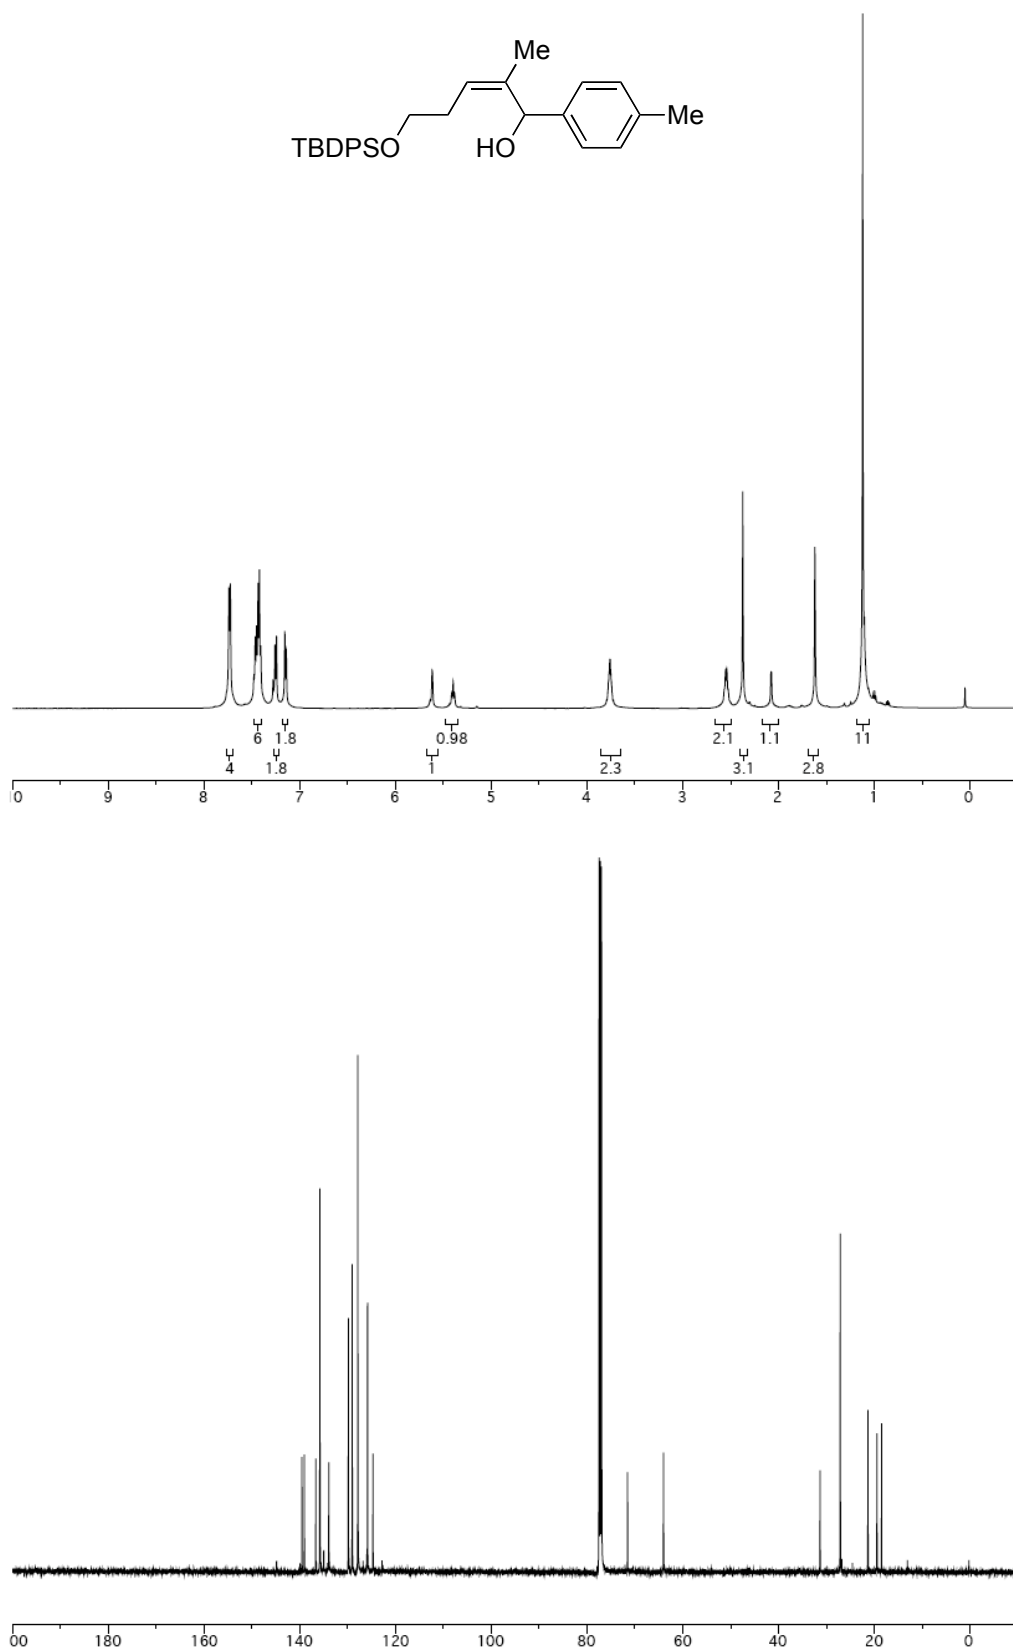

**Figure SI- Table 2.** 500 MHz  $^1\text{H}$  and 125  $^{13}\text{C}\{^1\text{H}\}$  NMR of Methyl in  $\text{CDCl}_3$ .

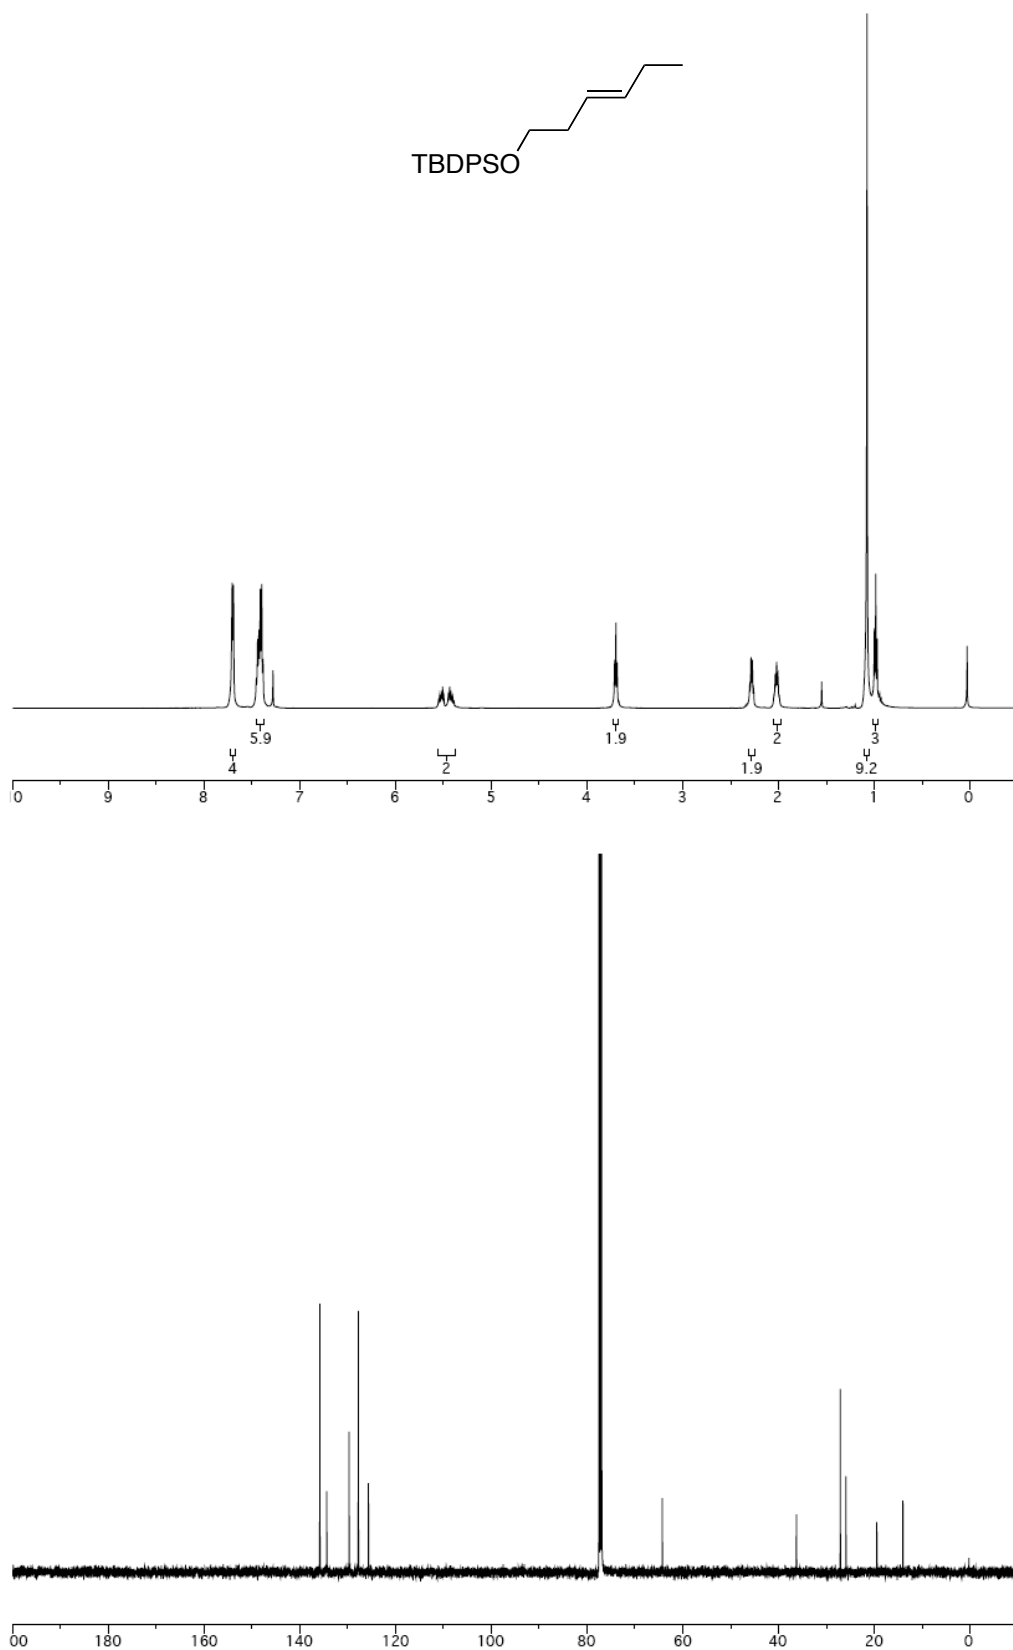

**Figure SI- Scheme 7.** 500 MHz  $^1\text{H}$  and 125  $^{13}\text{C}\{^1\text{H}\}$  NMR of Vinyl Ethyl in  $\text{CDCl}_3$ .

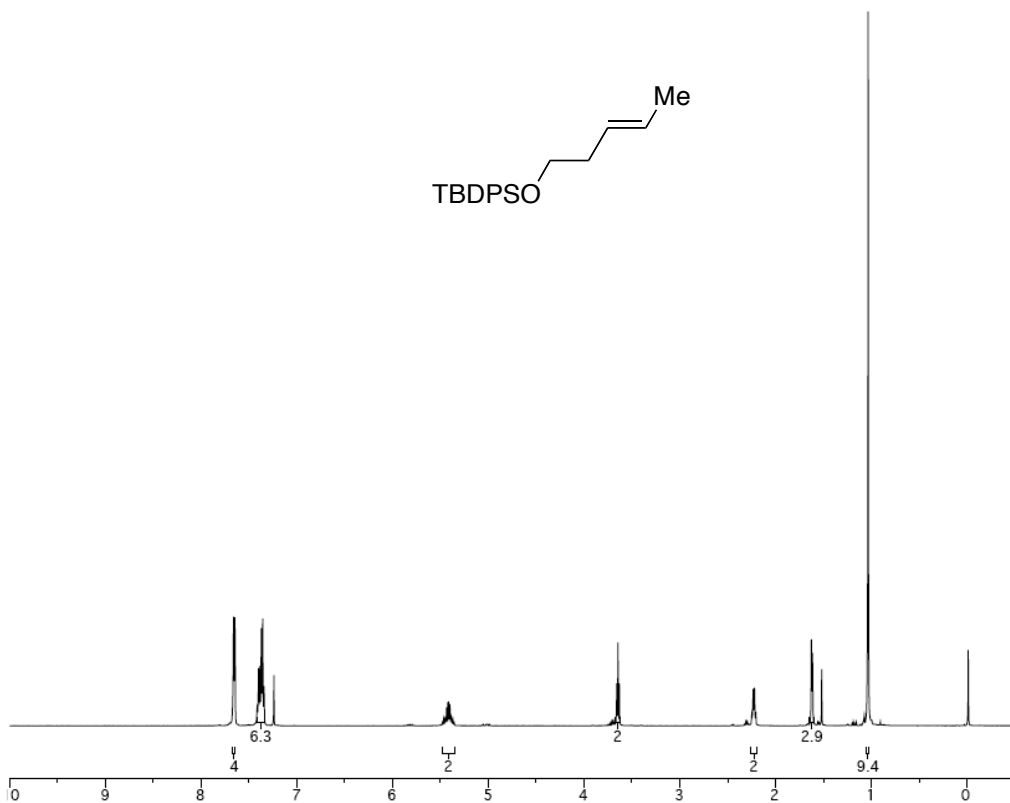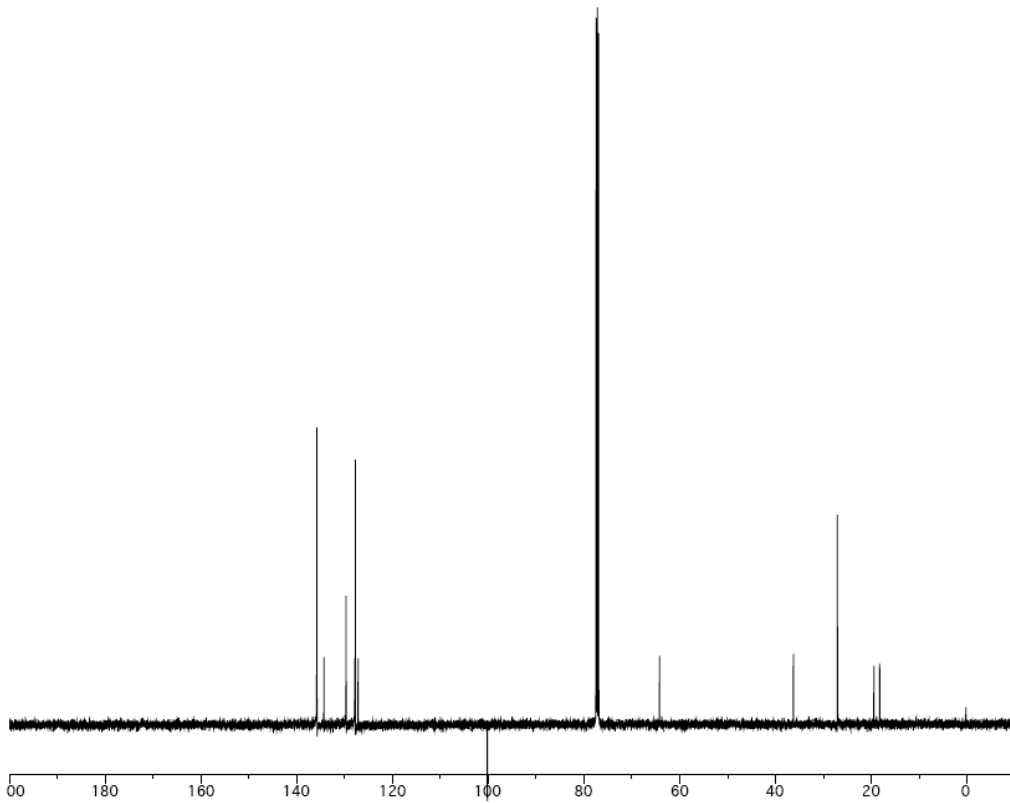

**Figure SI- Scheme 7.** 500 MHz  $^1\text{H}$  and  $125\ ^{13}\text{C}\{^1\text{H}\}$  NMR of Vinyl Methyl in  $\text{CDCl}_3$ .

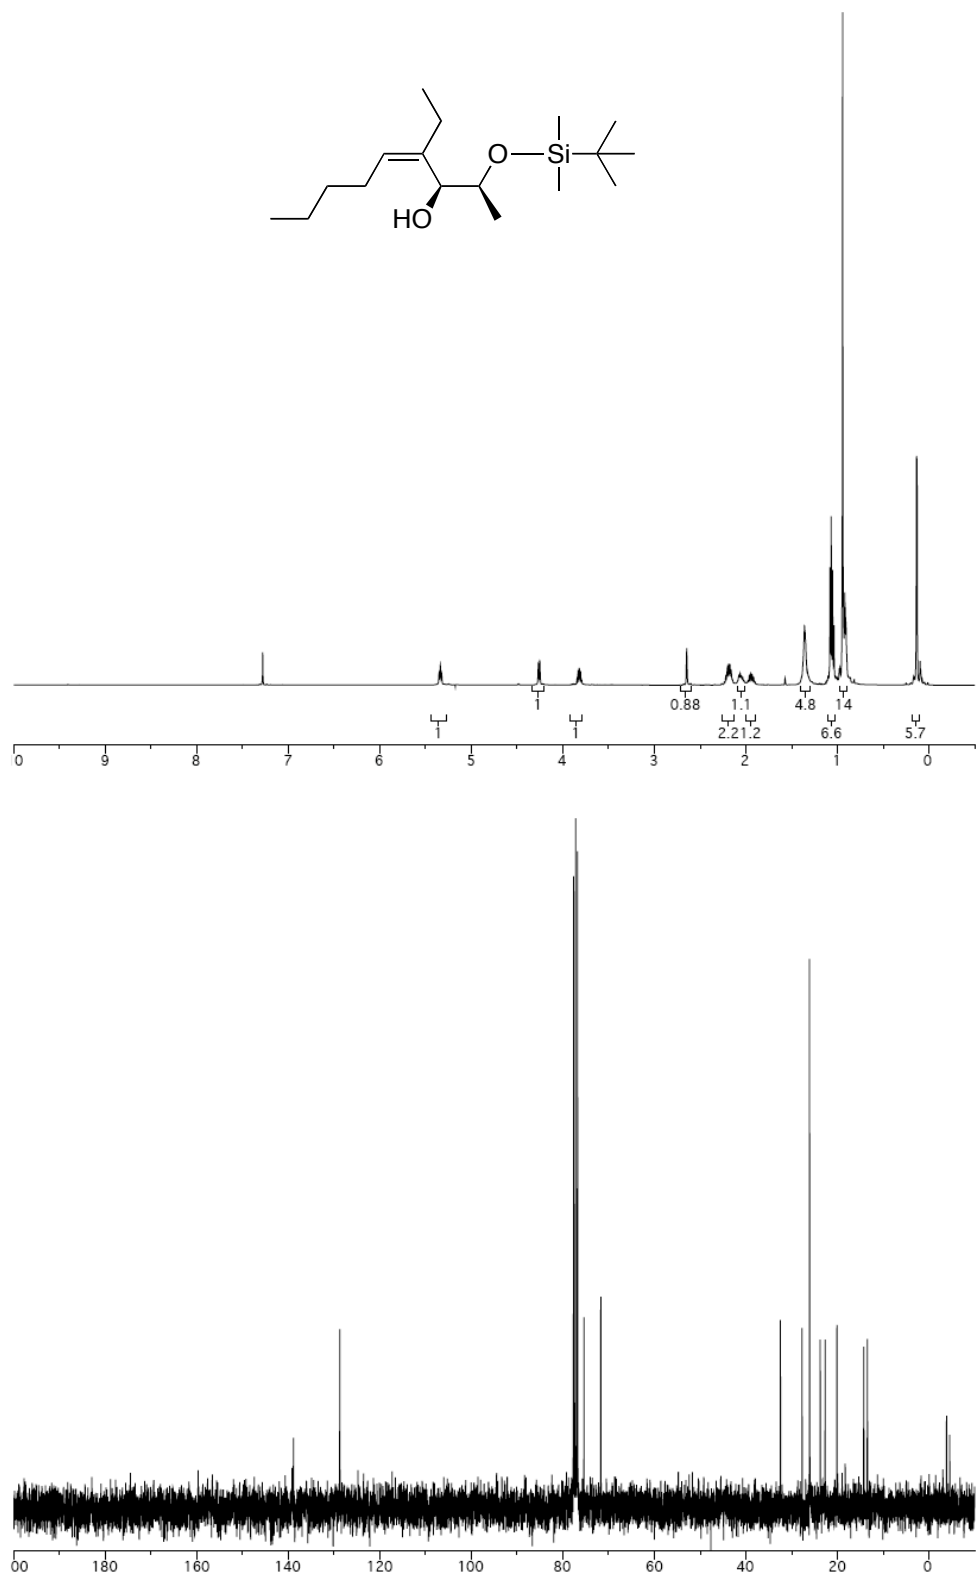

**Figure SI-1.** 500 MHz <sup>1</sup>H and 125 MHz <sup>13</sup>C {<sup>1</sup>H} NMR of **19** in CDCl<sub>3</sub>.



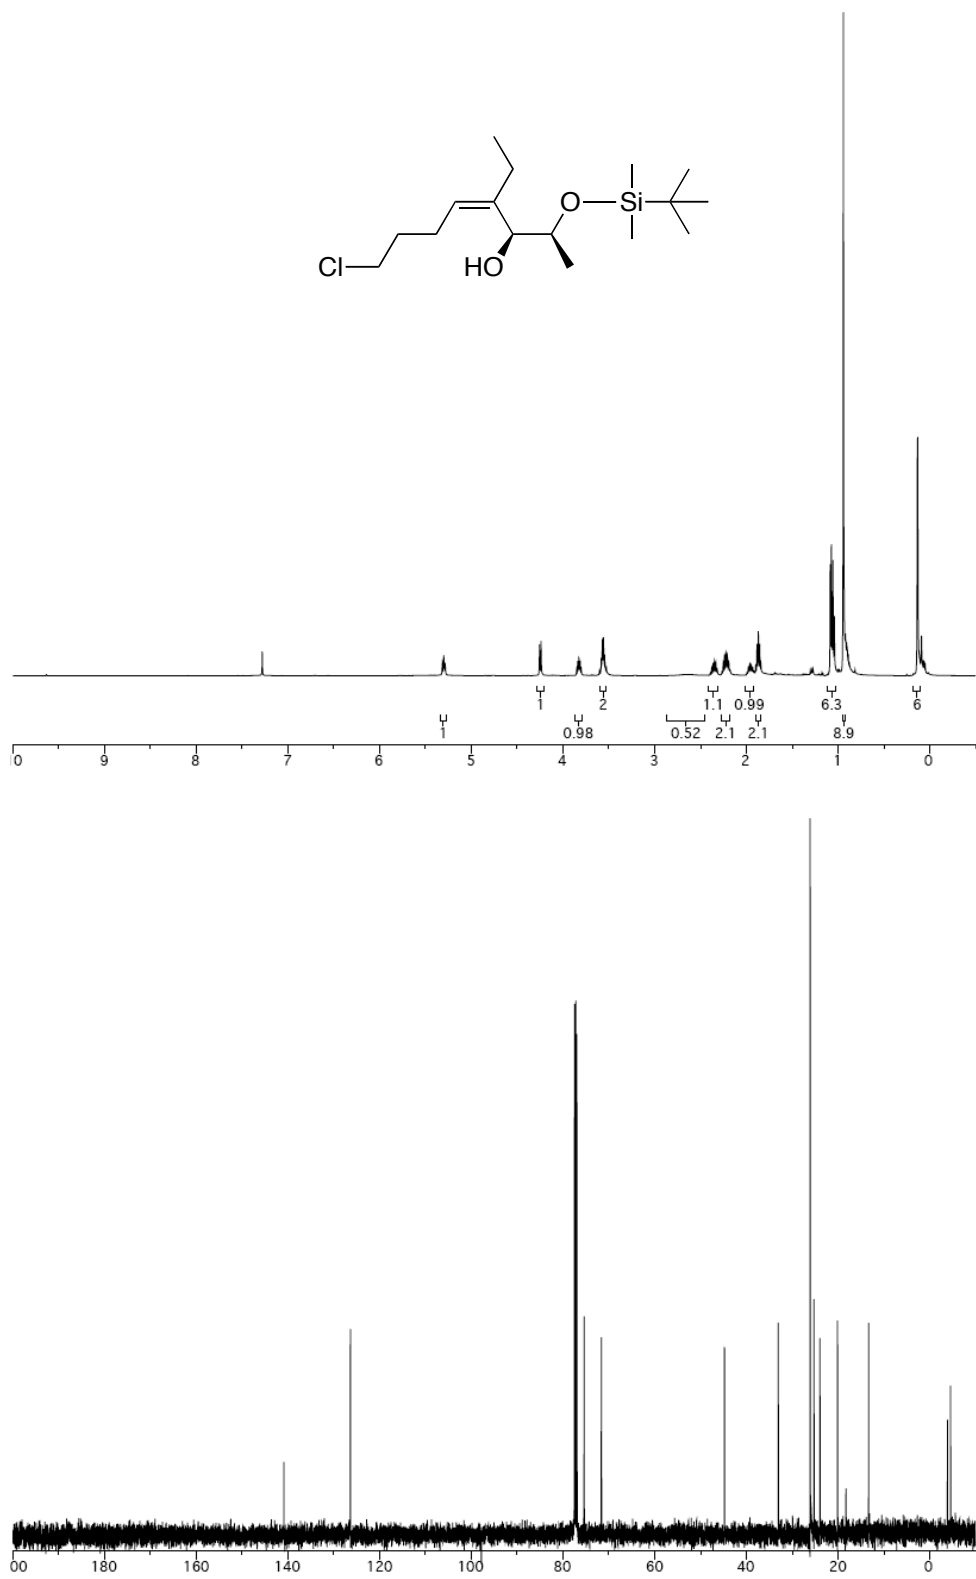

**Figure SI-2.** 500 MHz  $^1\text{H}$  and 125 MHz  $^{13}\text{C}$   $\{^1\text{H}\}$  NMR of **20** in  $\text{CDCl}_3$ .

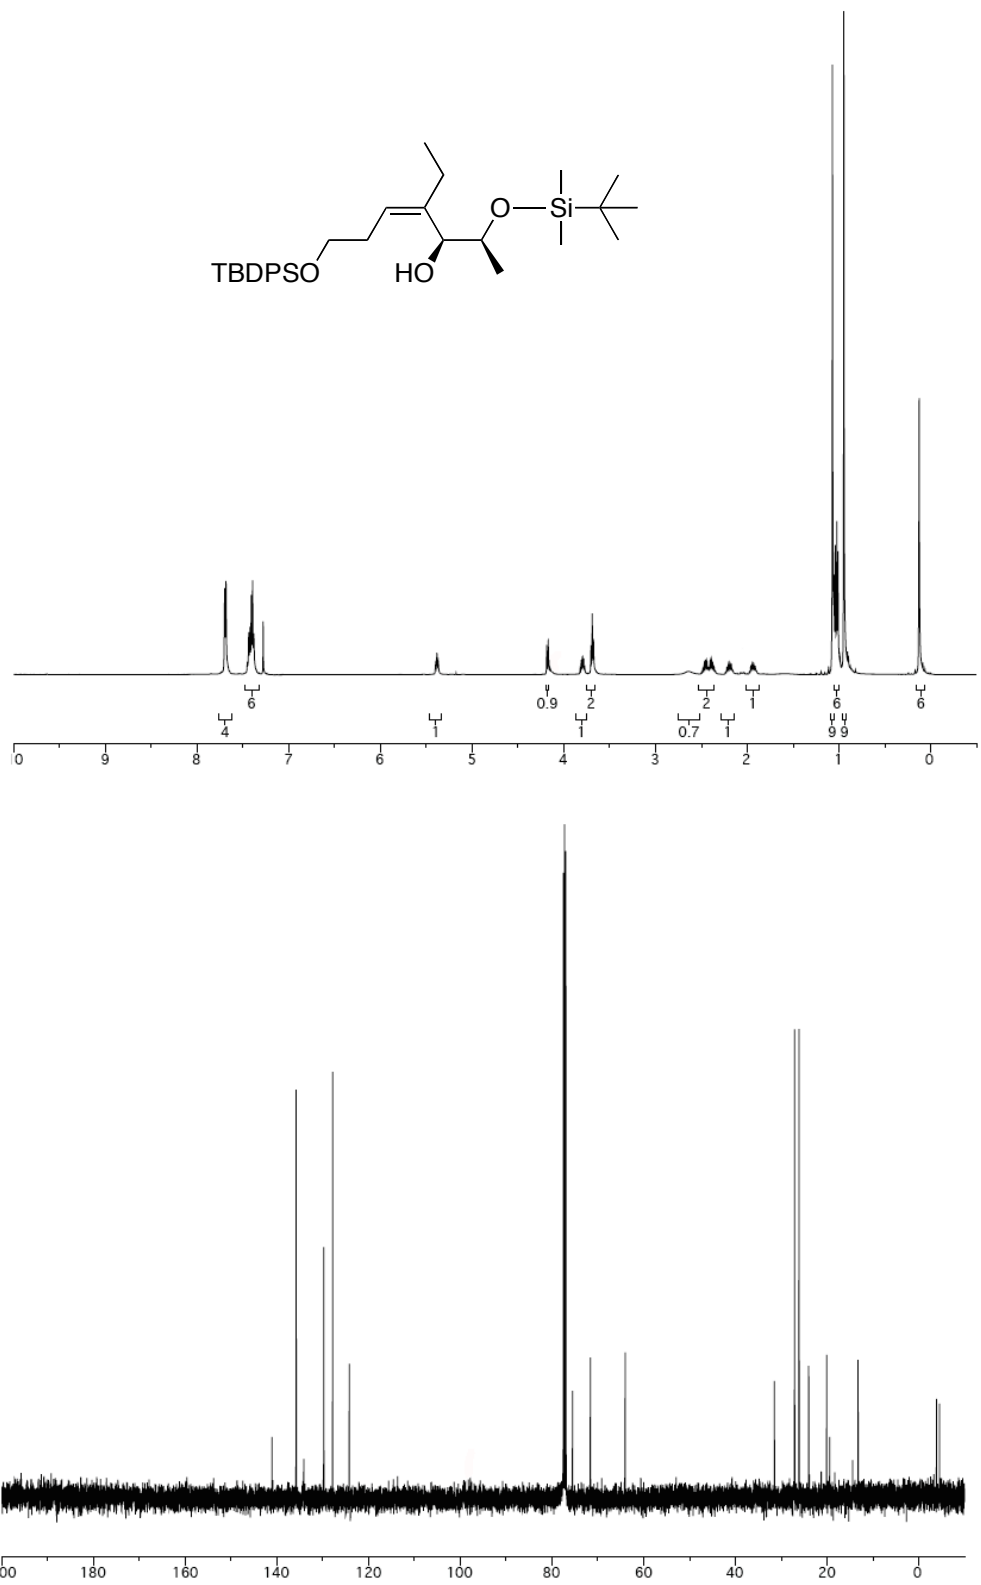

**Figure SI-3.** 500 MHz  $^1\text{H}$  and 125 MHz  $^{13}\text{C}$   $\{^1\text{H}\}$  NMR of **21** in  $\text{CDCl}_3$ .

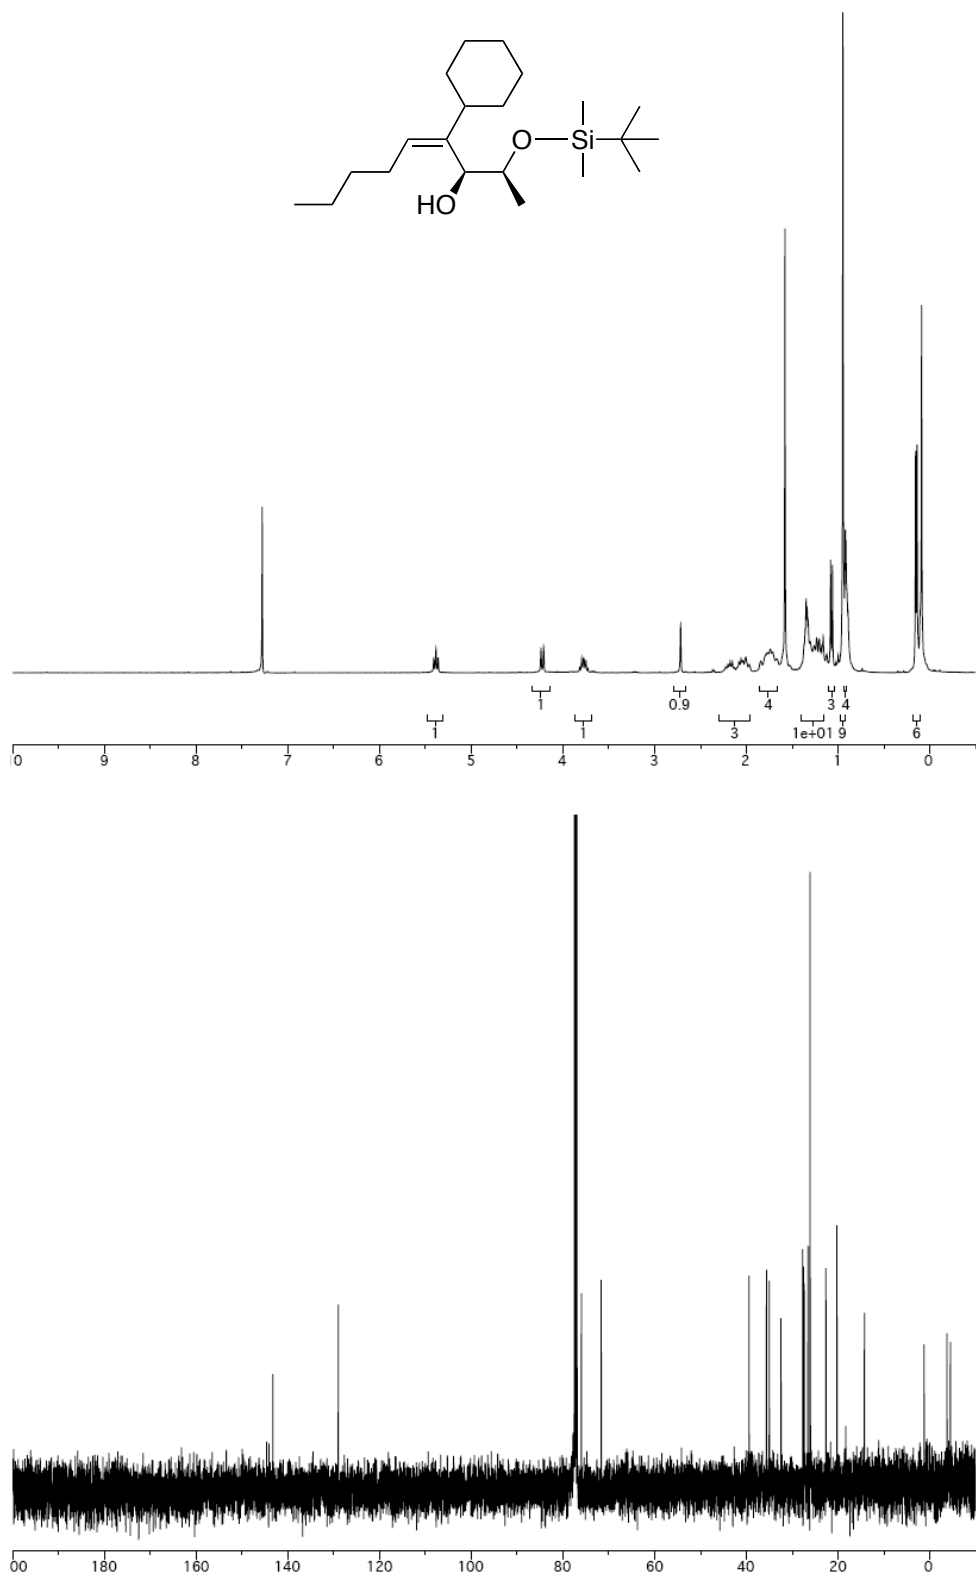

**Figure SI-4.** 500 MHz  $^1\text{H}$  and 125 MHz  $^{13}\text{C}$   $\{^1\text{H}\}$  NMR of **22** in  $\text{CDCl}_3$ .

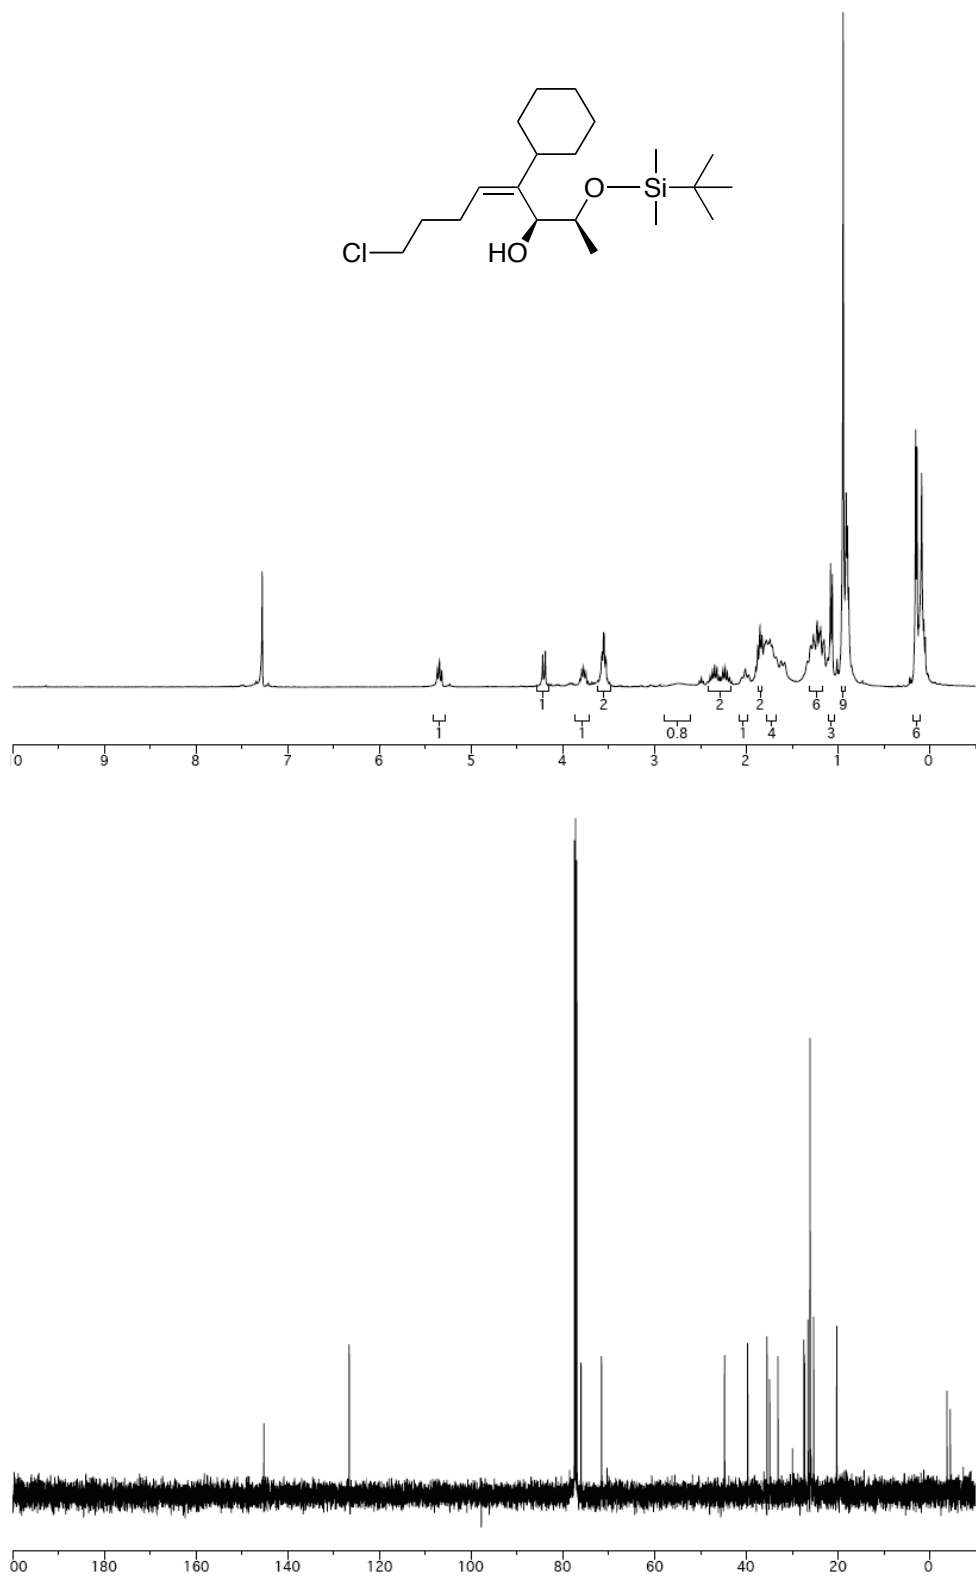

**Figure SI-5.** 500 MHz  $^1\text{H}$  and 125 MHz  $^{13}\text{C}$   $\{^1\text{H}\}$  NMR of **23** in  $\text{CDCl}_3$ .

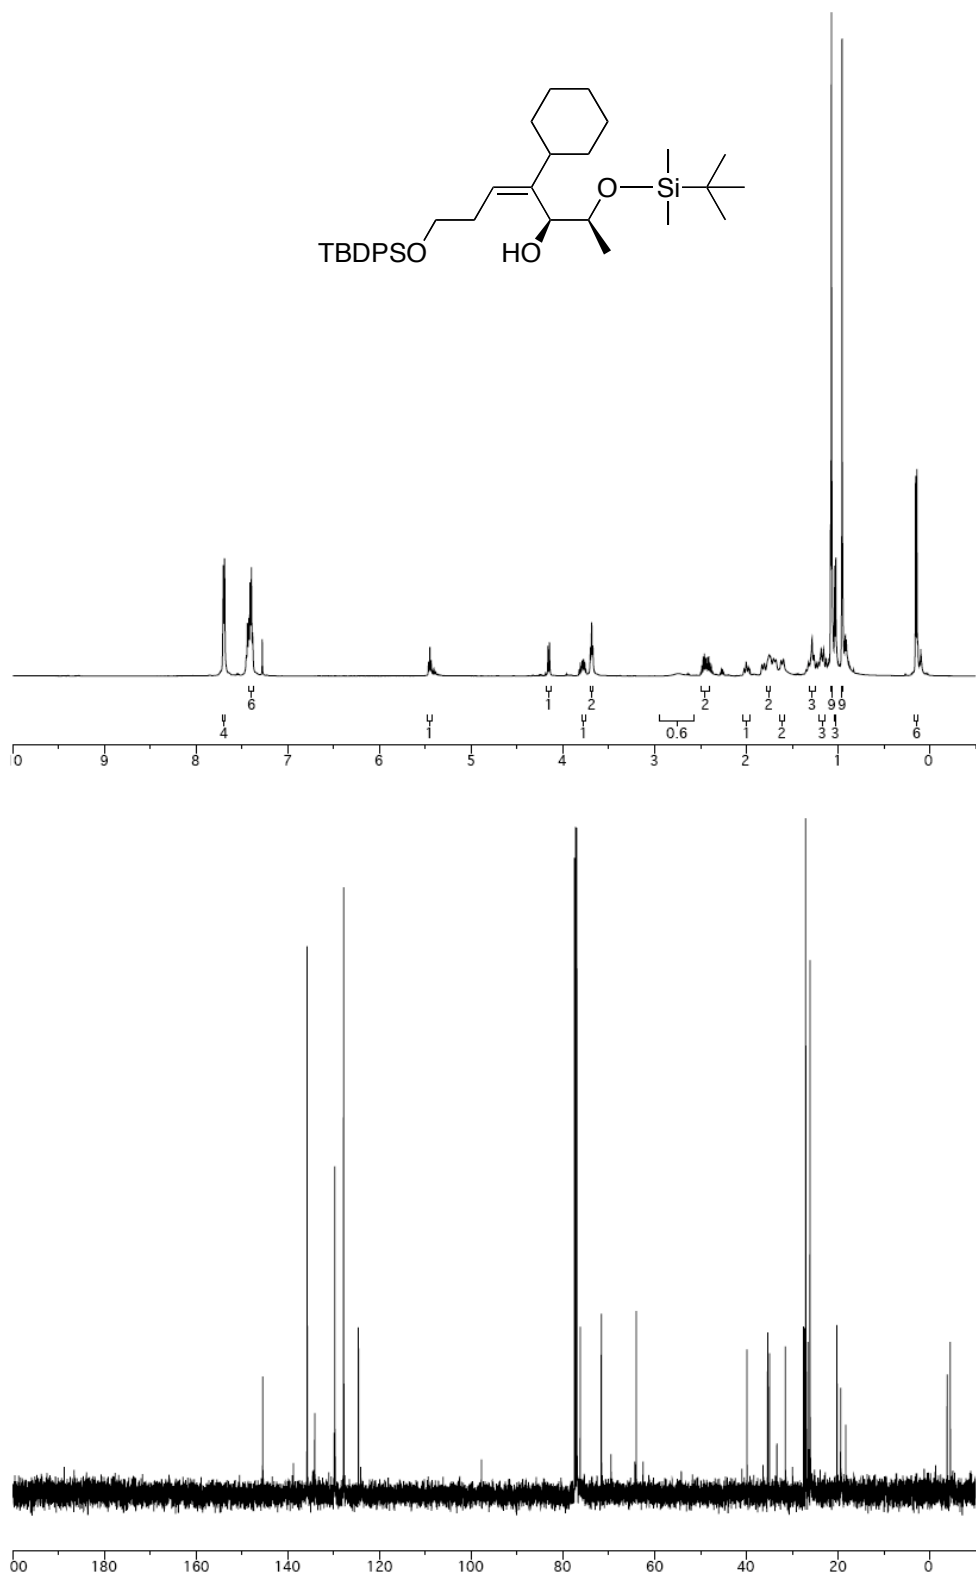

**Figure SI-6.** 500 MHz  $^1\text{H}$  and 125 MHz  $^{13}\text{C}$   $\{^1\text{H}\}$  NMR of **24** in  $\text{CDCl}_3$ .

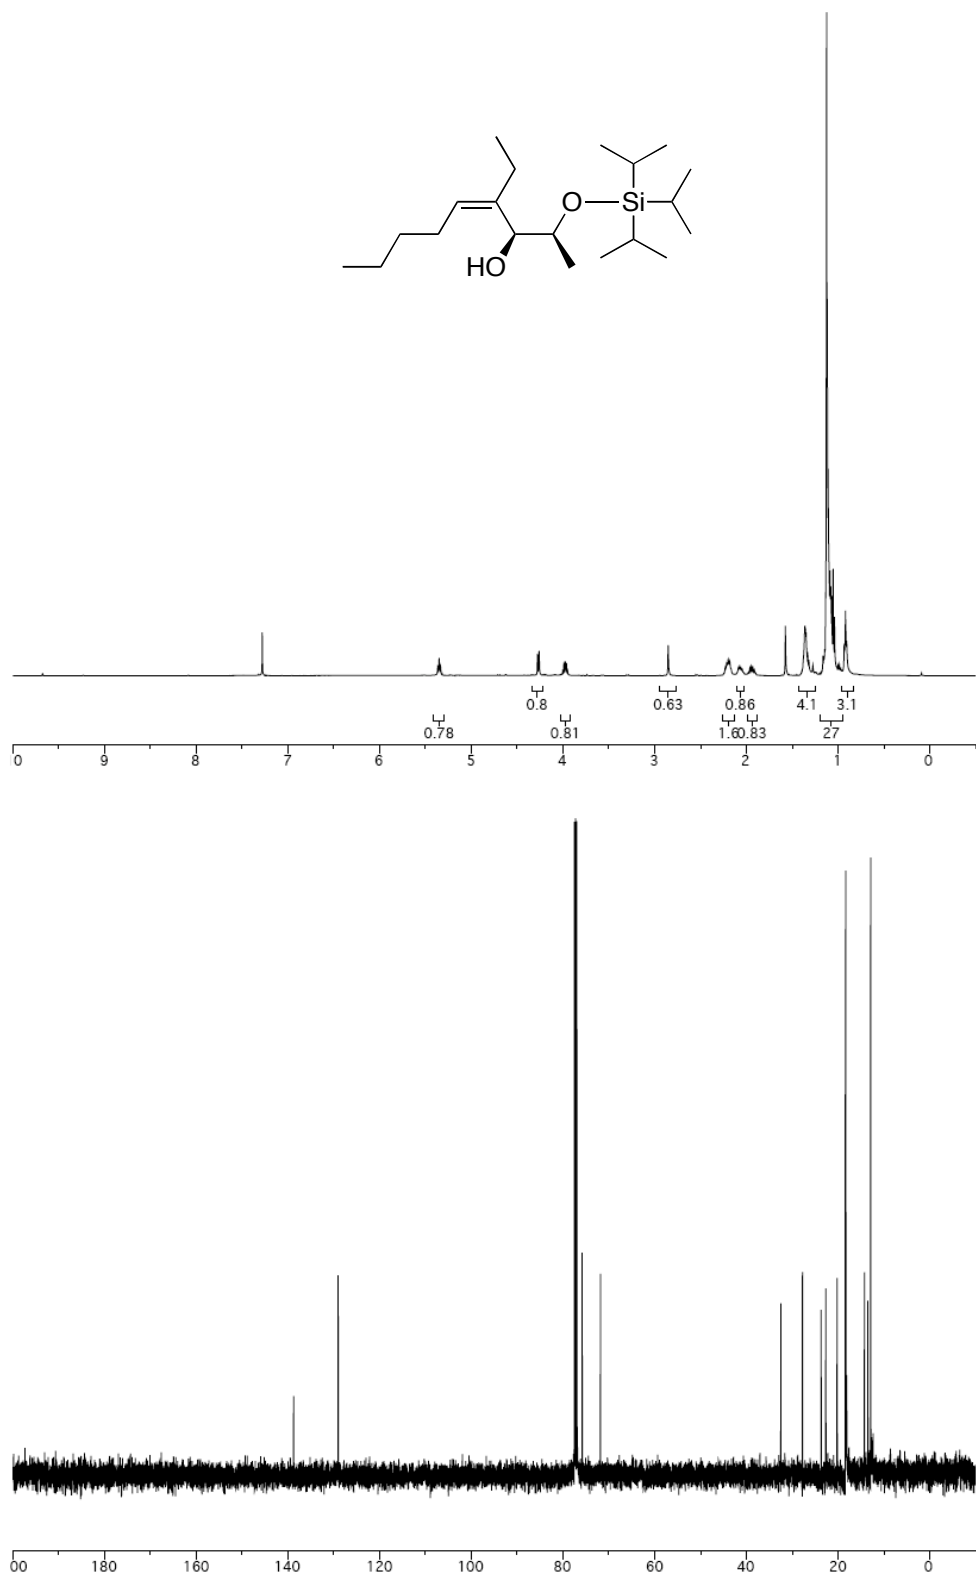

**Figure SI-7.** 500 MHz <sup>1</sup>H and 125 MHz <sup>13</sup>C {<sup>1</sup>H} NMR of **25** in CDCl<sub>3</sub>.

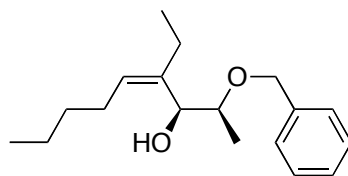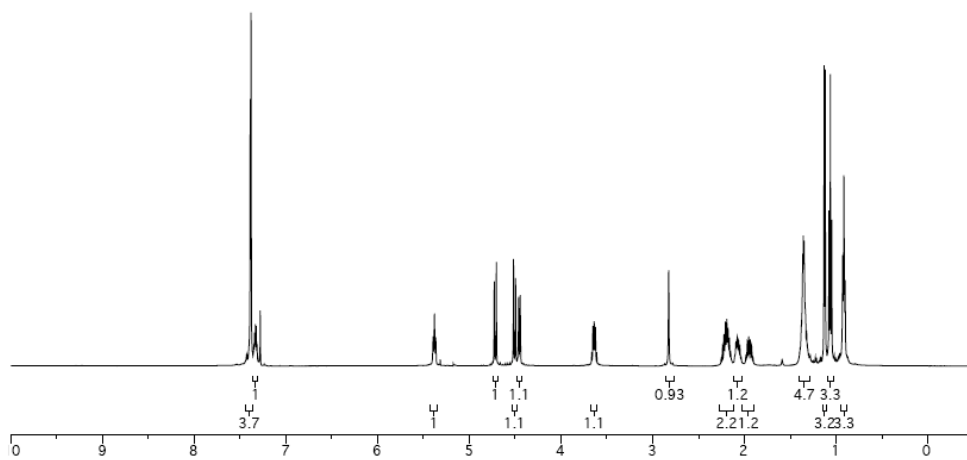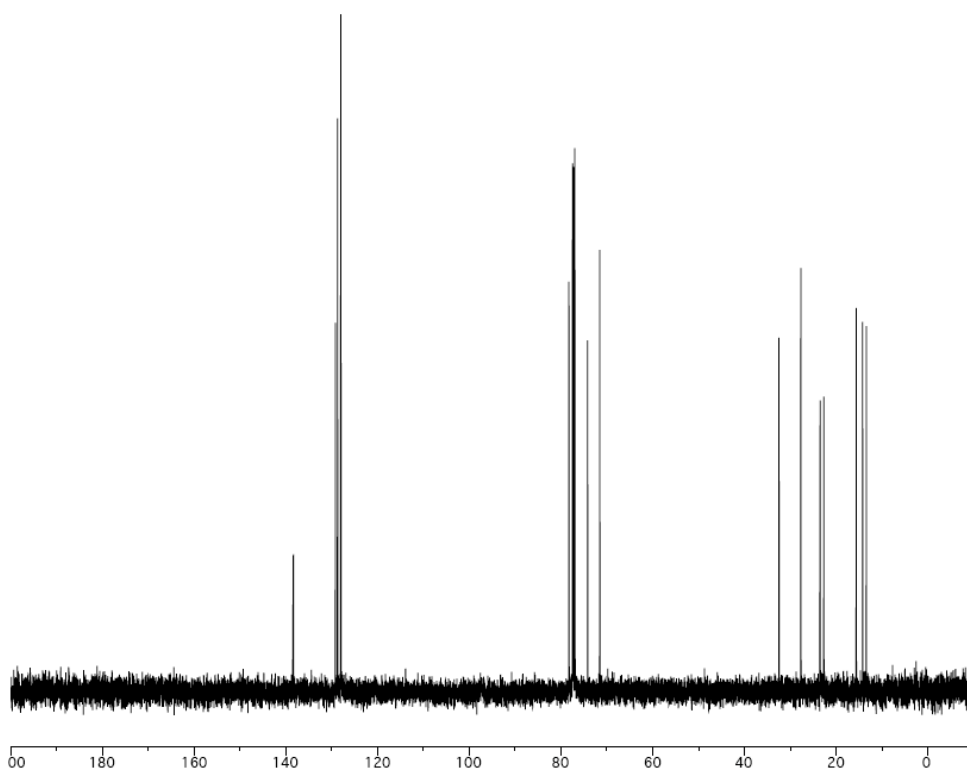

**Figure SI-8.** 500 MHz  $^1\text{H}$  and 125 MHz  $^{13}\text{C}$   $\{^1\text{H}\}$  NMR of **26** in  $\text{CDCl}_3$ .

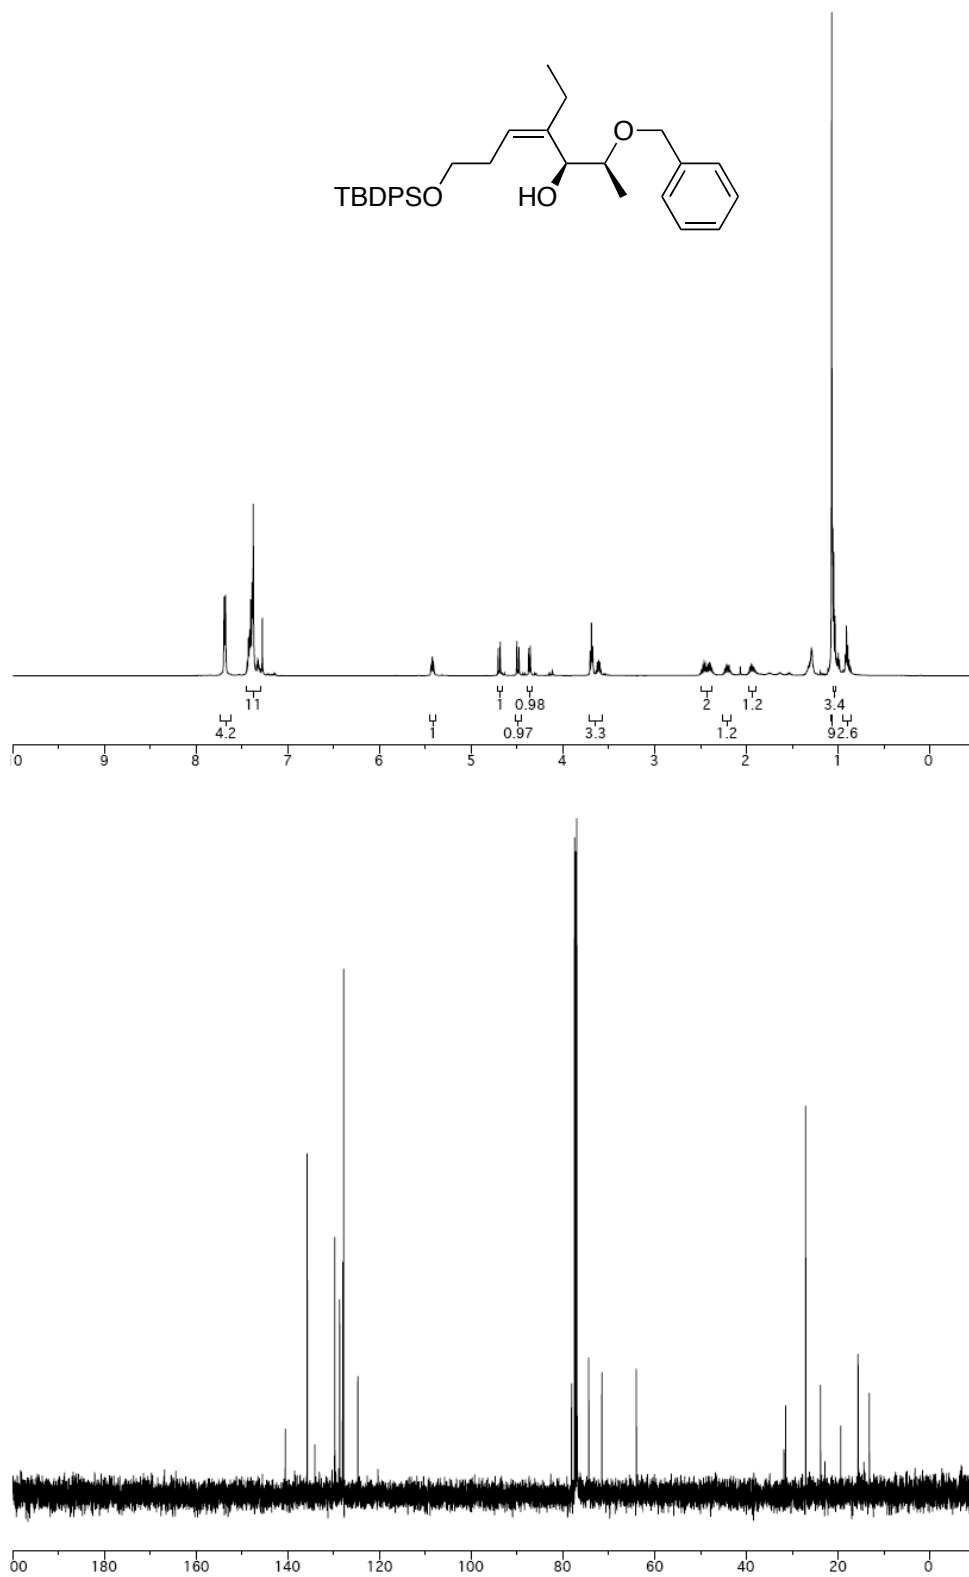

**Figure SI-9.** 500 MHz  $^1\text{H}$  and 125 MHz  $^{13}\text{C}$   $\{^1\text{H}\}$  NMR of **27** in  $\text{CDCl}_3$ .



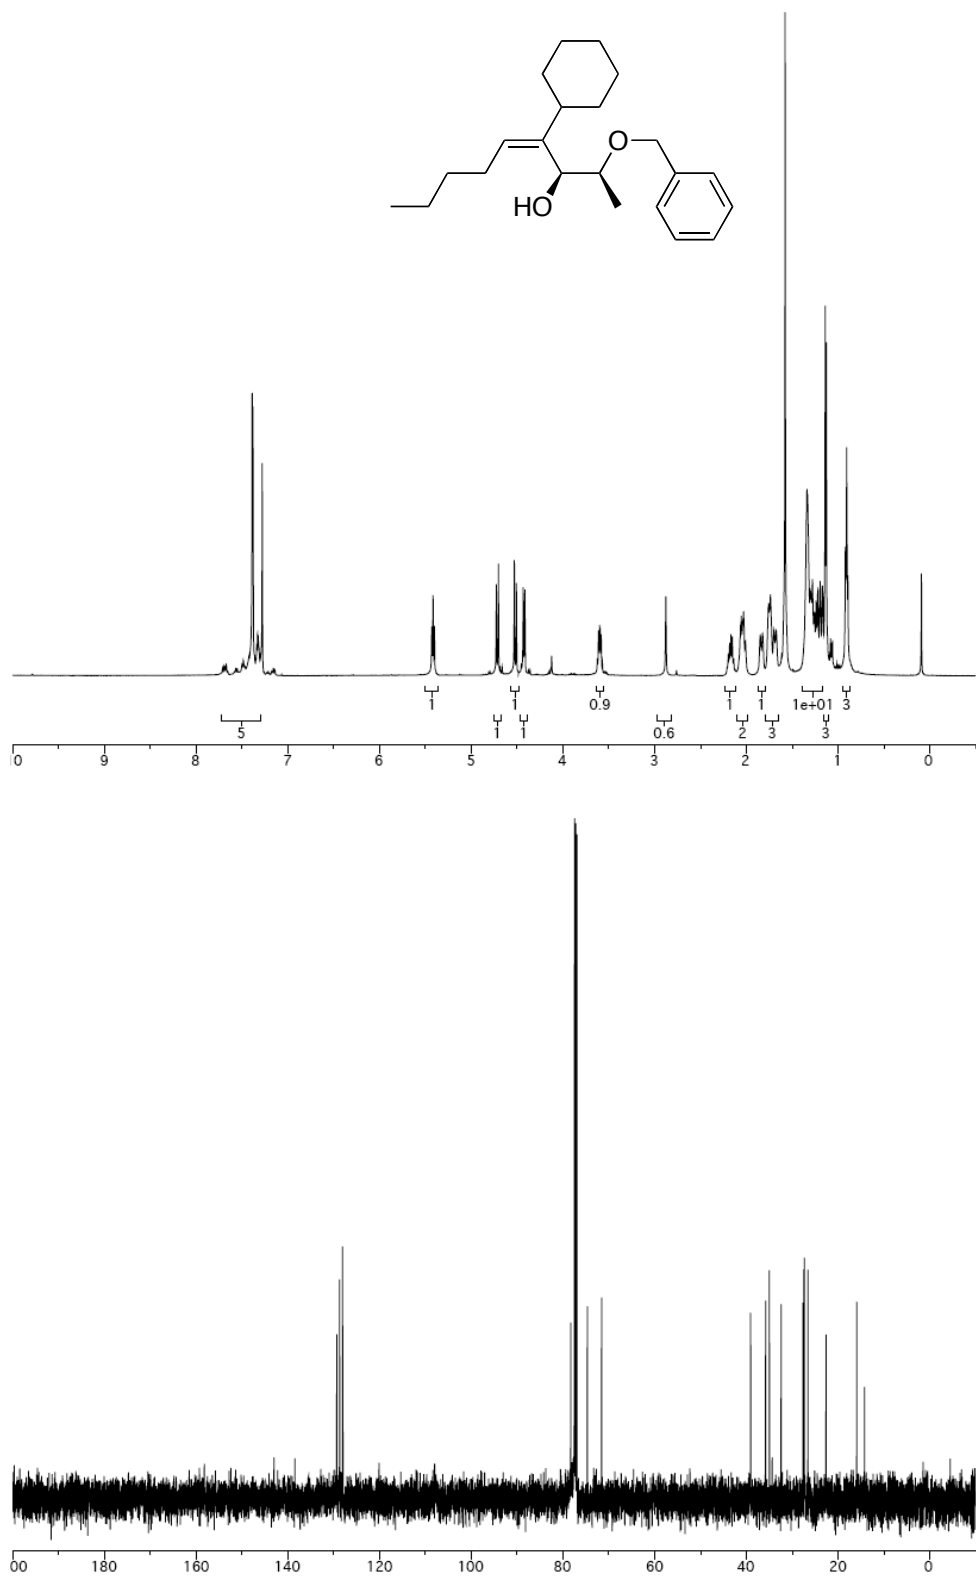

**Figure SI-10.** 500 MHz  $^1\text{H}$  and 125 MHz  $^{13}\text{C}$   $\{^1\text{H}\}$  NMR of **28** in  $\text{CDCl}_3$ .

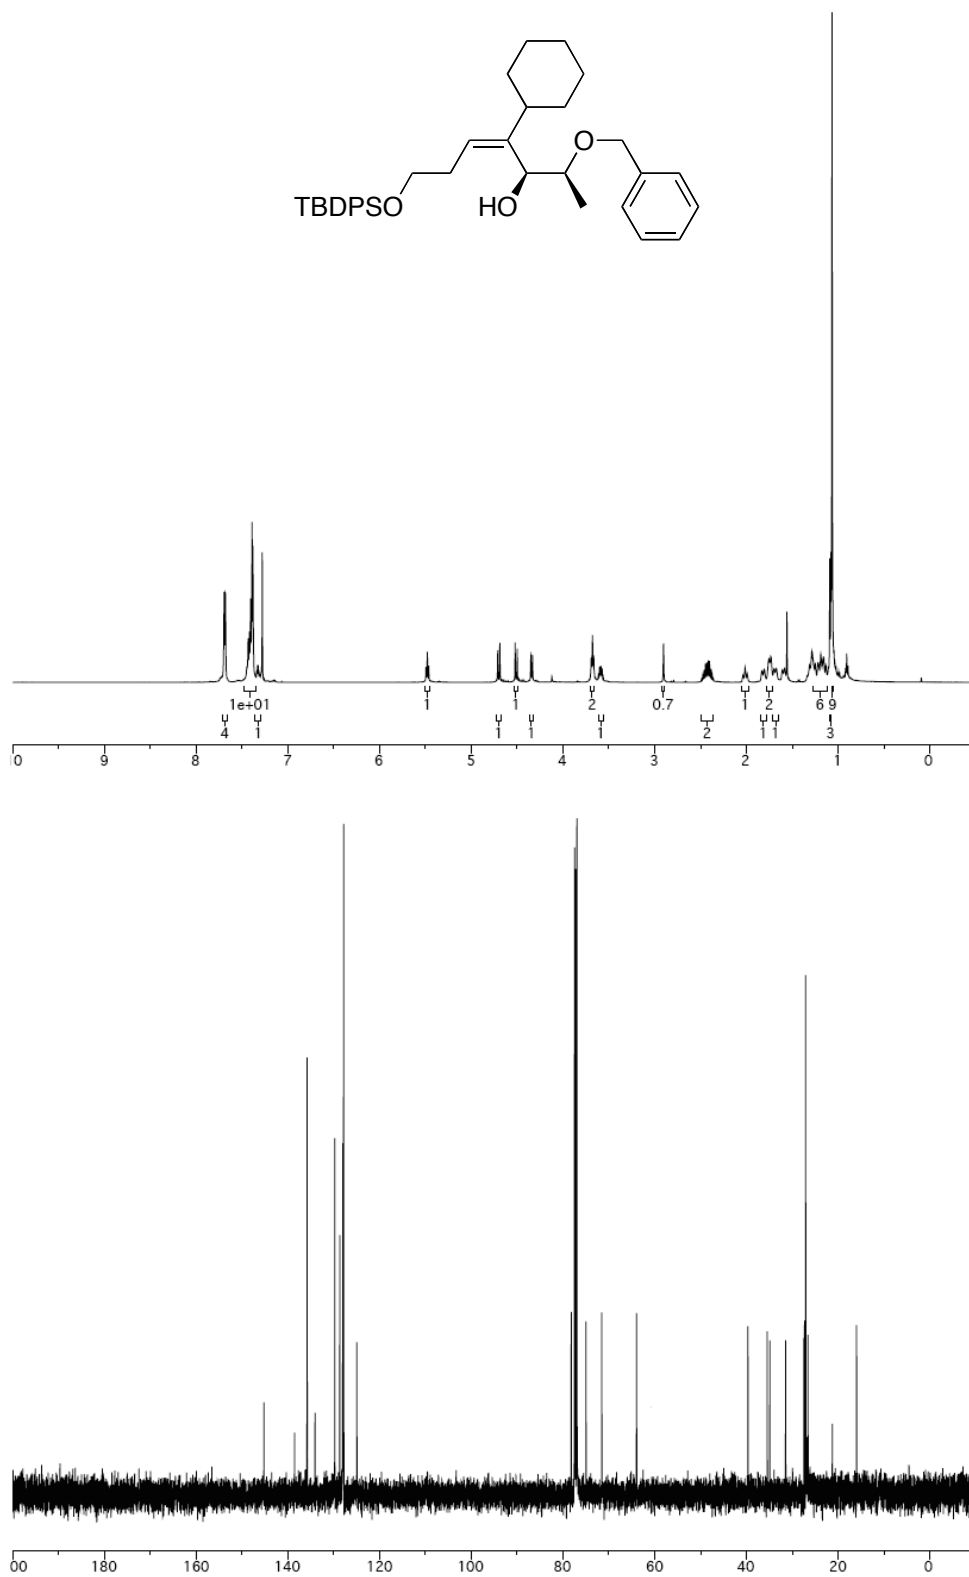

**Figure SI-11.** 500 MHz  $^1\text{H}$  and 125 MHz  $^{13}\text{C}$   $\{^1\text{H}\}$  NMR of **29** in  $\text{CDCl}_3$ .

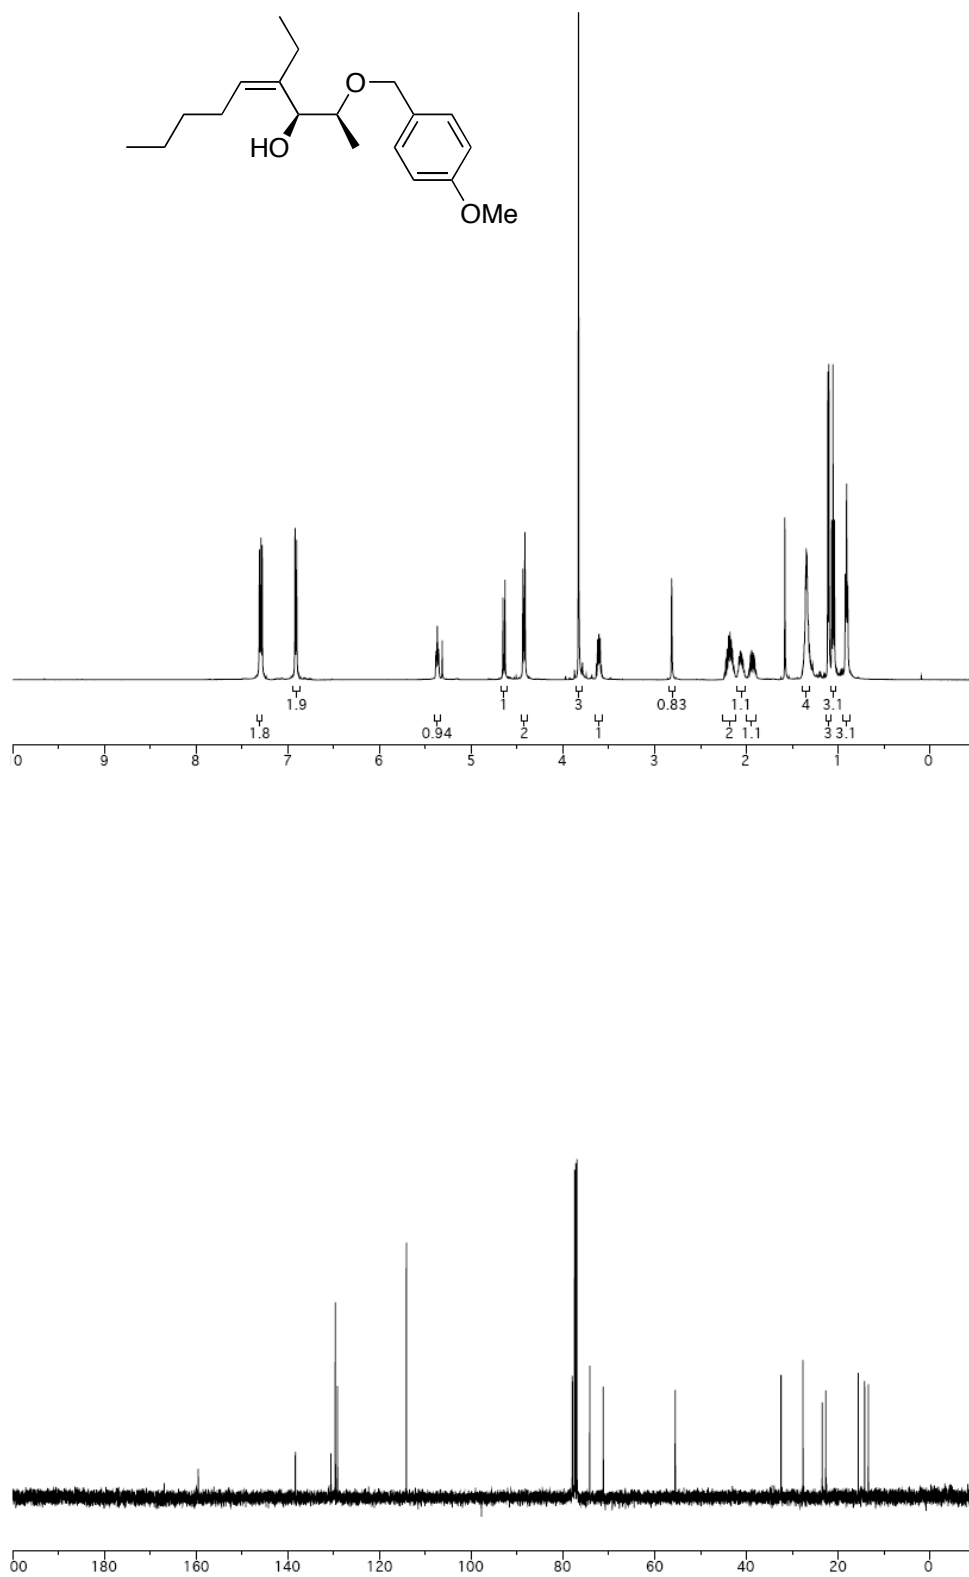

**Figure SI-12.** 500 MHz  $^1\text{H}$  and 125 MHz  $^{13}\text{C}$   $\{^1\text{H}\}$  NMR of **30** in  $\text{CDCl}_3$ .

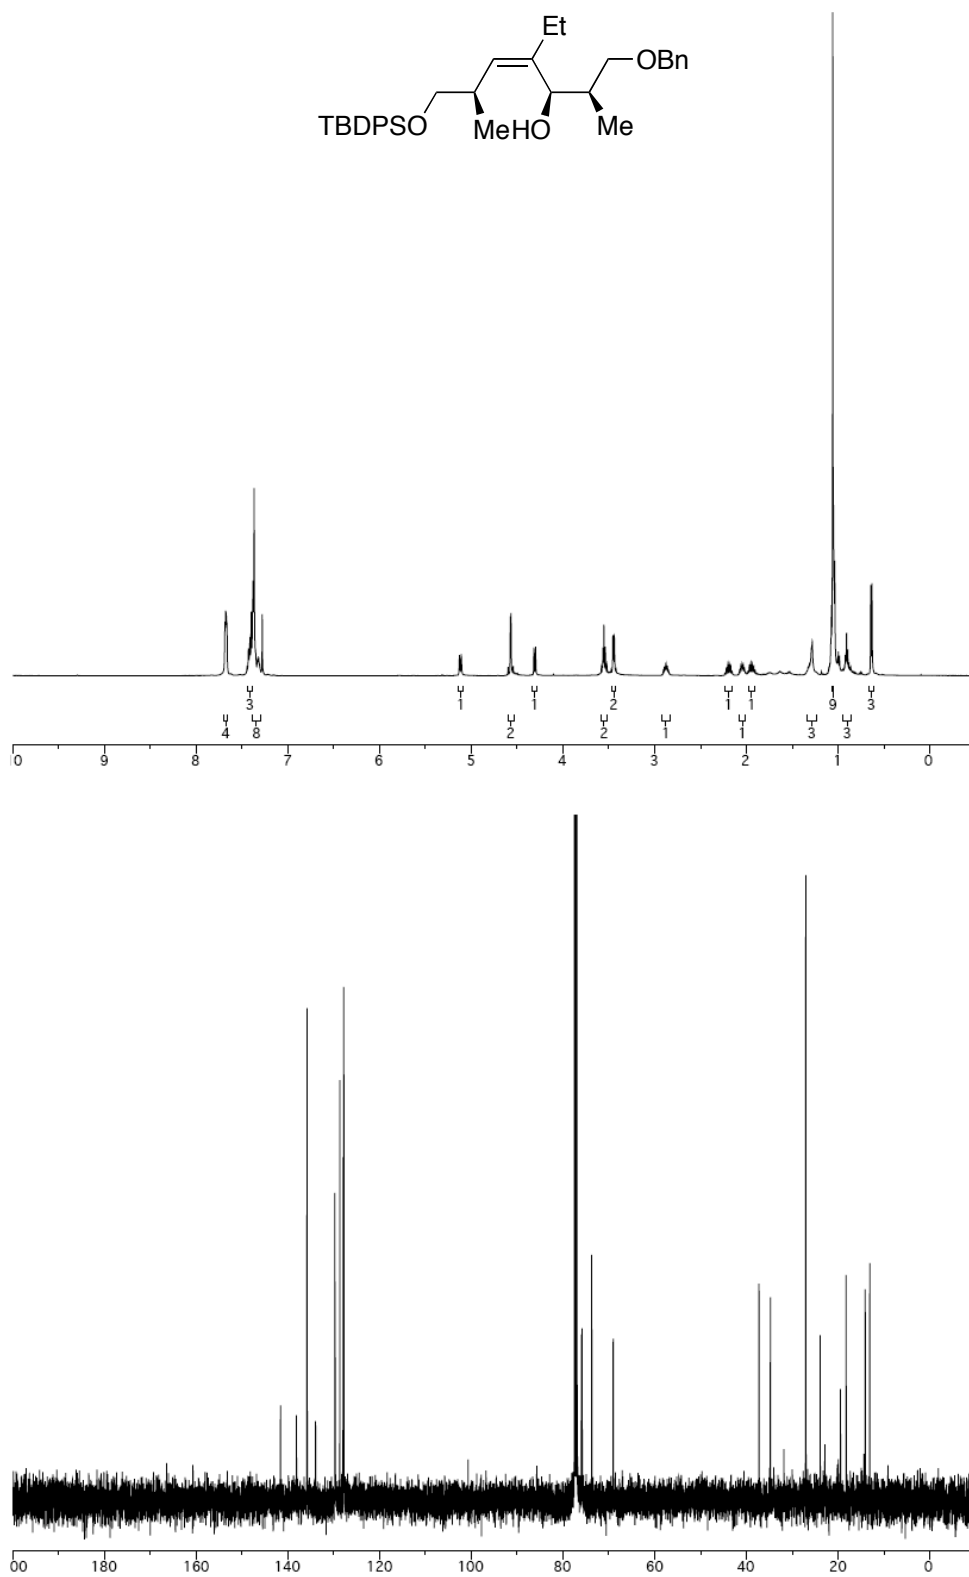

**Figure SI-13.** 500 MHz  $^1\text{H}$  and 125 MHz  $^{13}\text{C}$   $\{^1\text{H}\}$  NMR of **31** in  $\text{CDCl}_3$ .

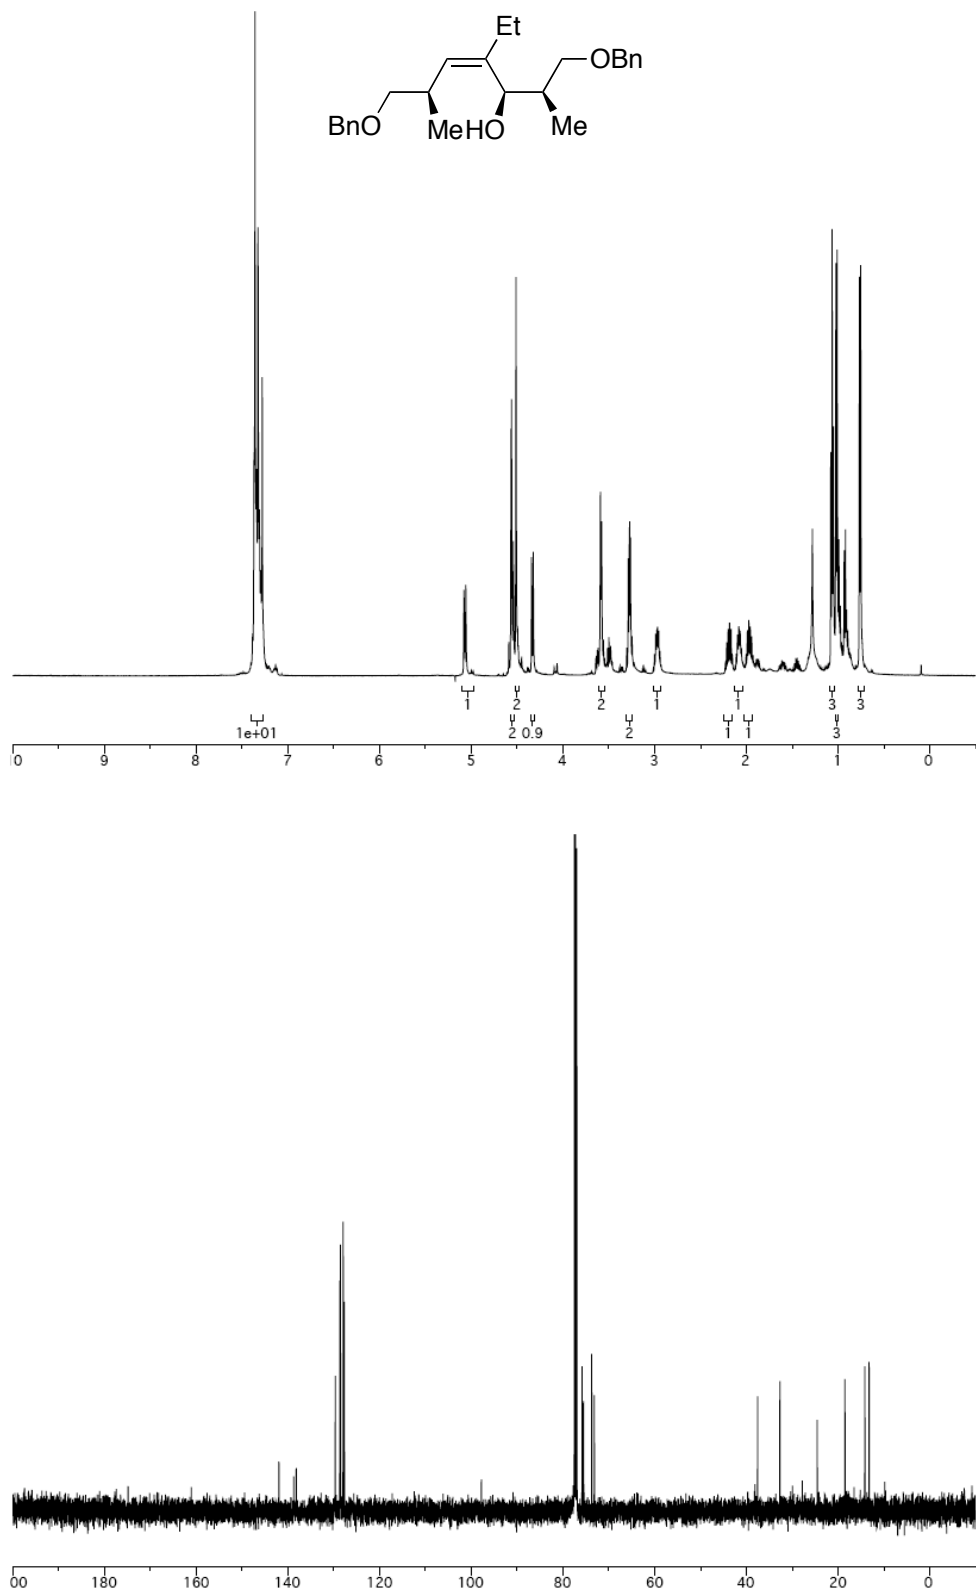

**Figure SI-14.** 500 MHz <sup>1</sup>H and 125 MHz <sup>13</sup>C {<sup>1</sup>H} NMR of **32** in CDCl<sub>3</sub>.

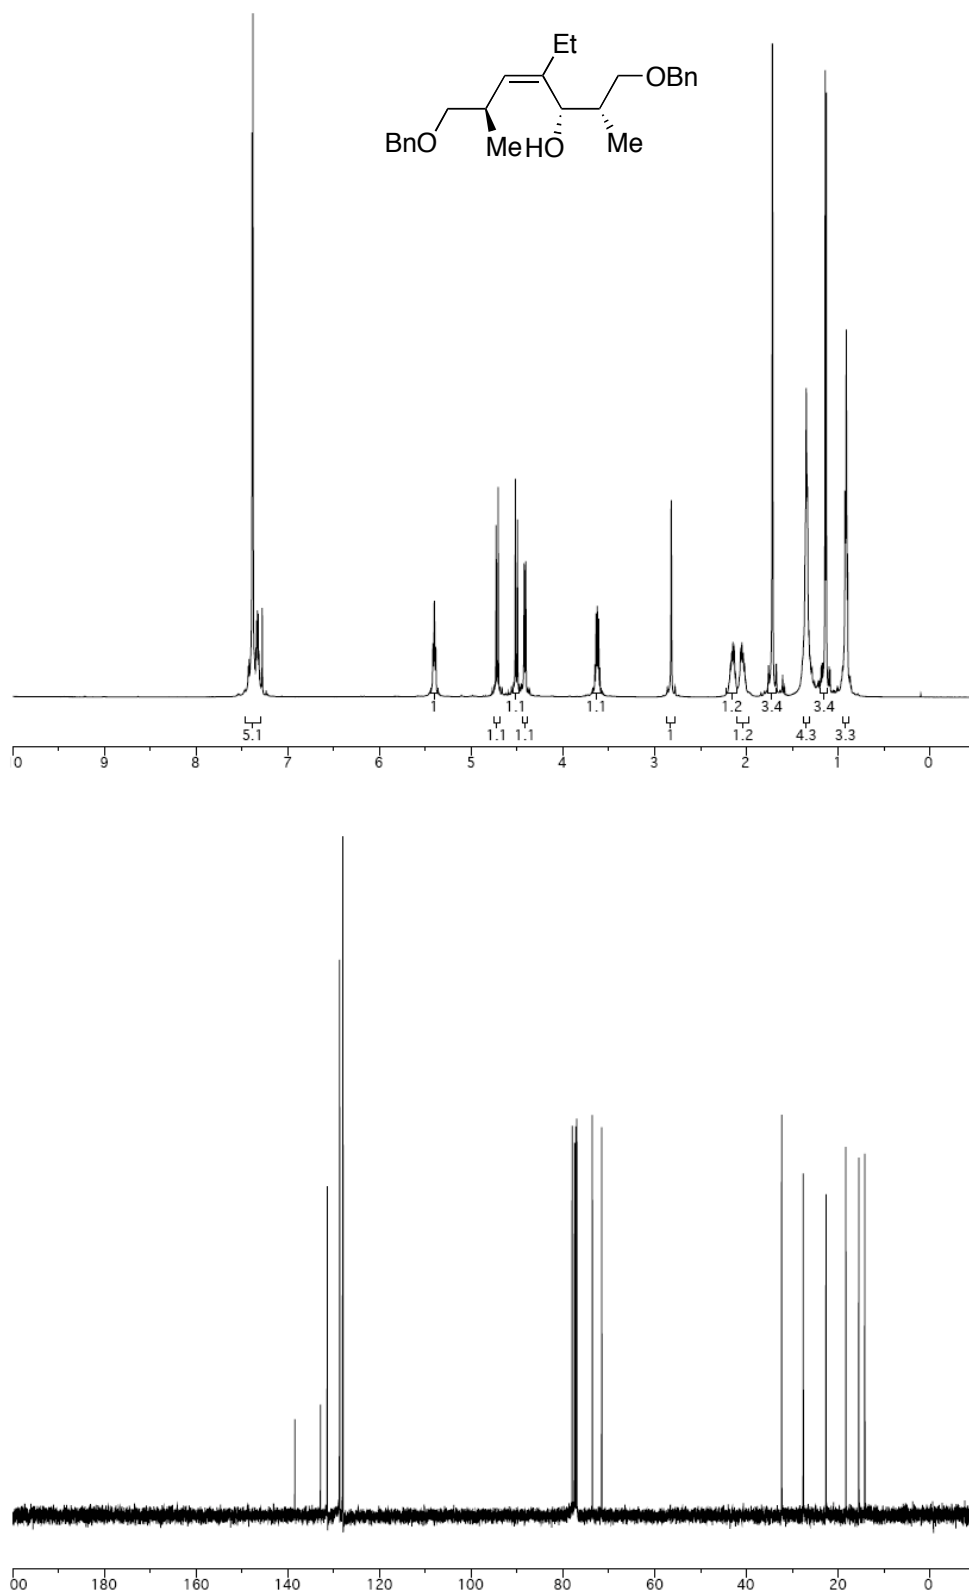

**Figure SI-15.** 500 MHz  $^1\text{H}$  and 125 MHz  $^{13}\text{C}$   $\{^1\text{H}\}$  NMR of **33** in  $\text{CDCl}_3$ .

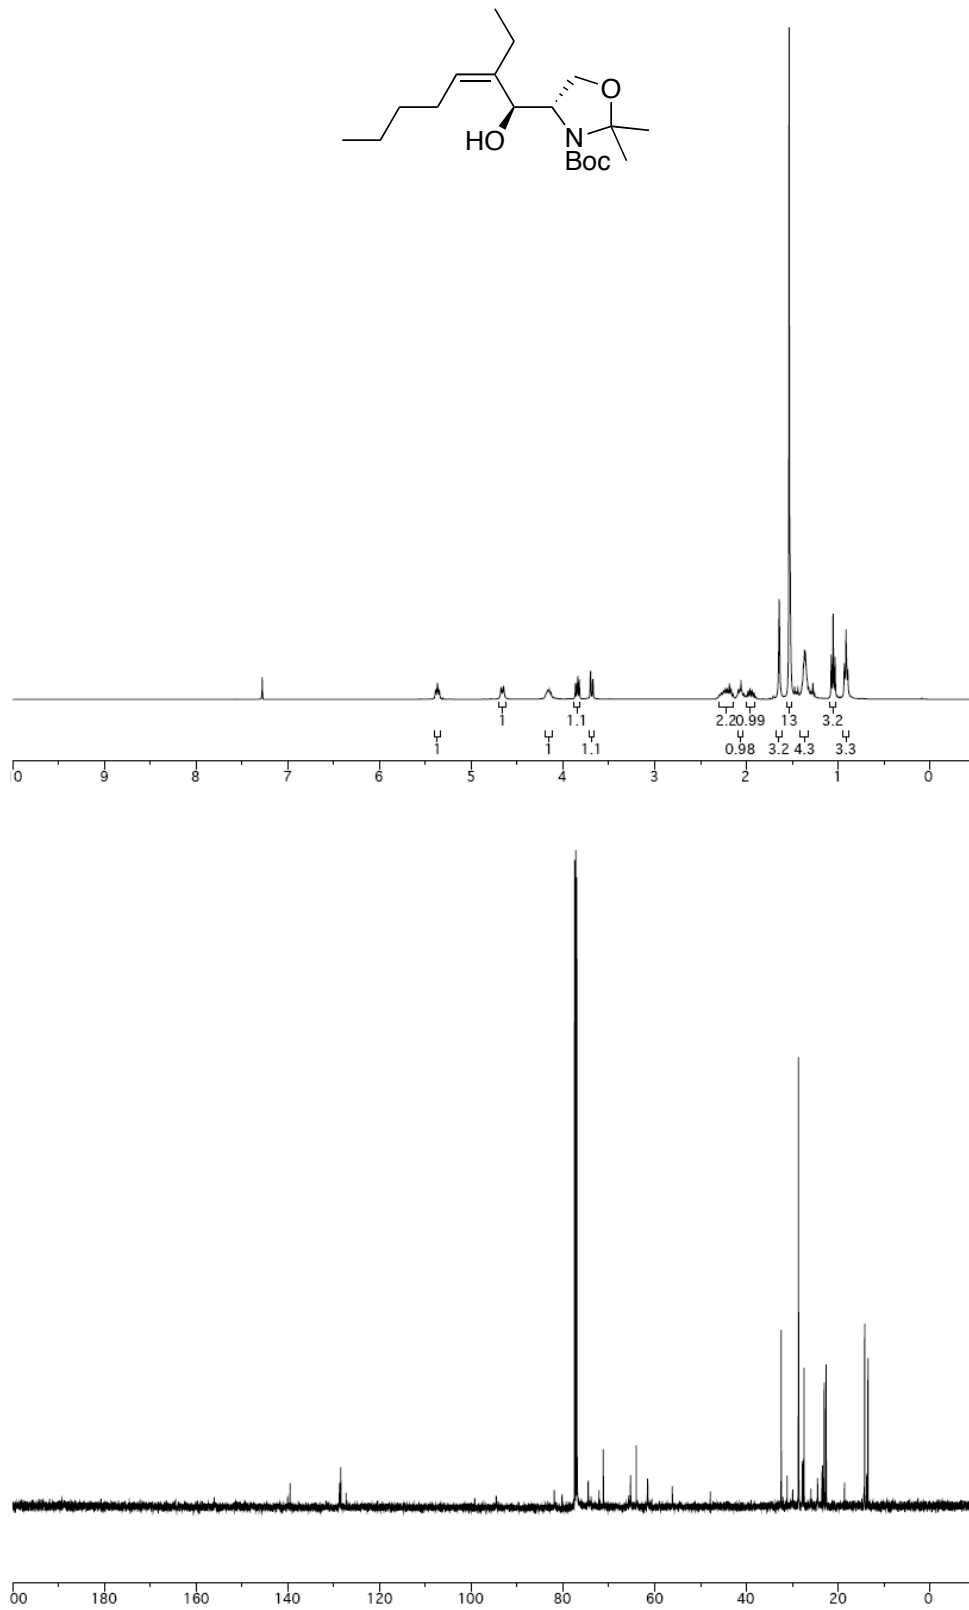

**Figure SI-16.** 360 MHz  $^1\text{H}$  and 125 MHz  $^{13}\text{C}$   $\{^1\text{H}\}$  NMR of **34** in  $\text{CDCl}_3$ .

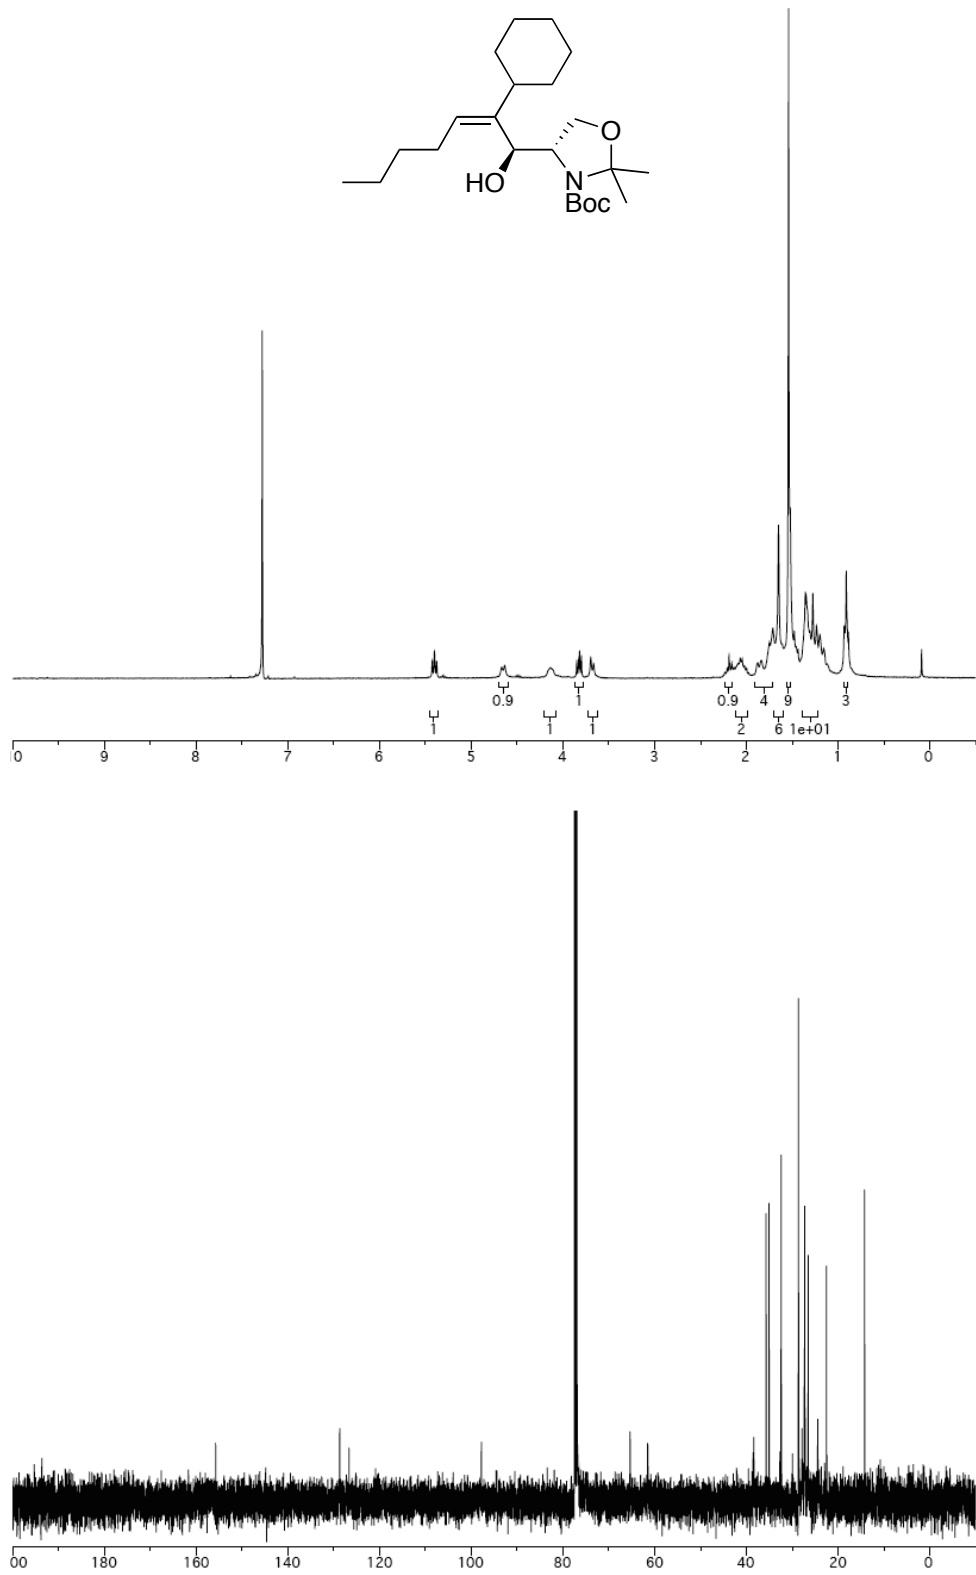

**Figure SI-17.** 500 MHz  $^1\text{H}$  and 125 MHz  $^{13}\text{C}$   $\{^1\text{H}\}$  NMR of **35** in  $\text{CDCl}_3$ .



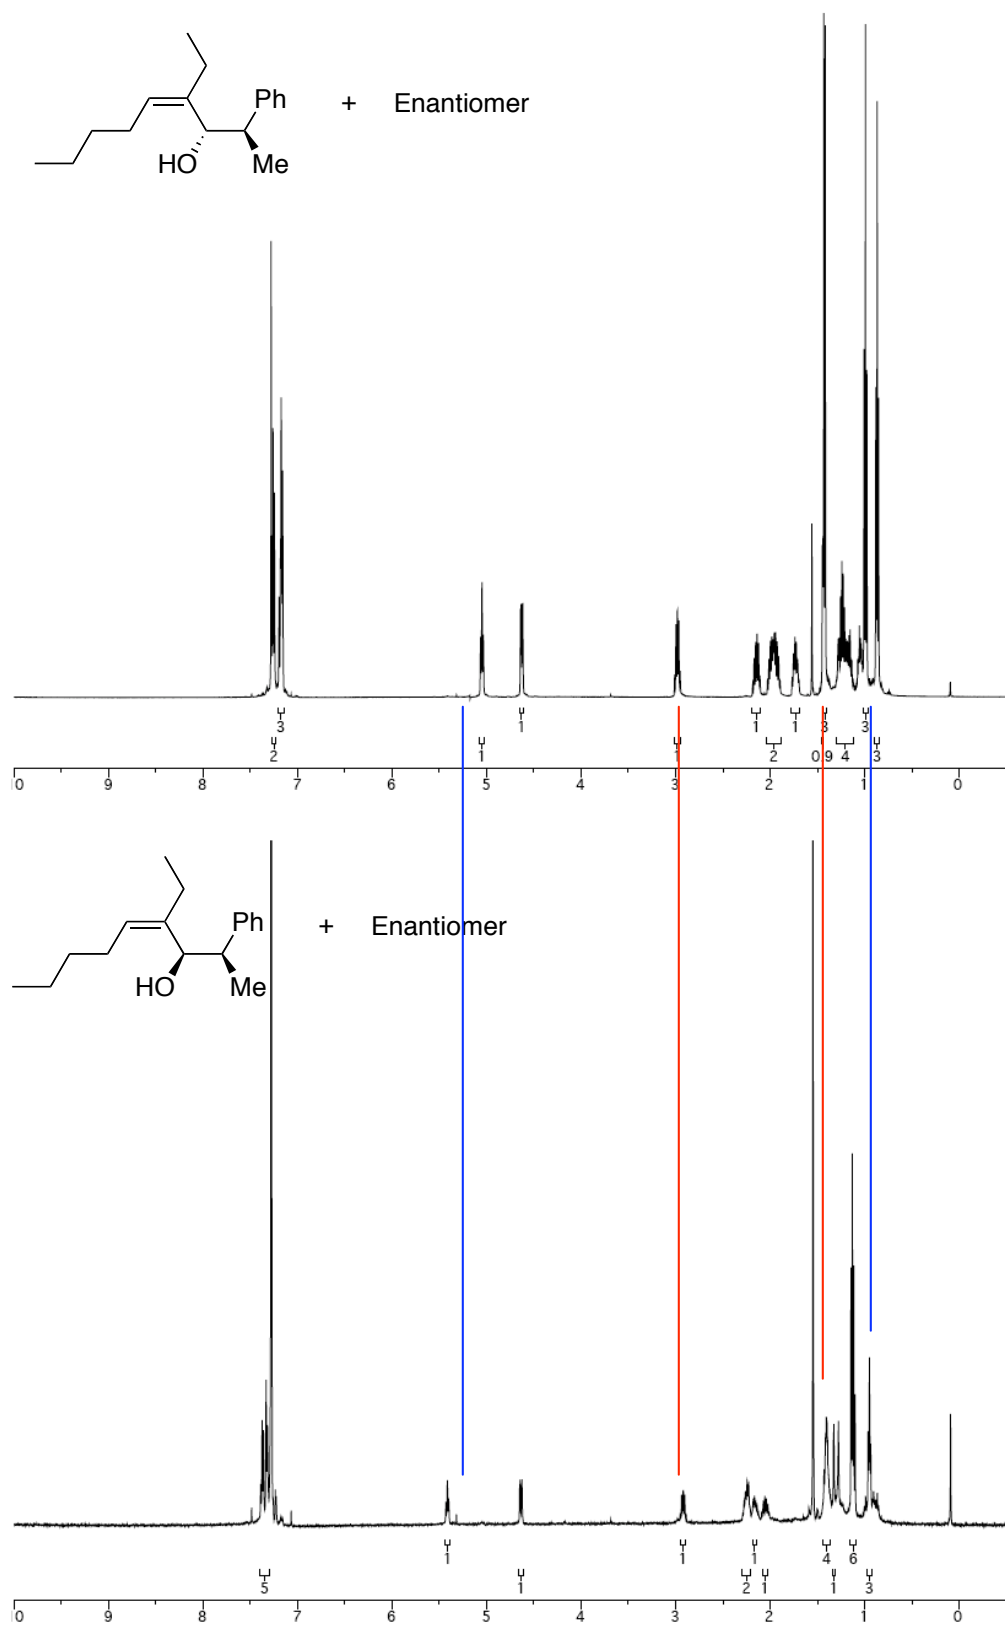

**Figure SI-18.** 500 MHz <sup>1</sup>H NMRs of **36** (major and minor) in CDCl<sub>3</sub>, respectively.

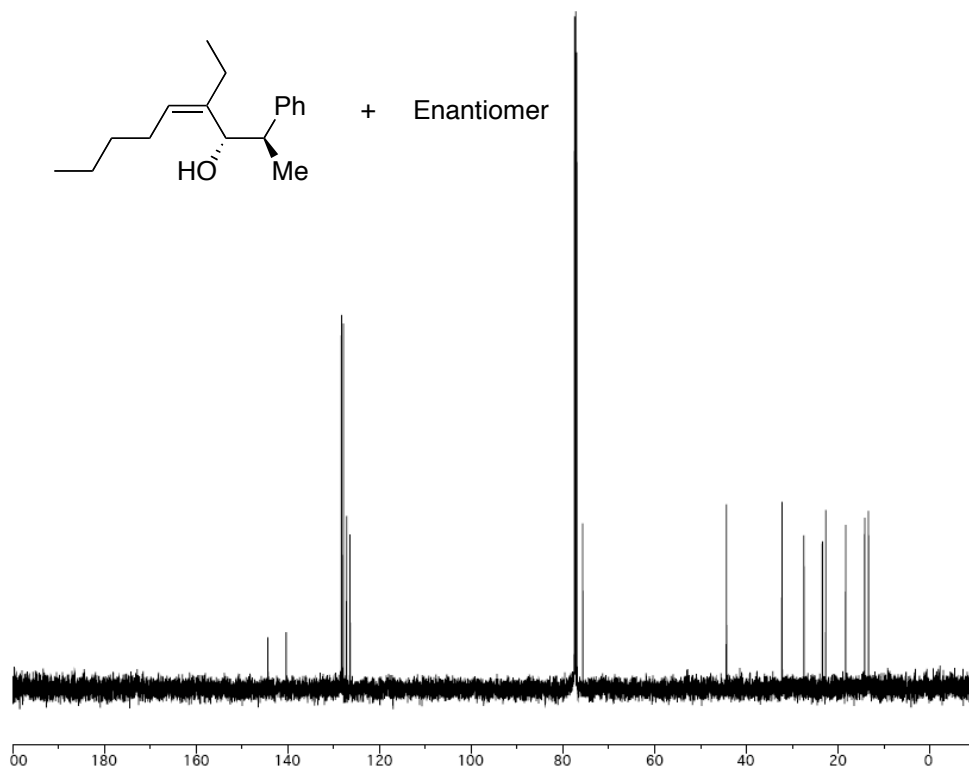

**Figure SI-19.** 125 MHz  $^{13}\text{C}$   $\{^1\text{H}\}$  NMR of **36** (major diastereomer) in  $\text{CDCl}_3$ .

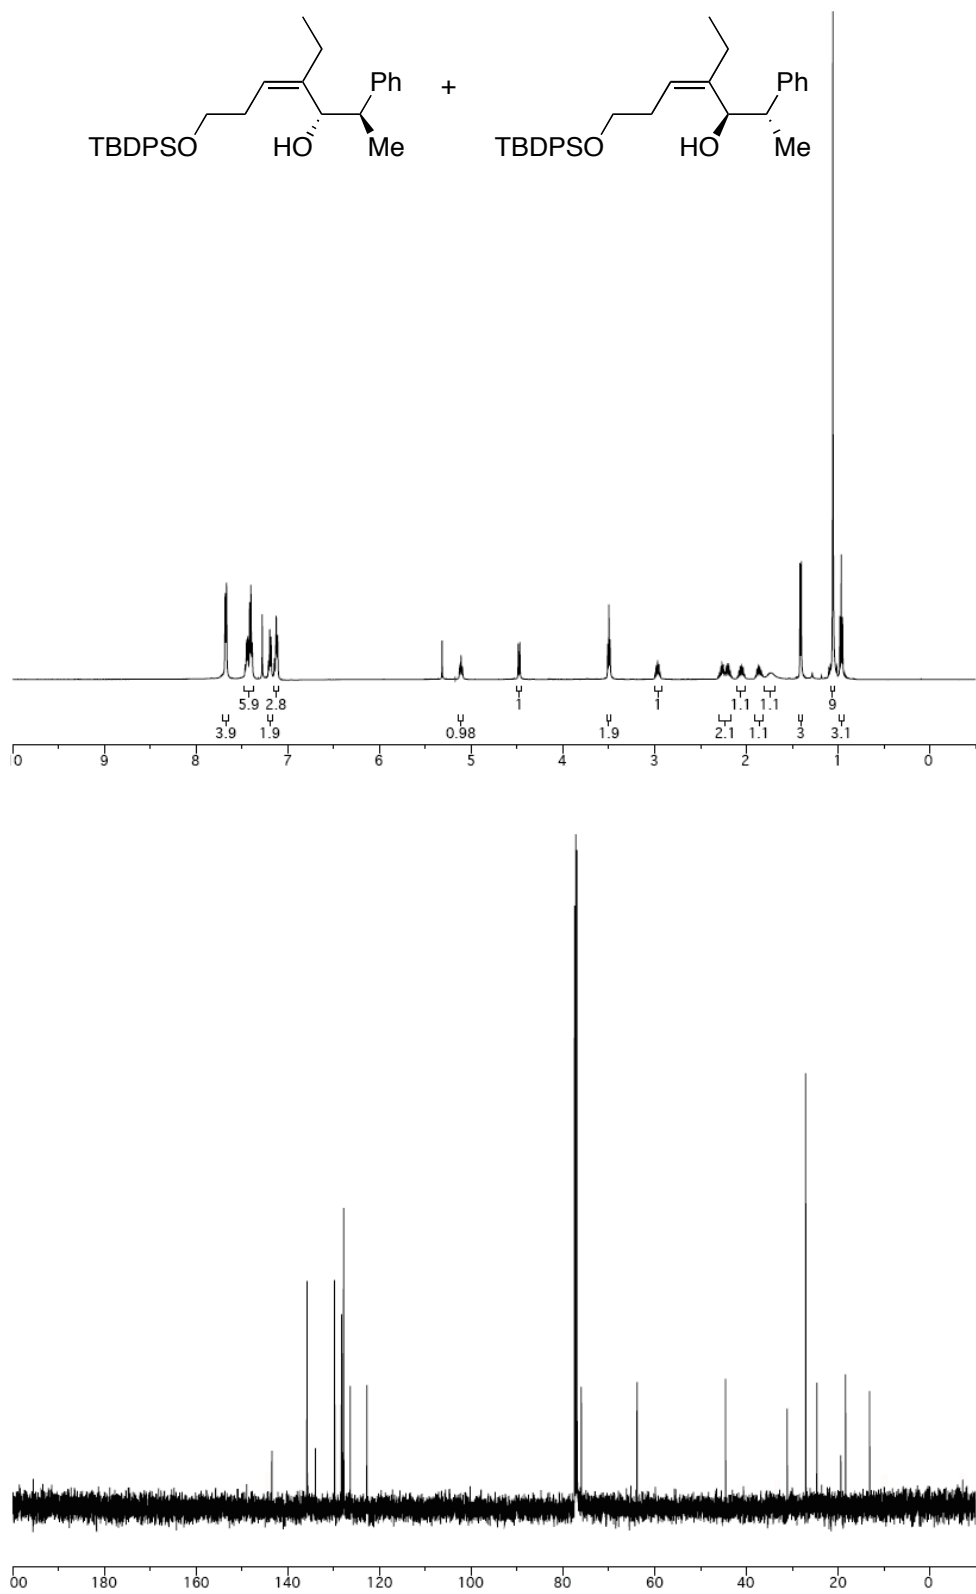

**Figure SI-20.** 500 MHz  $^1\text{H}$  and 125 MHz  $^{13}\text{C}$   $\{^1\text{H}\}$  NMR of **37** in  $\text{CDCl}_3$ .

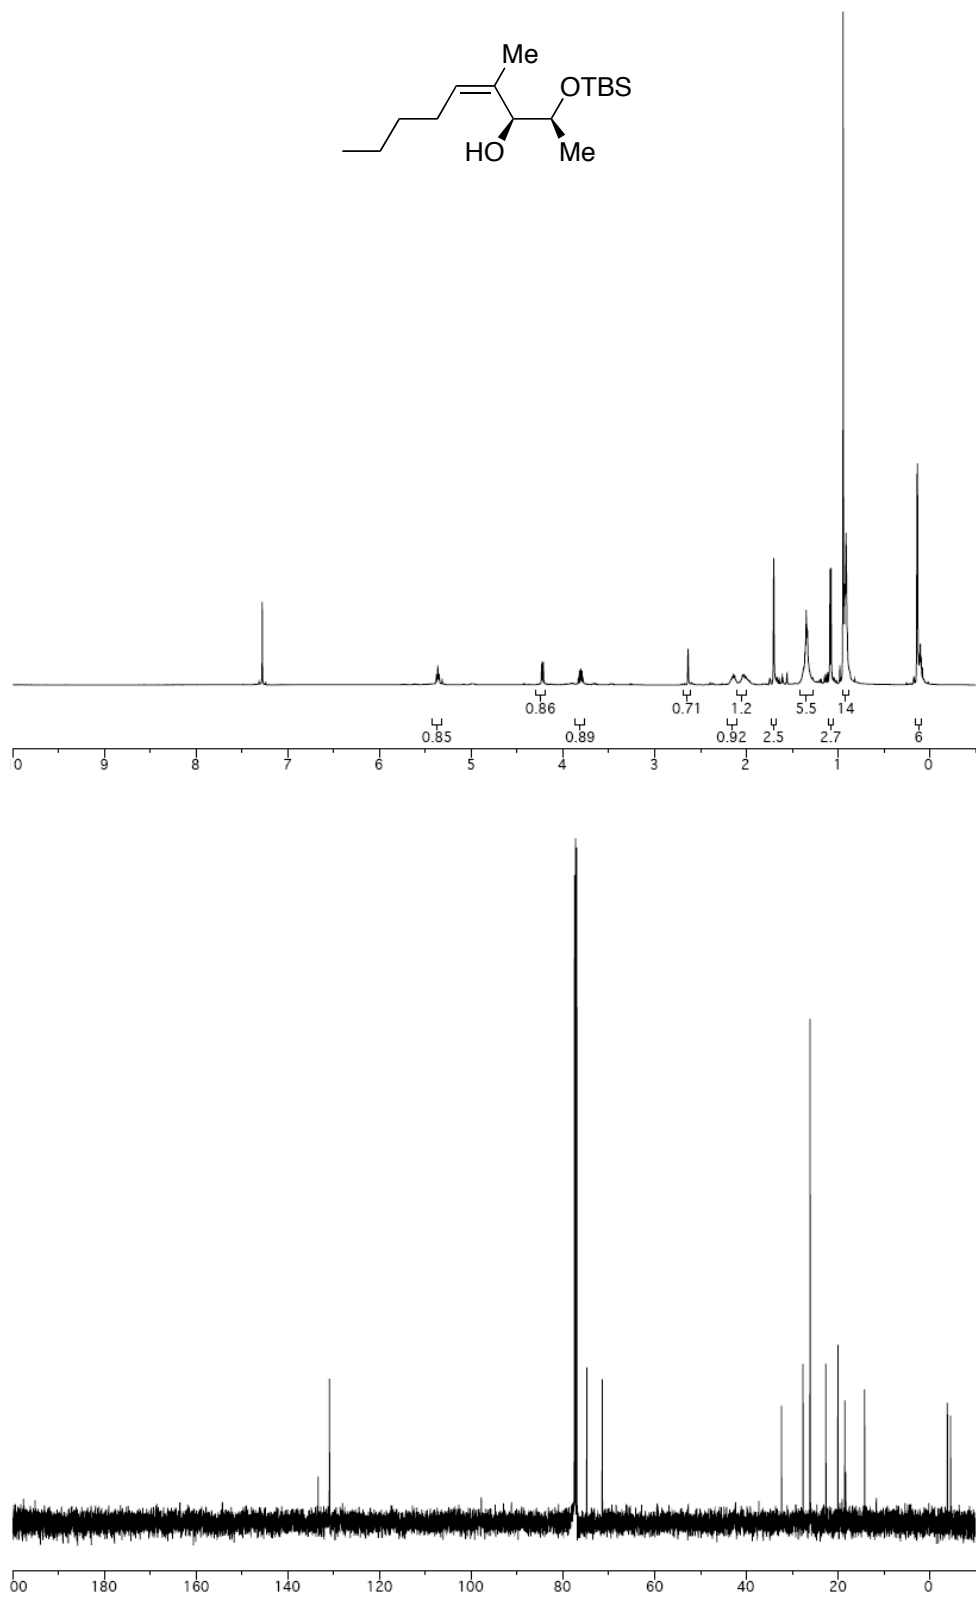

**Figure SI-21.** 500 MHz  $^1\text{H}$  and 125 MHz  $^{13}\text{C}$   $\{^1\text{H}\}$  NMR of **41** in  $\text{CDCl}_3$ .

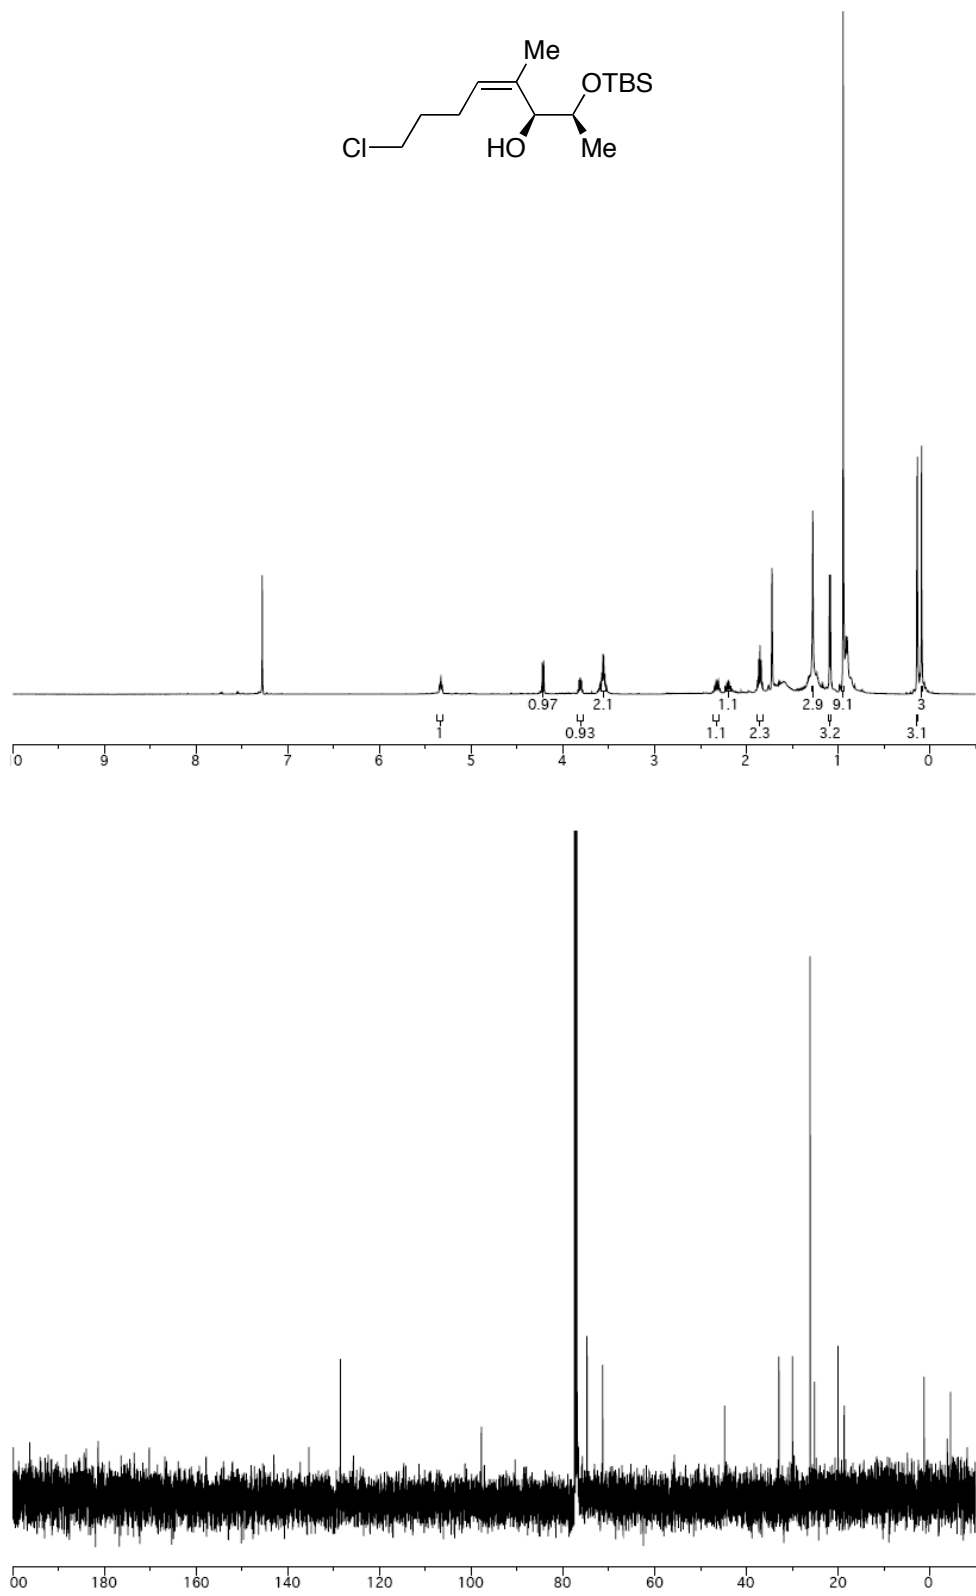

**Figure SI-22.** 500 MHz  $^1\text{H}$  and 125 MHz  $^{13}\text{C}$   $\{^1\text{H}\}$  NMR of **42** in  $\text{CDCl}_3$ .



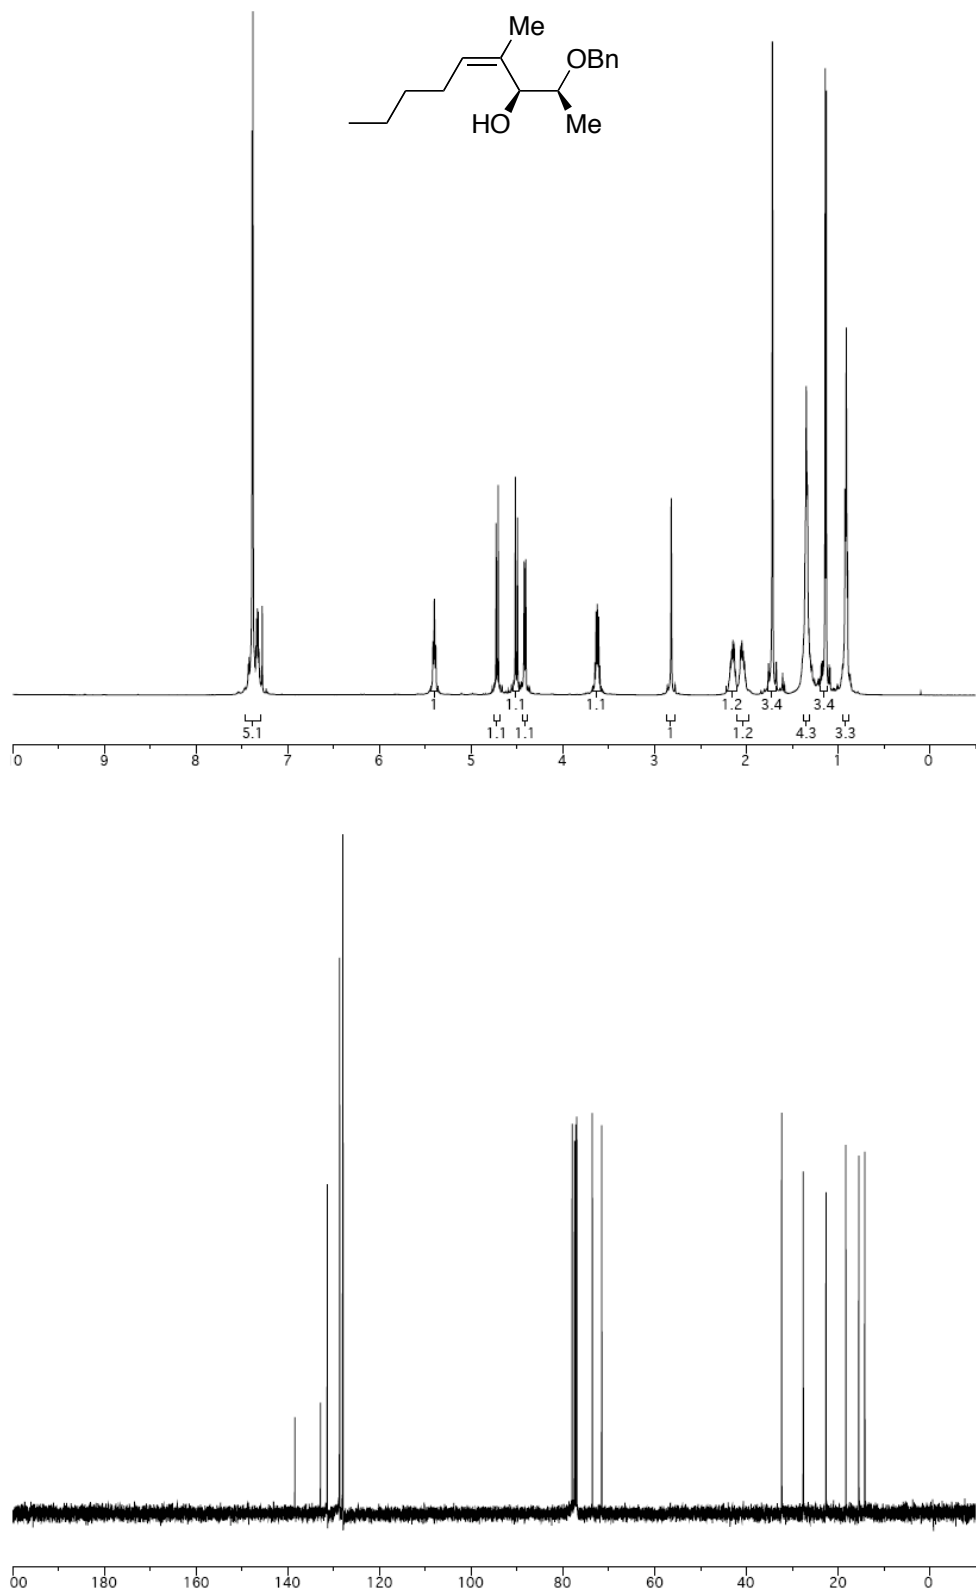

**Figure SI-24.** 500 MHz  $^1\text{H}$  and 125 MHz  $^{13}\text{C}$   $\{^1\text{H}\}$  NMR of **44** in  $\text{CDCl}_3$ .

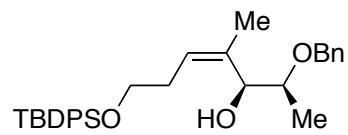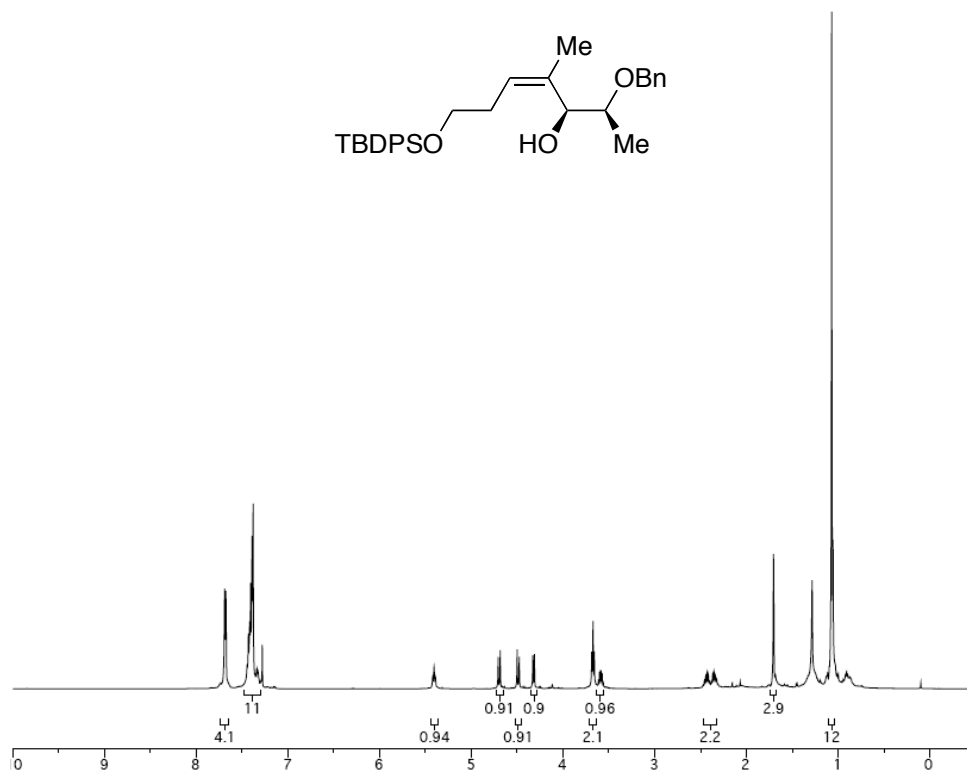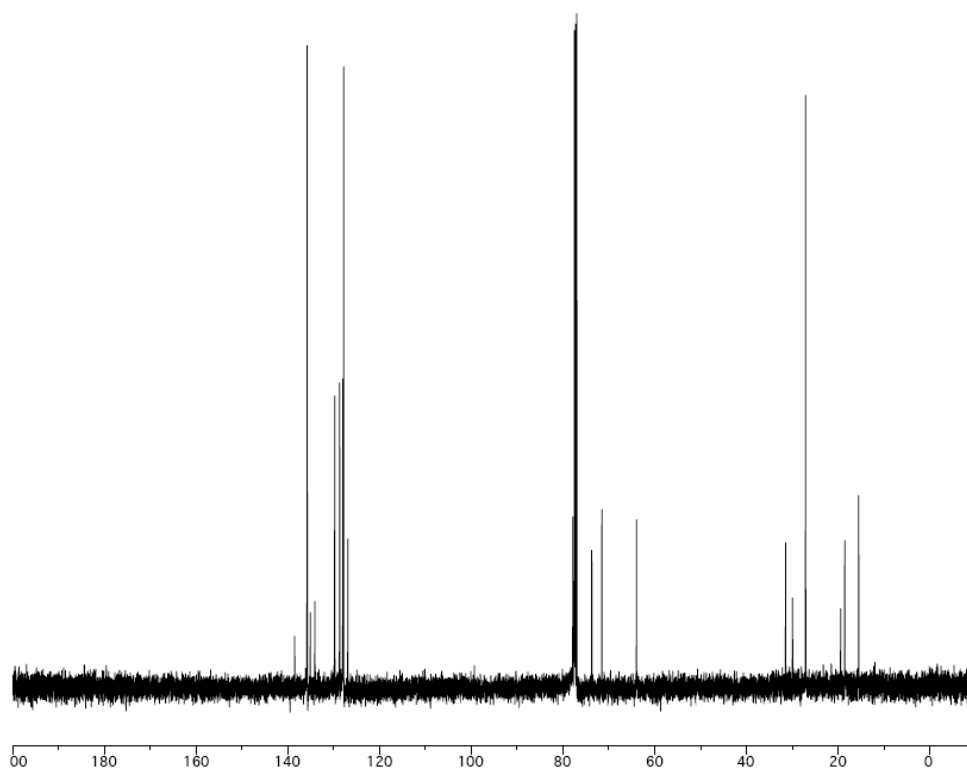

**Figure SI-25.** 500 MHz  $^1\text{H}$  and 125 MHz  $^{13}\text{C}$   $\{^1\text{H}\}$  NMR of **45** in  $\text{CDCl}_3$ .



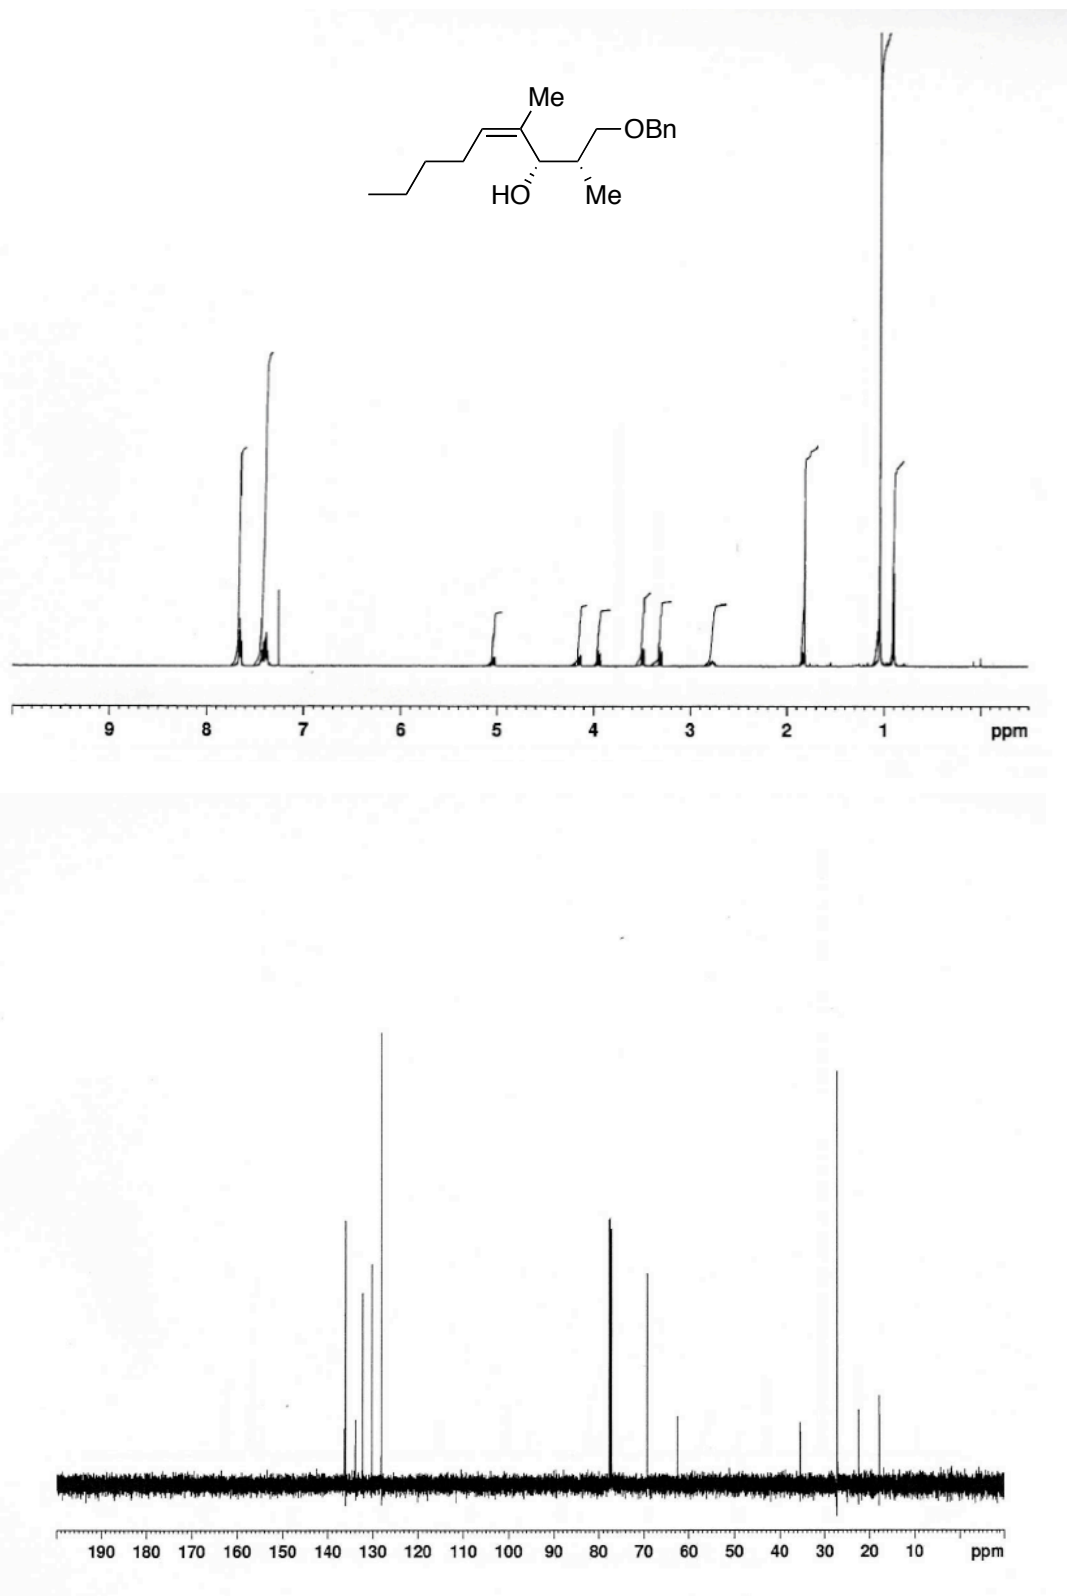

**Figure SI-26.** 500 MHz  $^1\text{H}$  and 125 MHz  $^{13}\text{C}$   $\{^1\text{H}\}$  NMR of **46** in  $\text{CDCl}_3$ .



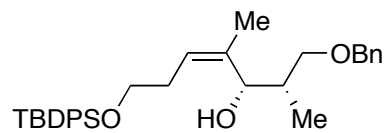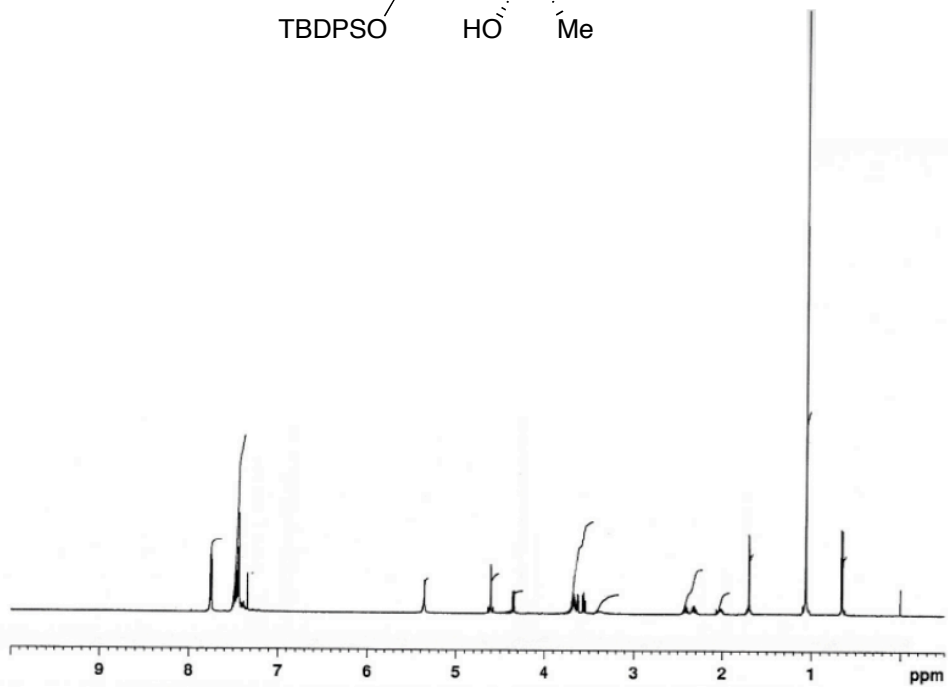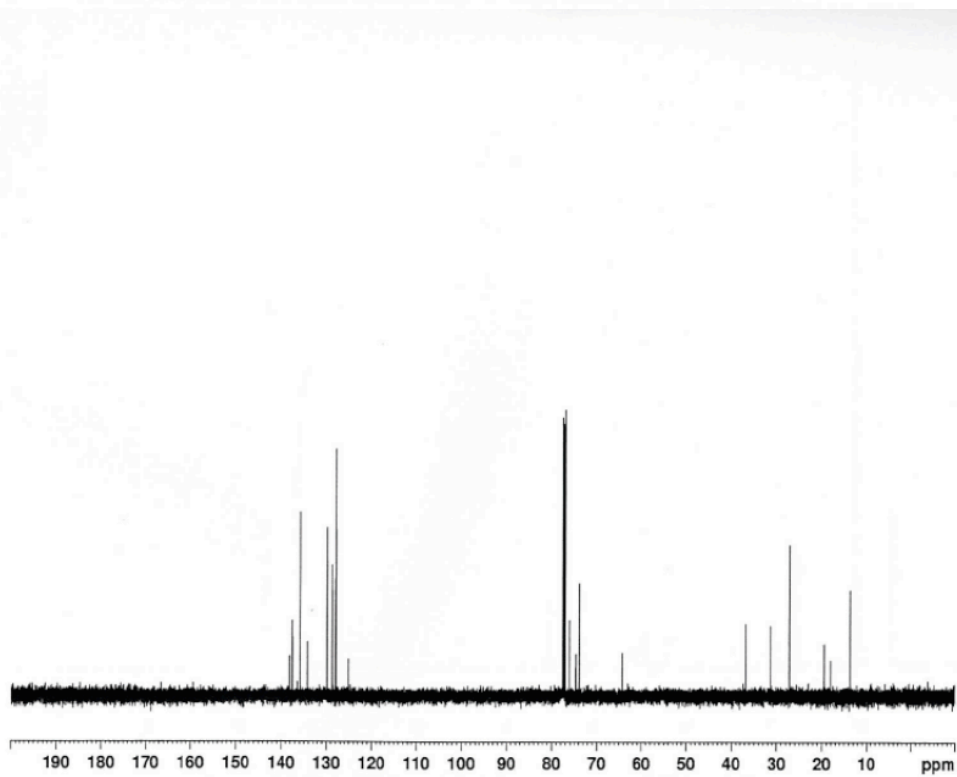

**Figure SI-28.** 500 MHz  $^1\text{H}$  and 125 MHz  $^{13}\text{C}$   $\{^1\text{H}\}$  NMR of **48** in  $\text{CDCl}_3$ .

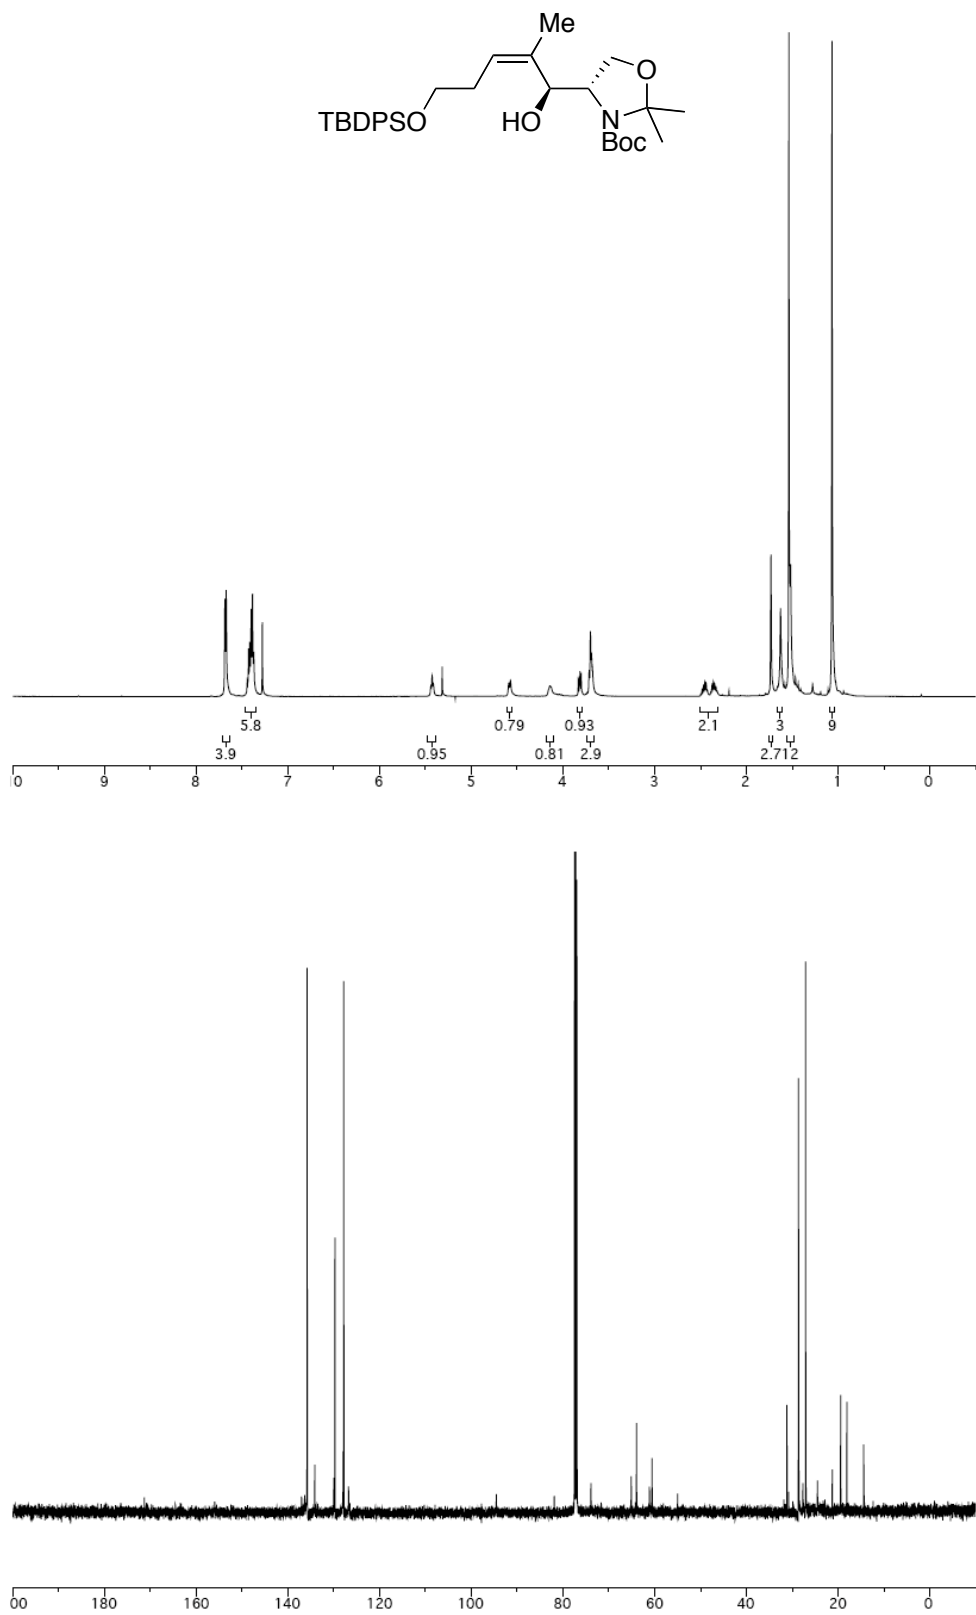

**Figure SI-29.** 500 MHz  $^1\text{H}$  and 125 MHz  $^{13}\text{C}$   $\{^1\text{H}\}$  NMR of **49** in  $\text{CDCl}_3$ .

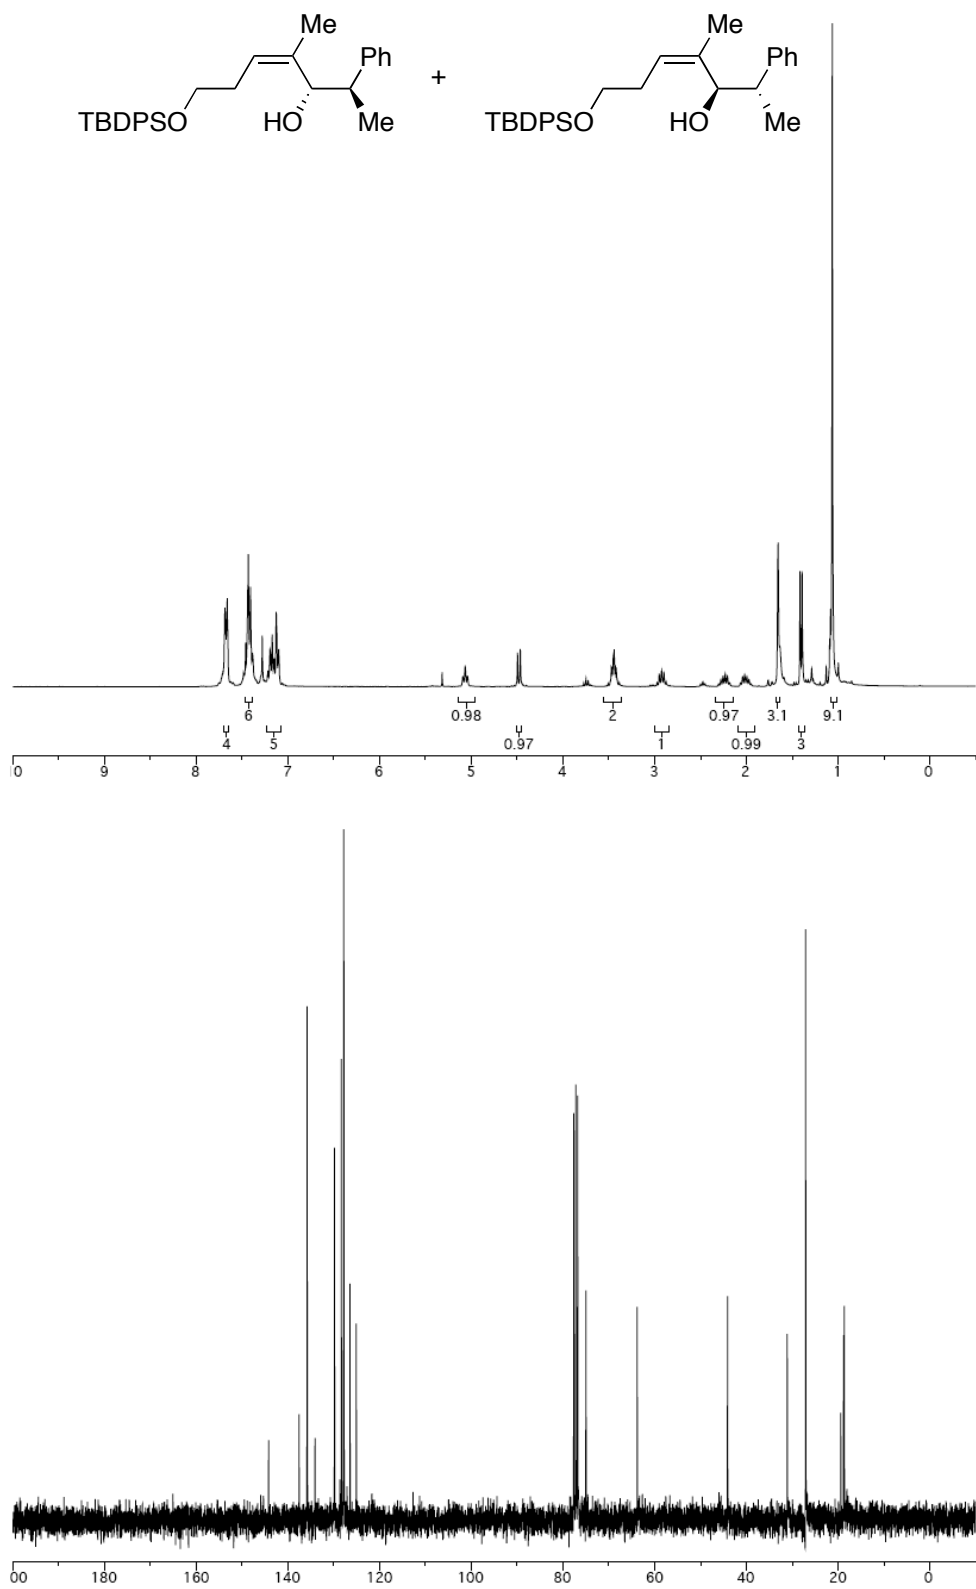

**Figure SI-30.** 500 MHz <sup>1</sup>H and 125 MHz <sup>13</sup>C {<sup>1</sup>H} NMR of **50** in CDCl<sub>3</sub>.

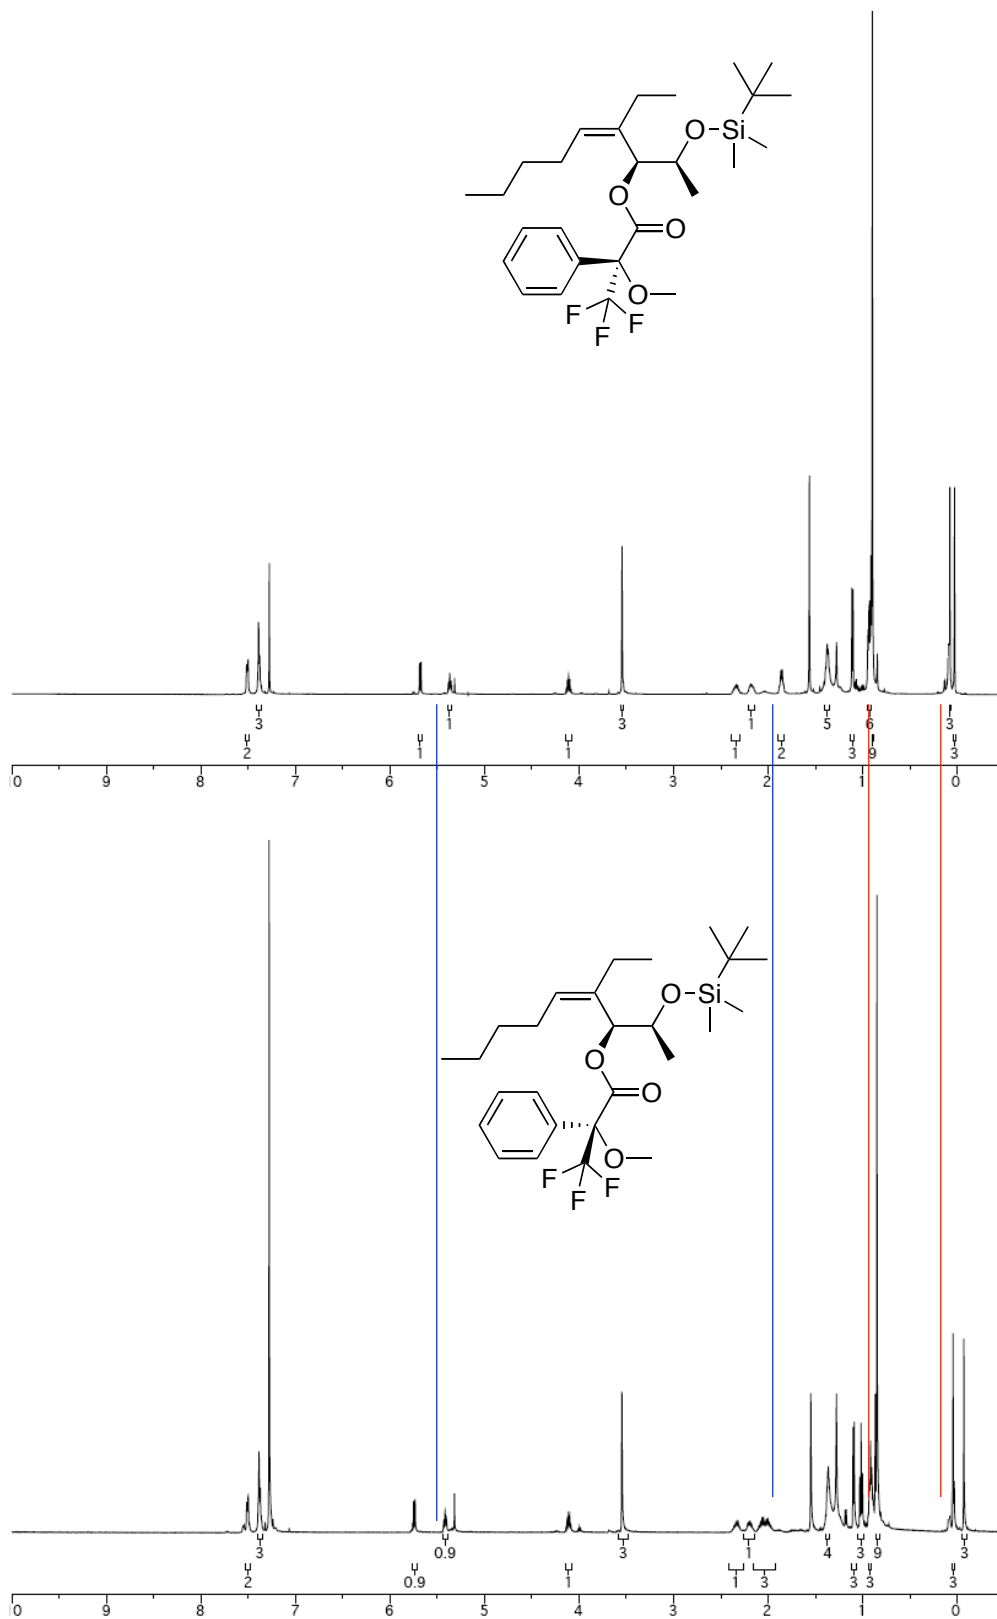

**Figure SI-31.** 500 MHz  $^1\text{H}$  NMR of (*S*) and (*R*)-Mosher Ester of **19** in  $\text{CDCl}_3$ .

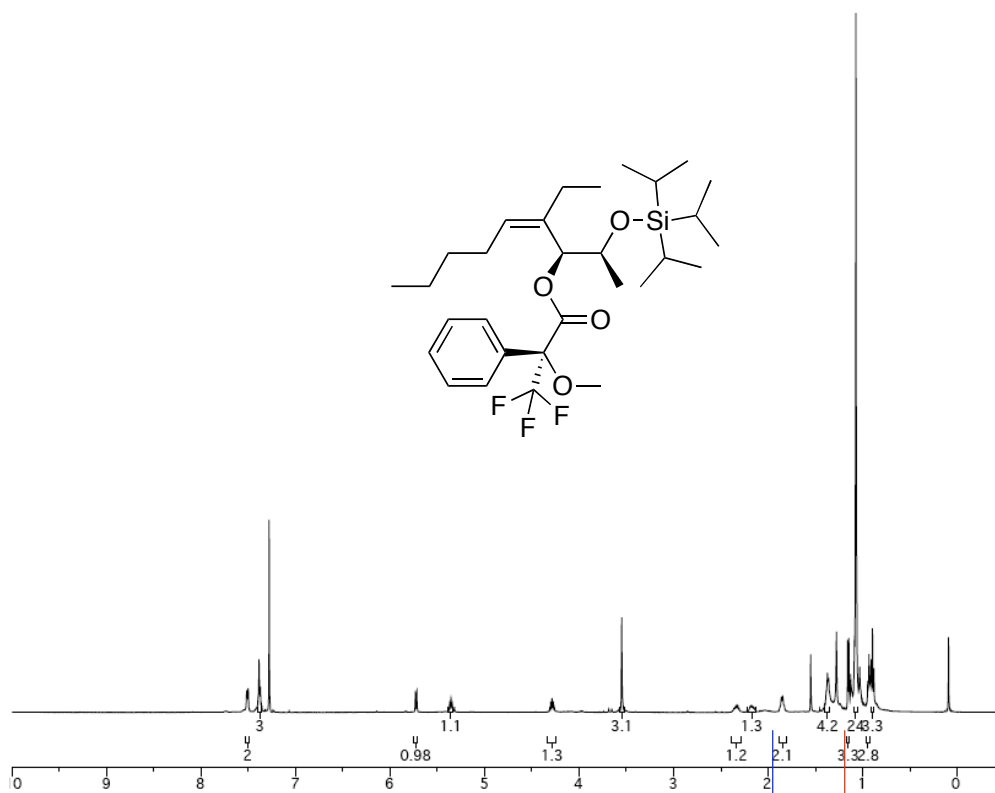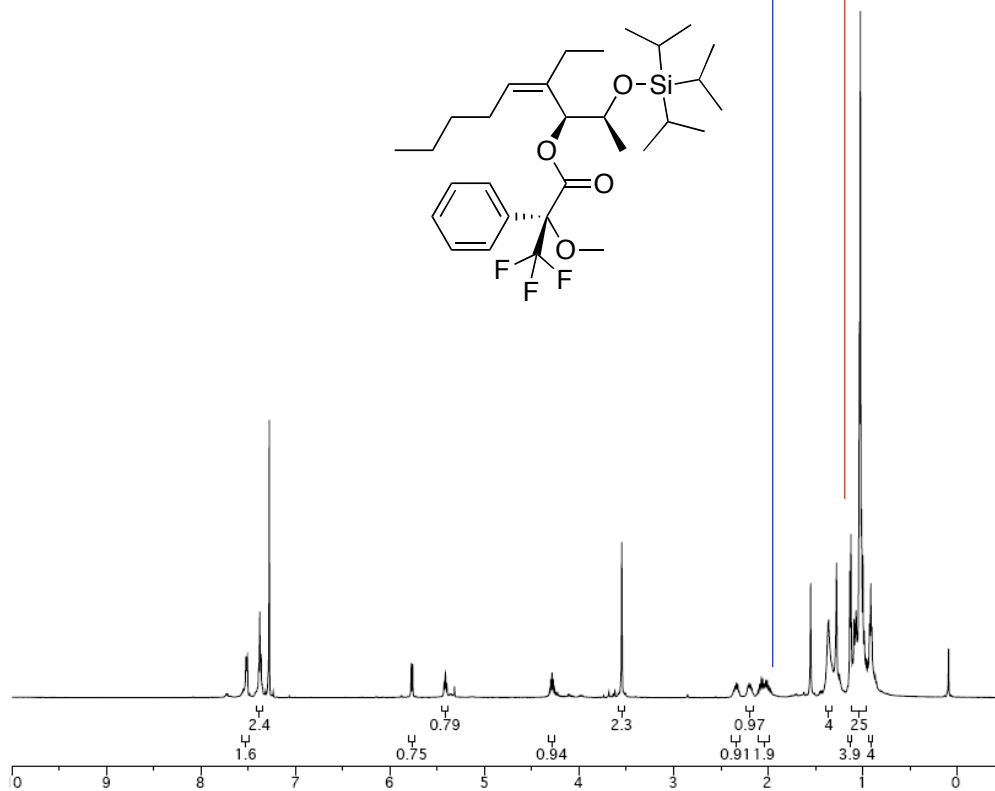

**Figure SI-32.** 500 MHz  $^1\text{H}$  NMR of (*S*) and (*R*)-Moshher Ester of **25** in  $\text{CDCl}_3$ .

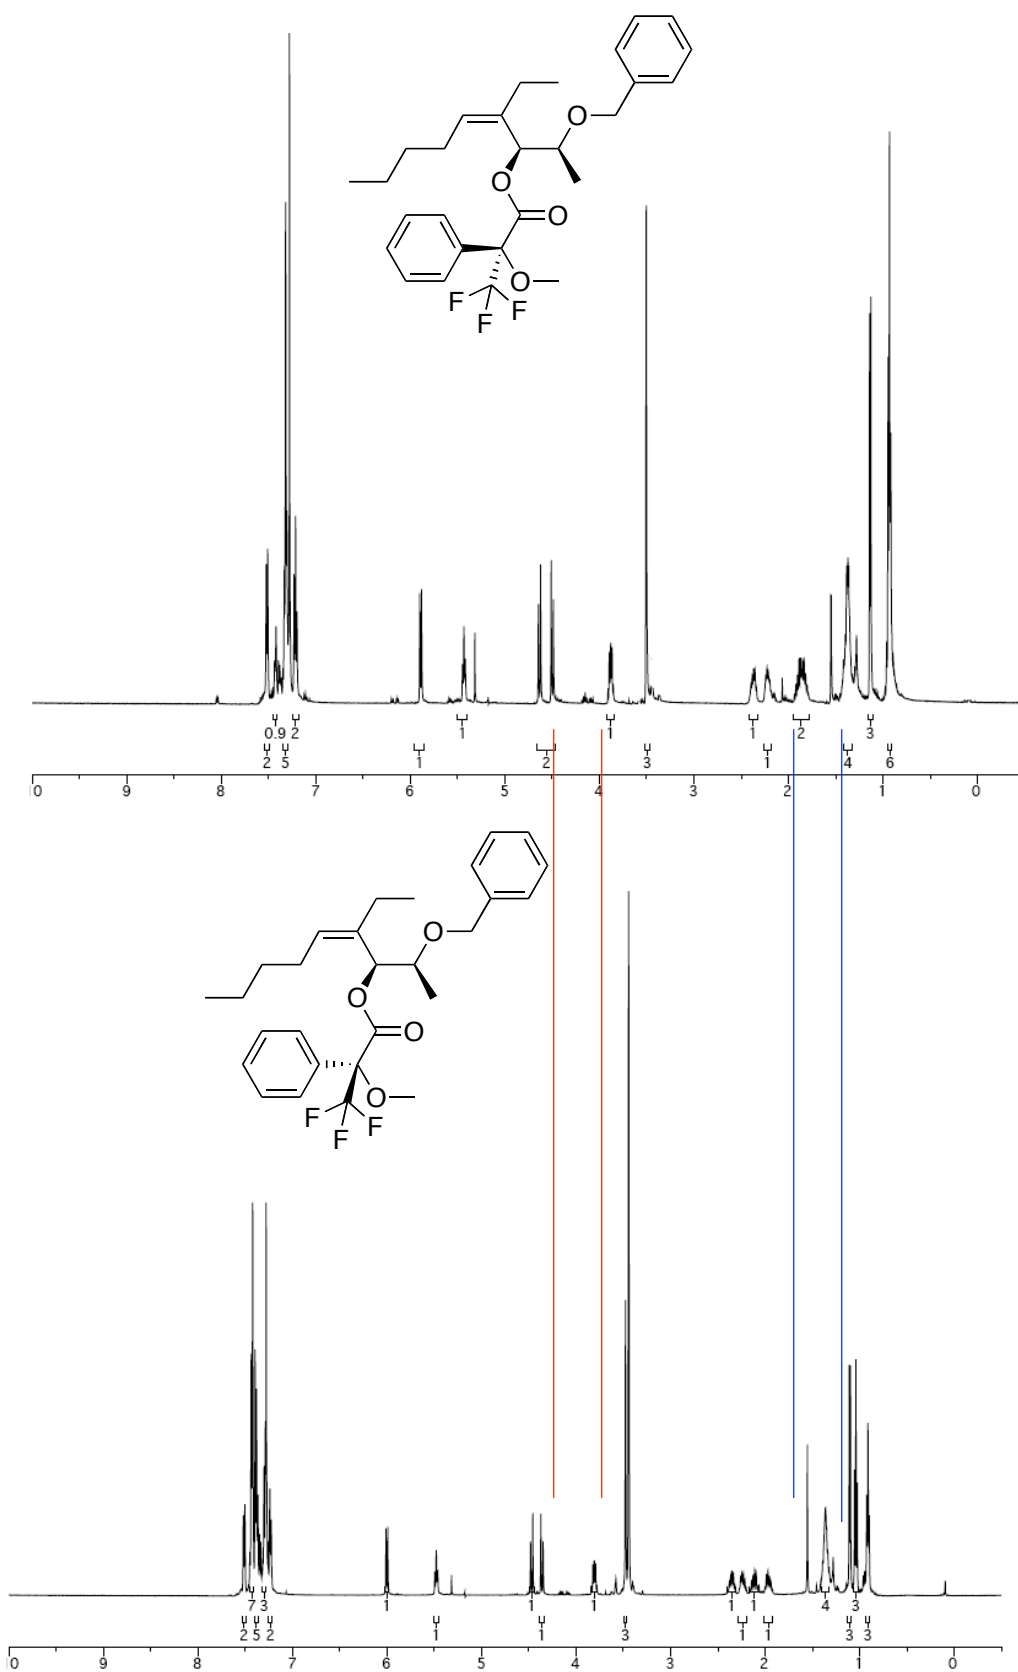

**Figure SI-33.** 500 MHz <sup>1</sup>H NMR of (*S*) and (*R*)-Mosher Ester of **26** in CDCl<sub>3</sub>.



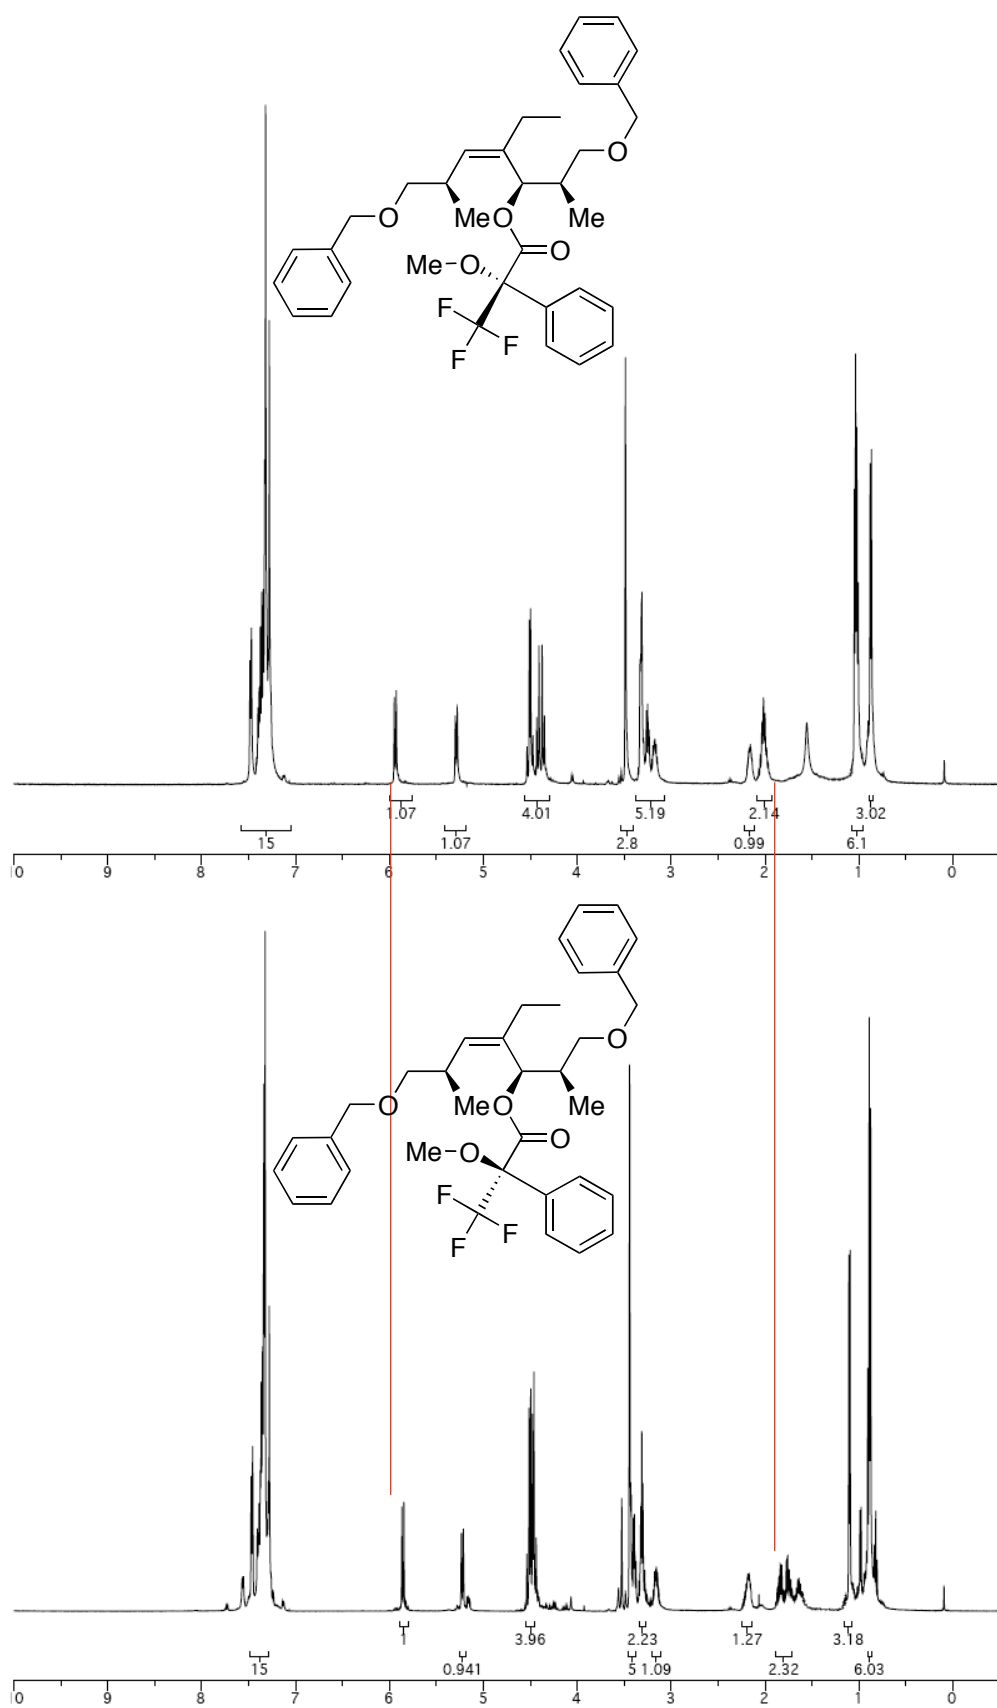

**Figure SI-34.** 500 MHz  $^1\text{H}$  NMR of (*S*) and (*R*)-Mosher Ester of **32** in  $\text{CDCl}_3$ .



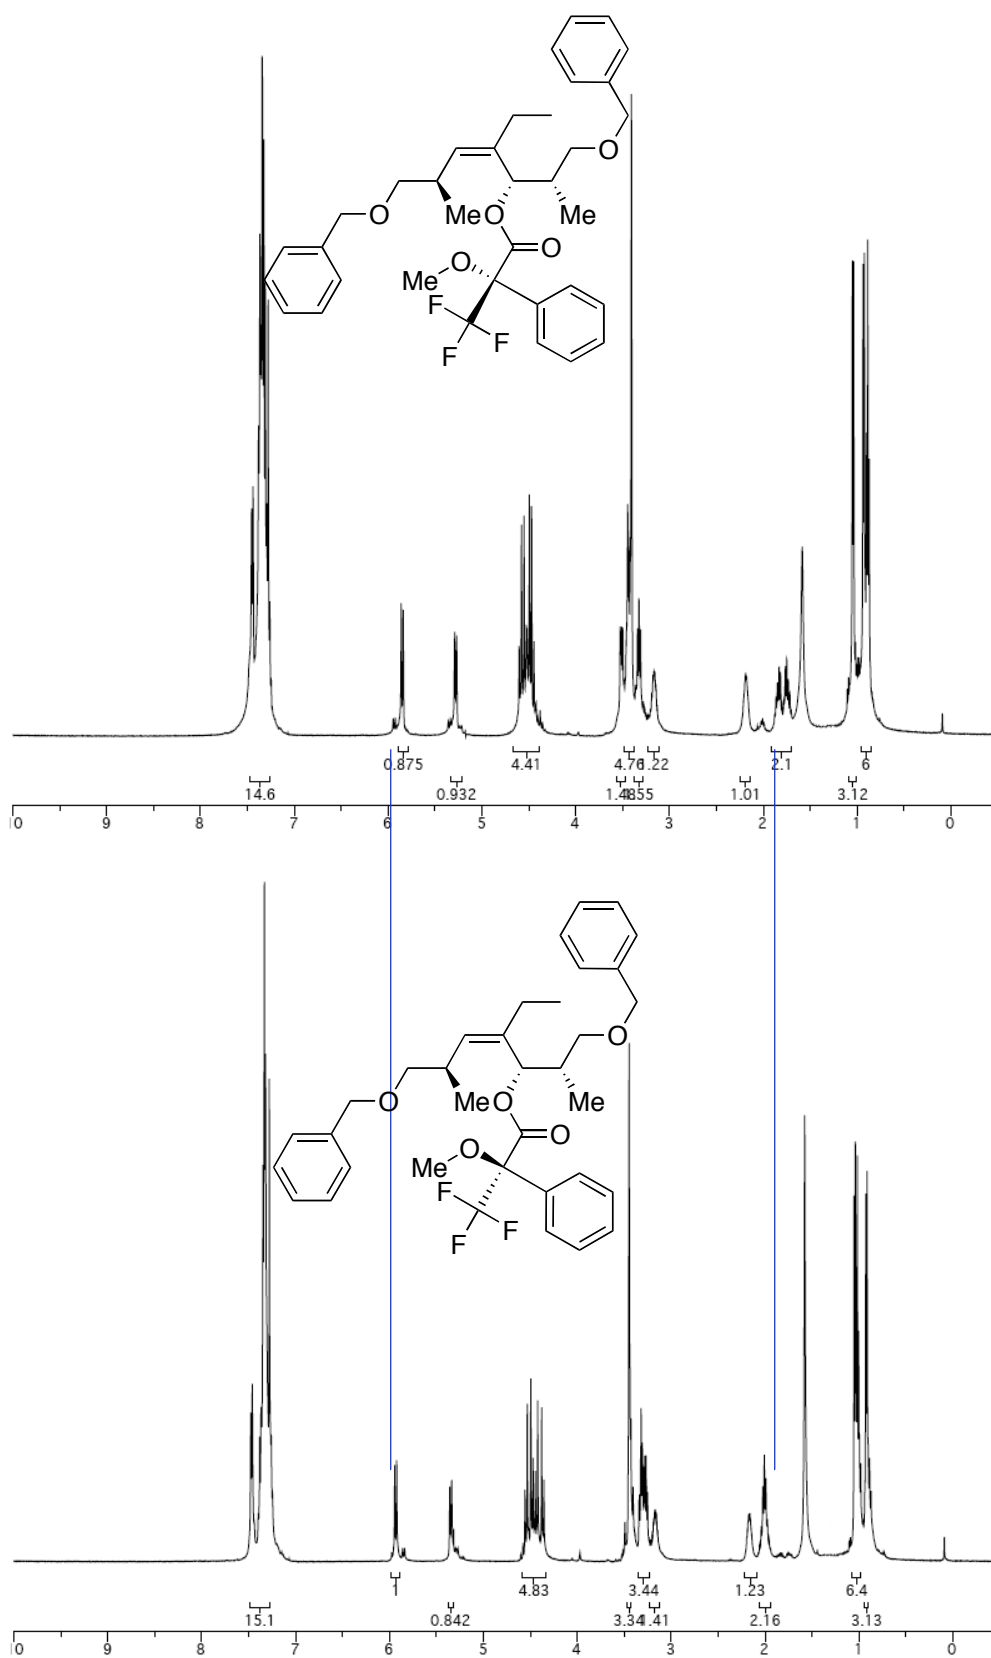

**Figure SI-35.** 500 MHz <sup>1</sup>H NMR of (*S*) and (*R*)-Mosher Ester of **33** in CDCl<sub>3</sub>.

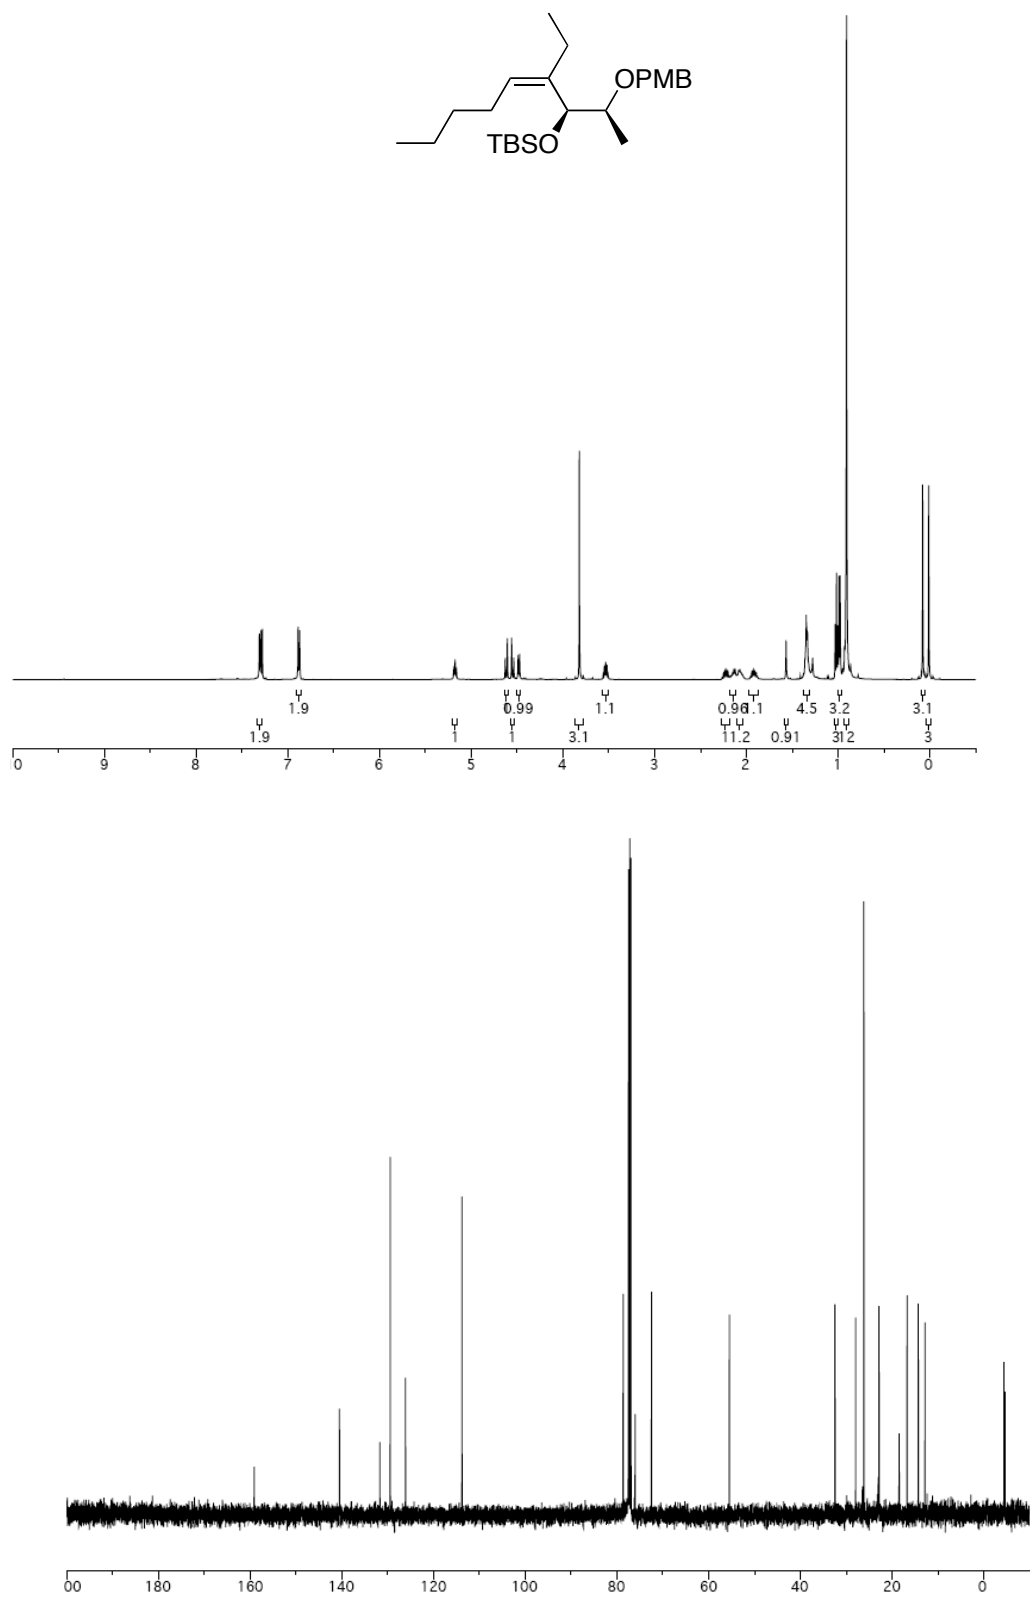

**Figure SI-36.** 500 MHz  $^1\text{H}$  and 125 MHz  $^{13}\text{C}$   $\{^1\text{H}\}$  NMR of **30a** in  $\text{CDCl}_3$ .



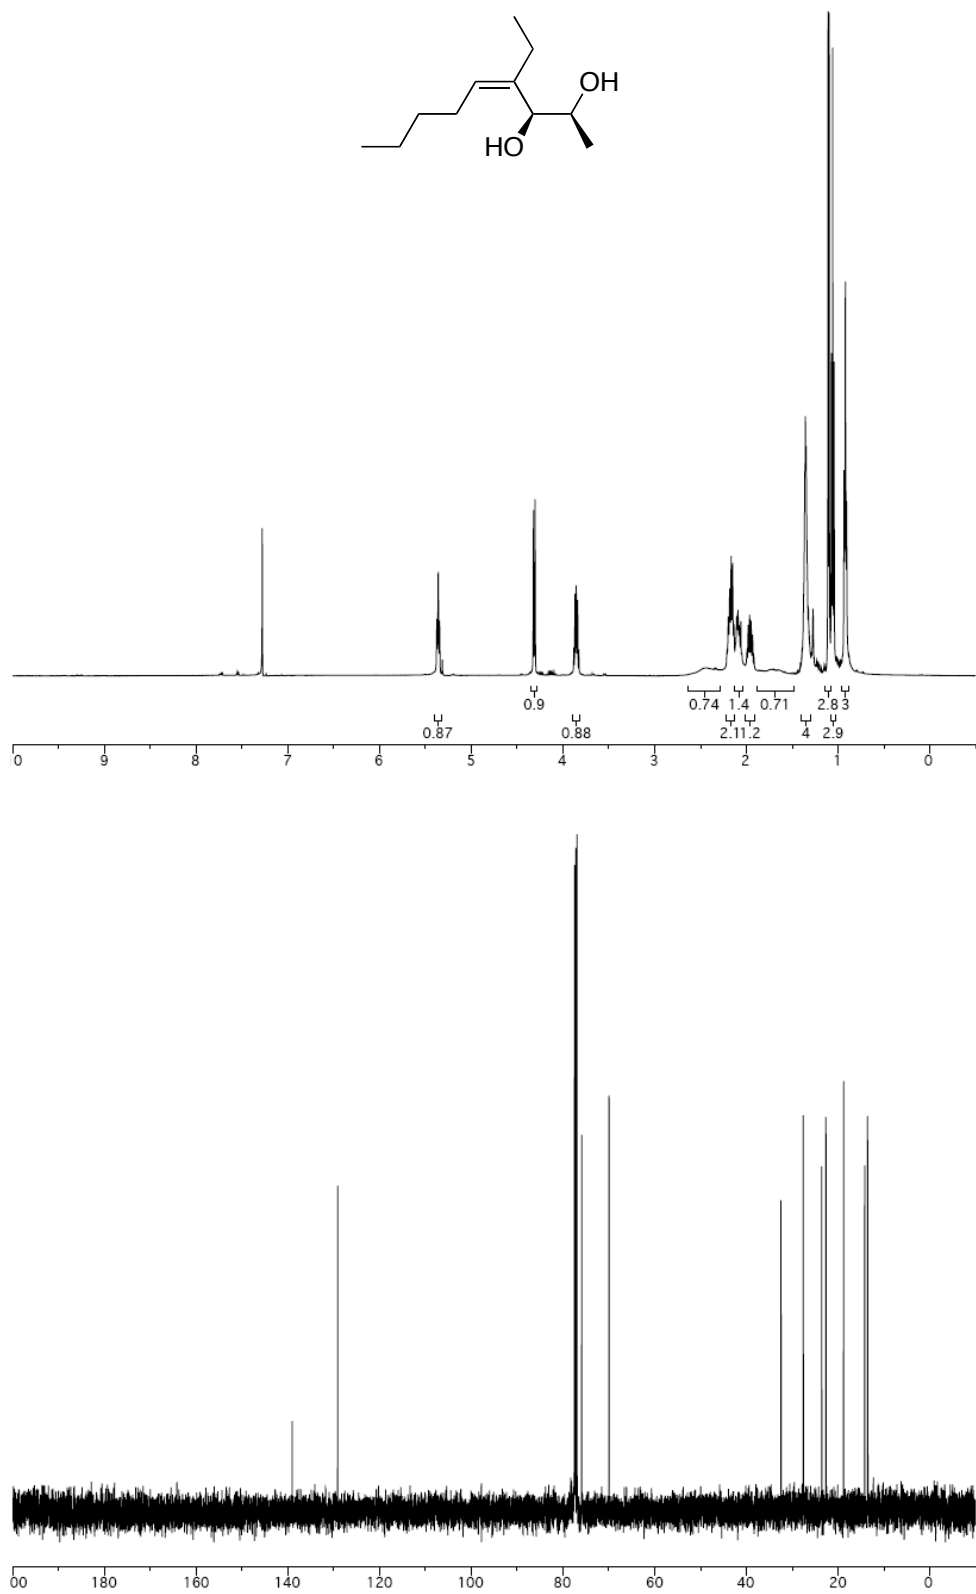

**Figure SI-38.** 500 MHz <sup>1</sup>H and 125 MHz <sup>13</sup>C {<sup>1</sup>H} NMR of **38** in CDCl<sub>3</sub>.

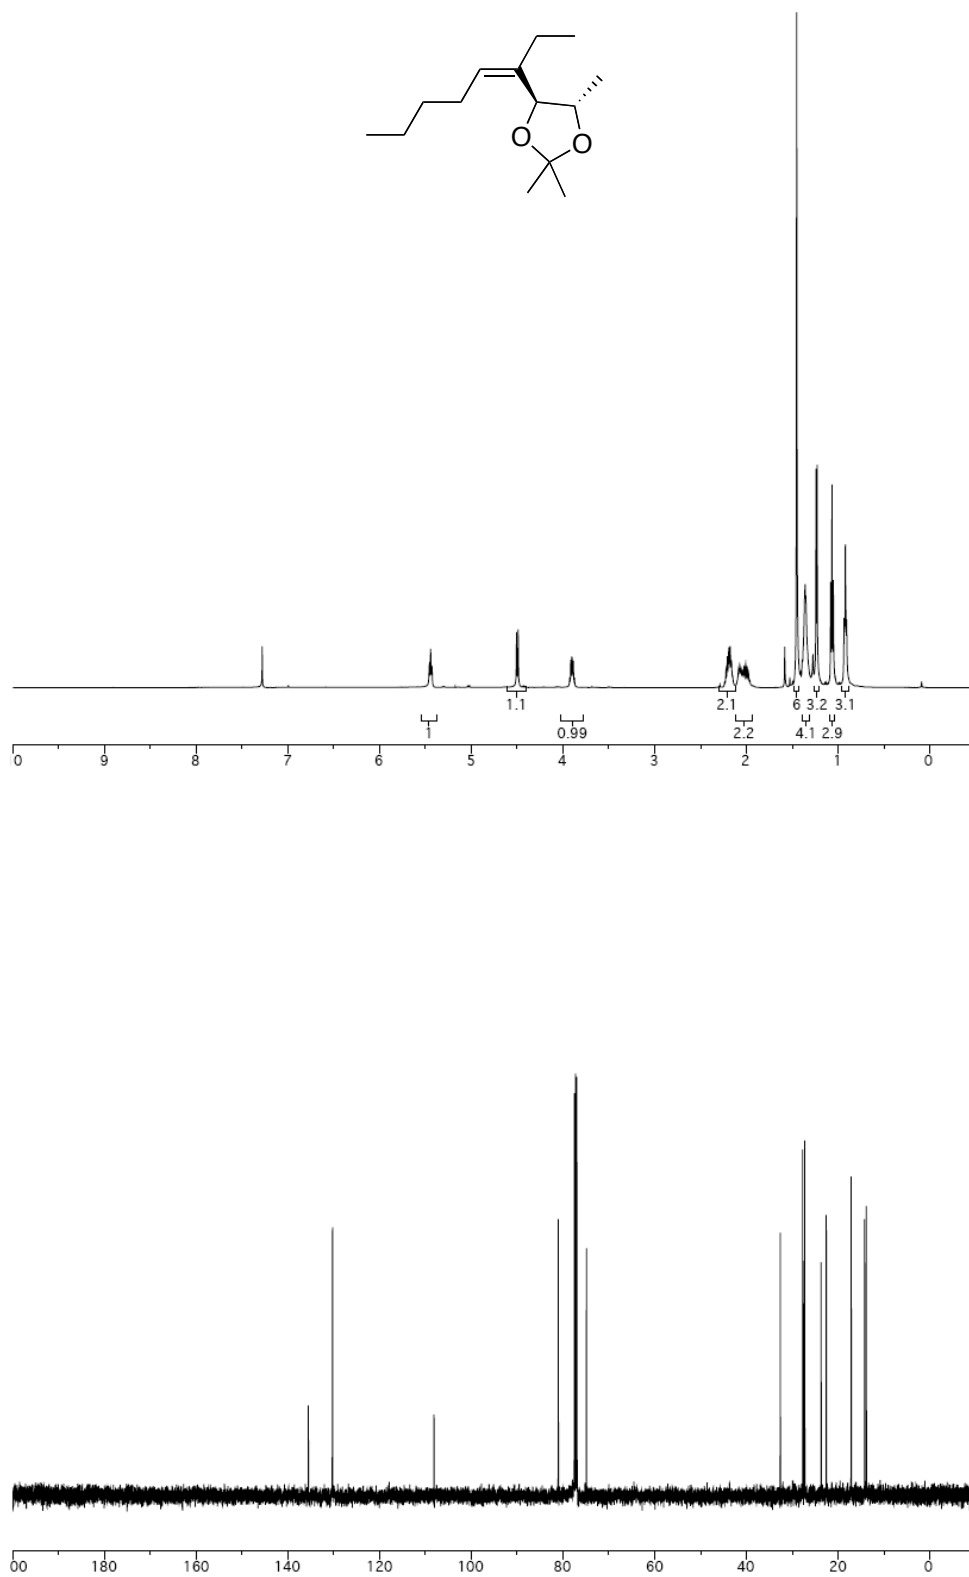

**Figure SI-39.** 500 MHz  $^1\text{H}$  and 125 MHz  $^{13}\text{C}$   $\{^1\text{H}\}$  NMR of **39** in  $\text{CDCl}_3$ .

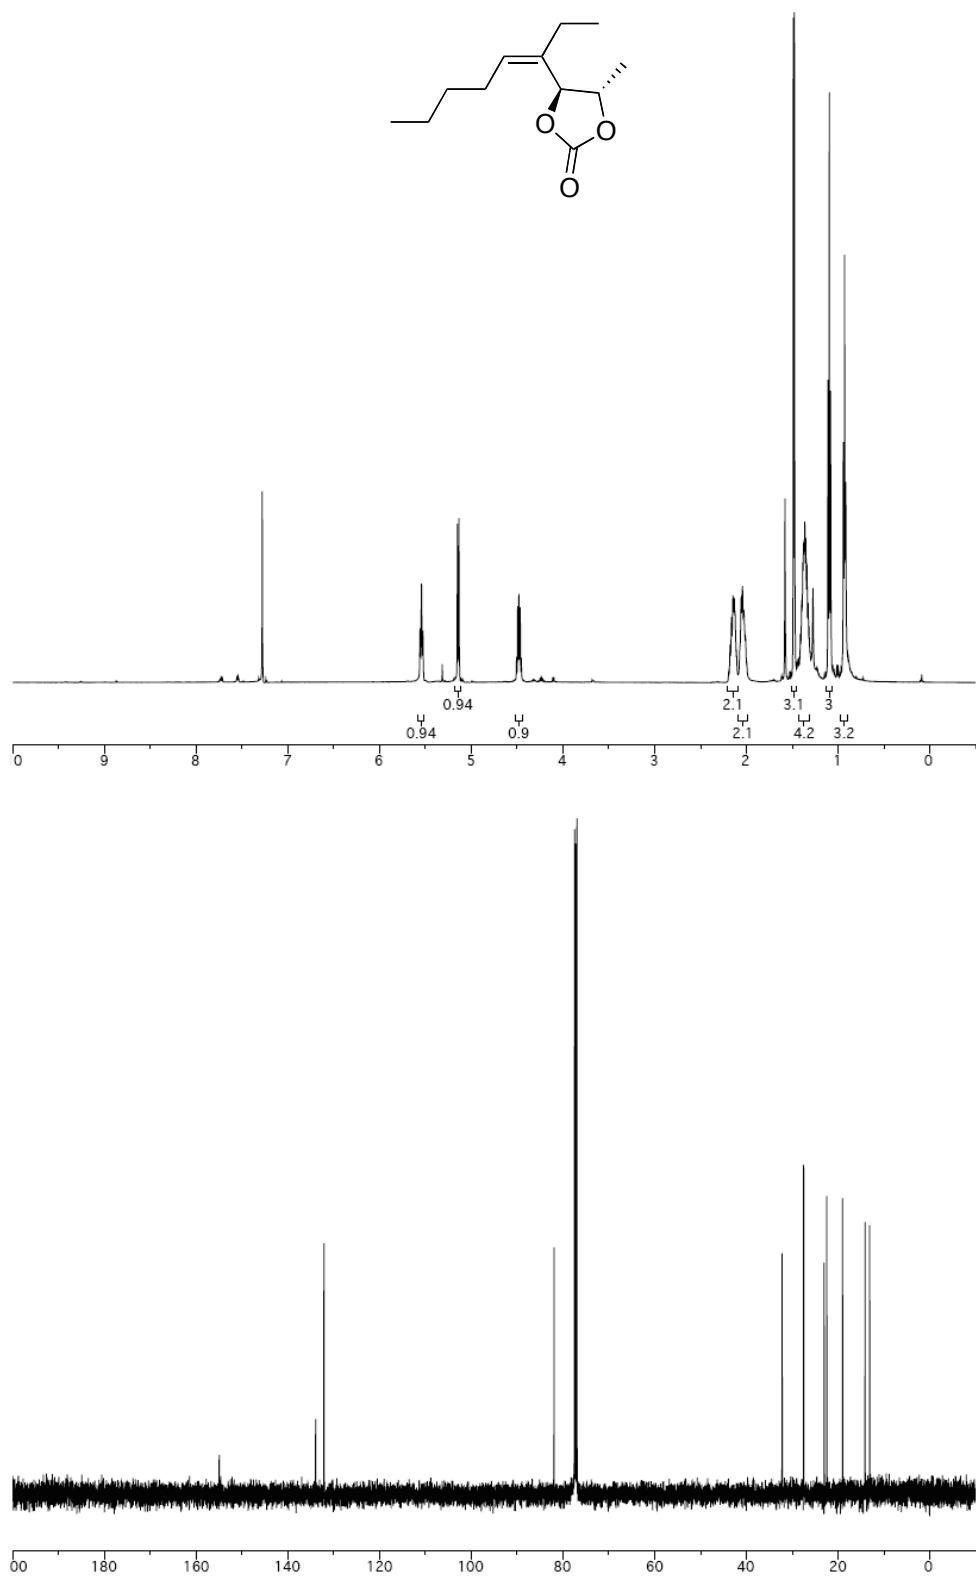

**Figure SI-40.** 500 MHz  $^1\text{H}$  and 125 MHz  $^{13}\text{C}$   $\{^1\text{H}\}$  NMR of **40** in  $\text{CDCl}_3$ .



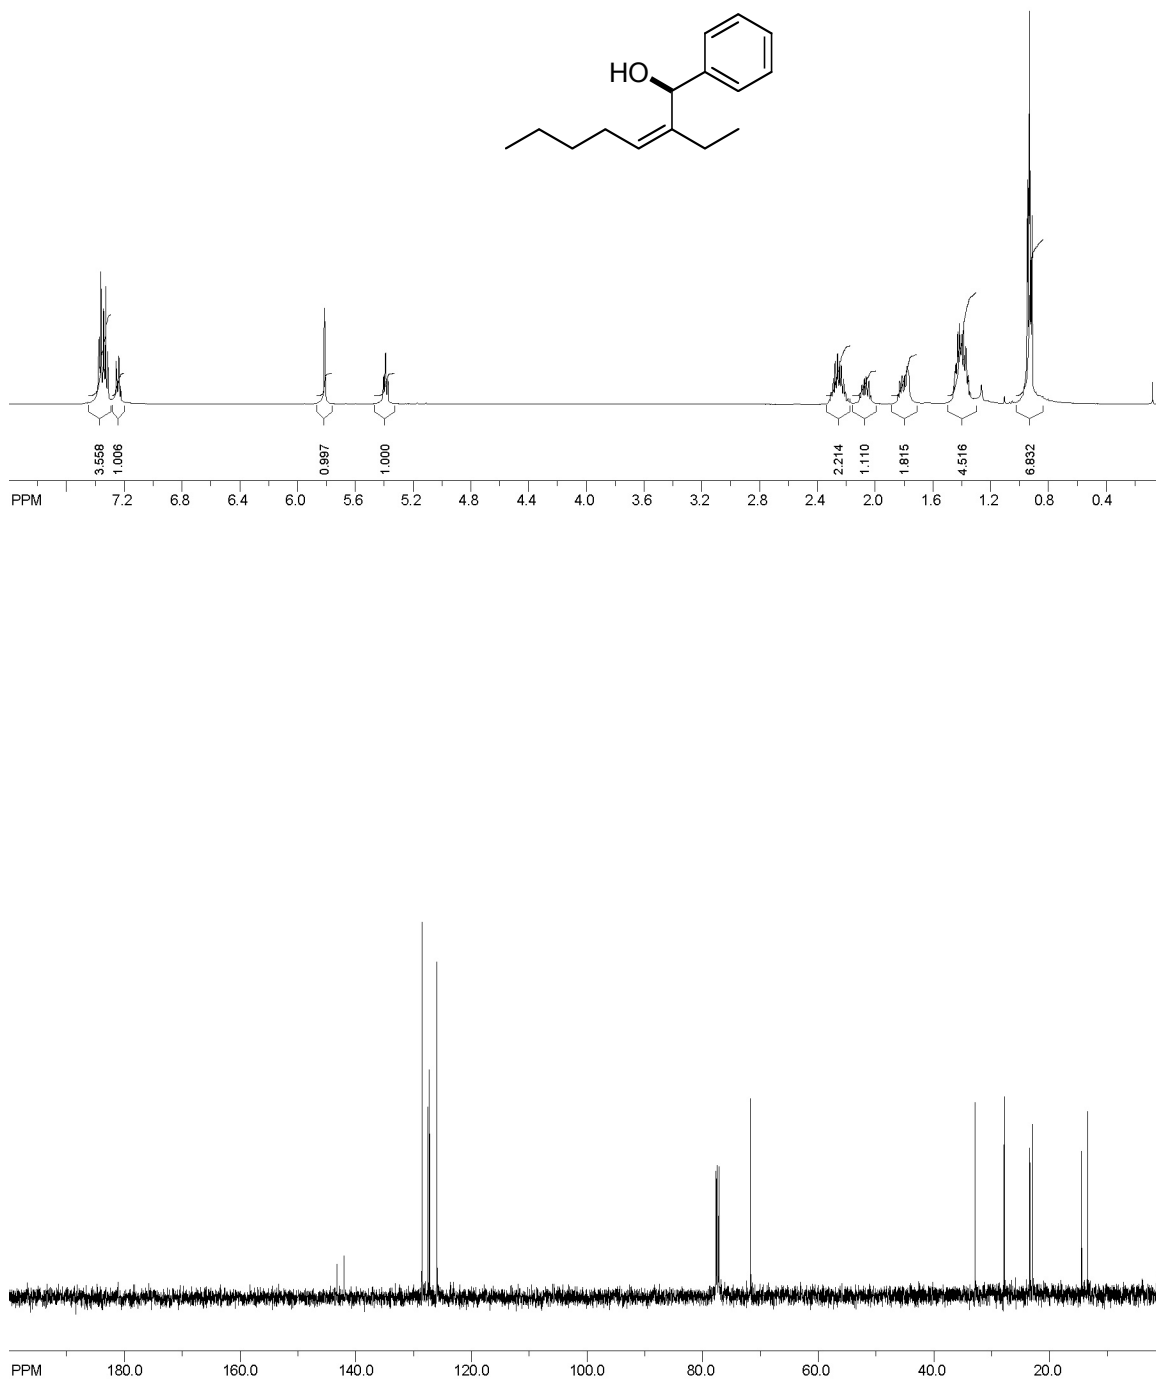

**Figure SI-41.** 500 MHz  $^1\text{H}$  and 125 MHz  $^{13}\text{C}\{^1\text{H}\}$  NMR of **51** in  $\text{CDCl}_3$ .

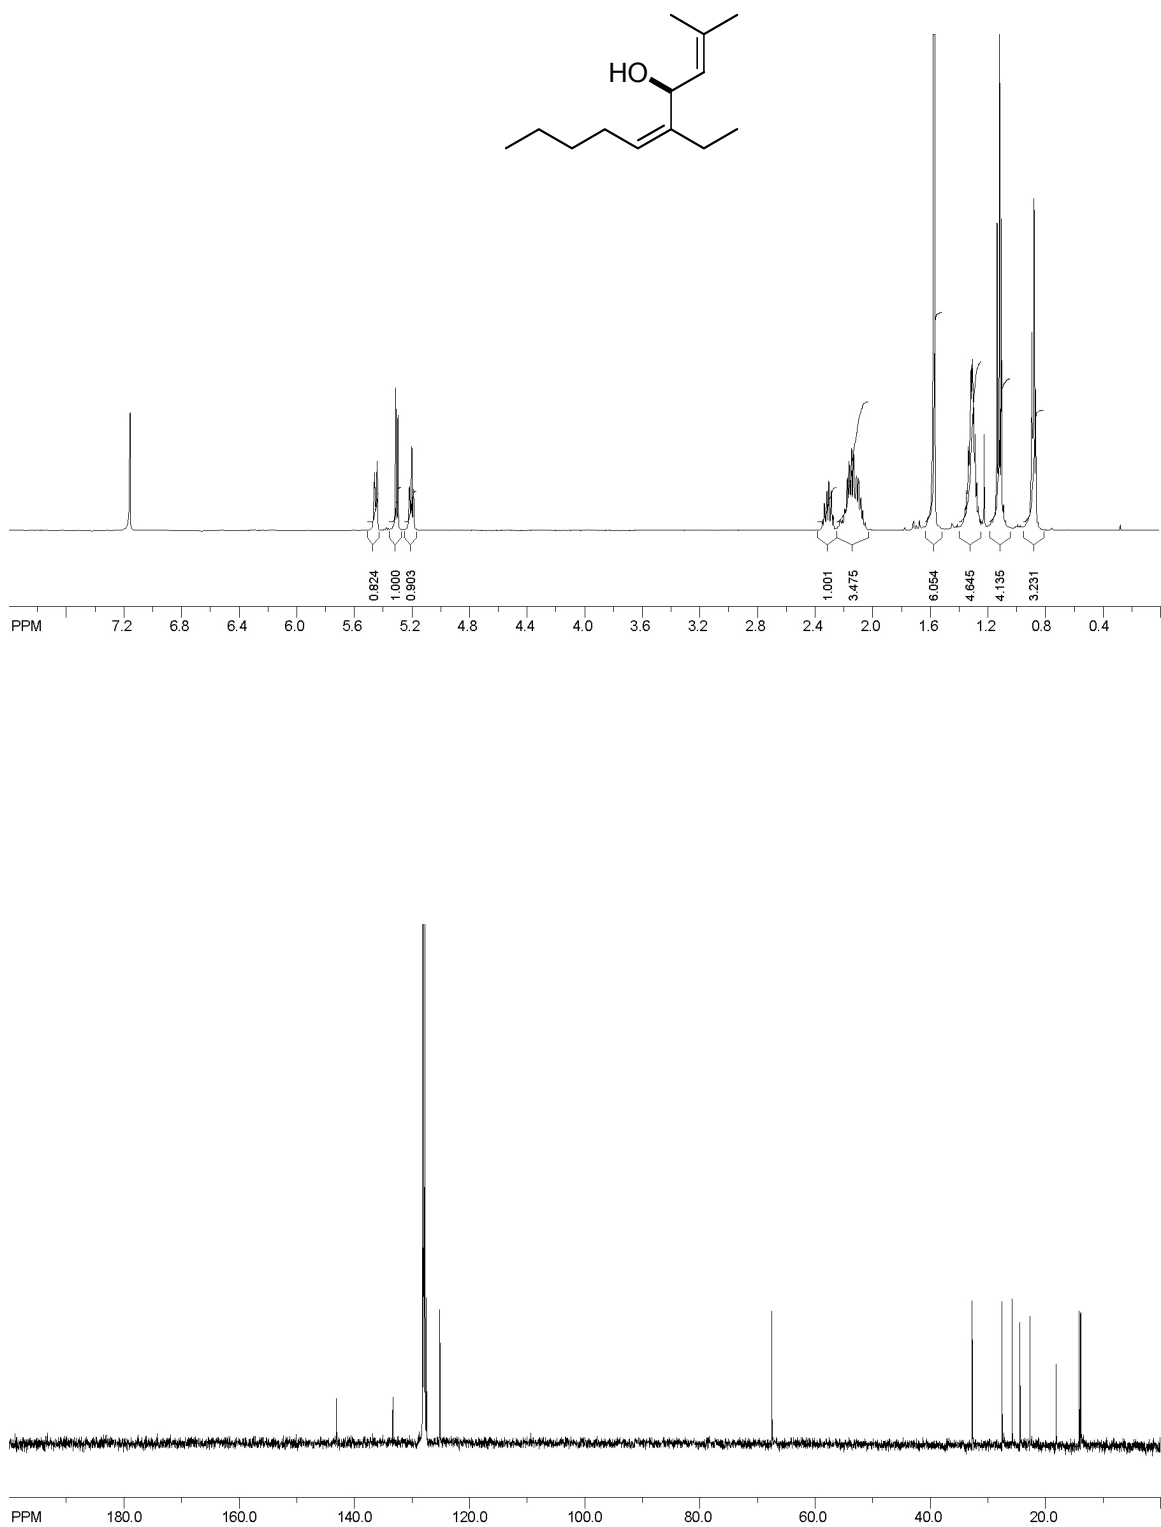

**Figure SI-42.** 500 MHz  $^1\text{H}$  and 125 MHz  $^{13}\text{C}\{^1\text{H}\}$  NMR of **52** in  $\text{C}_6\text{D}_6$ .

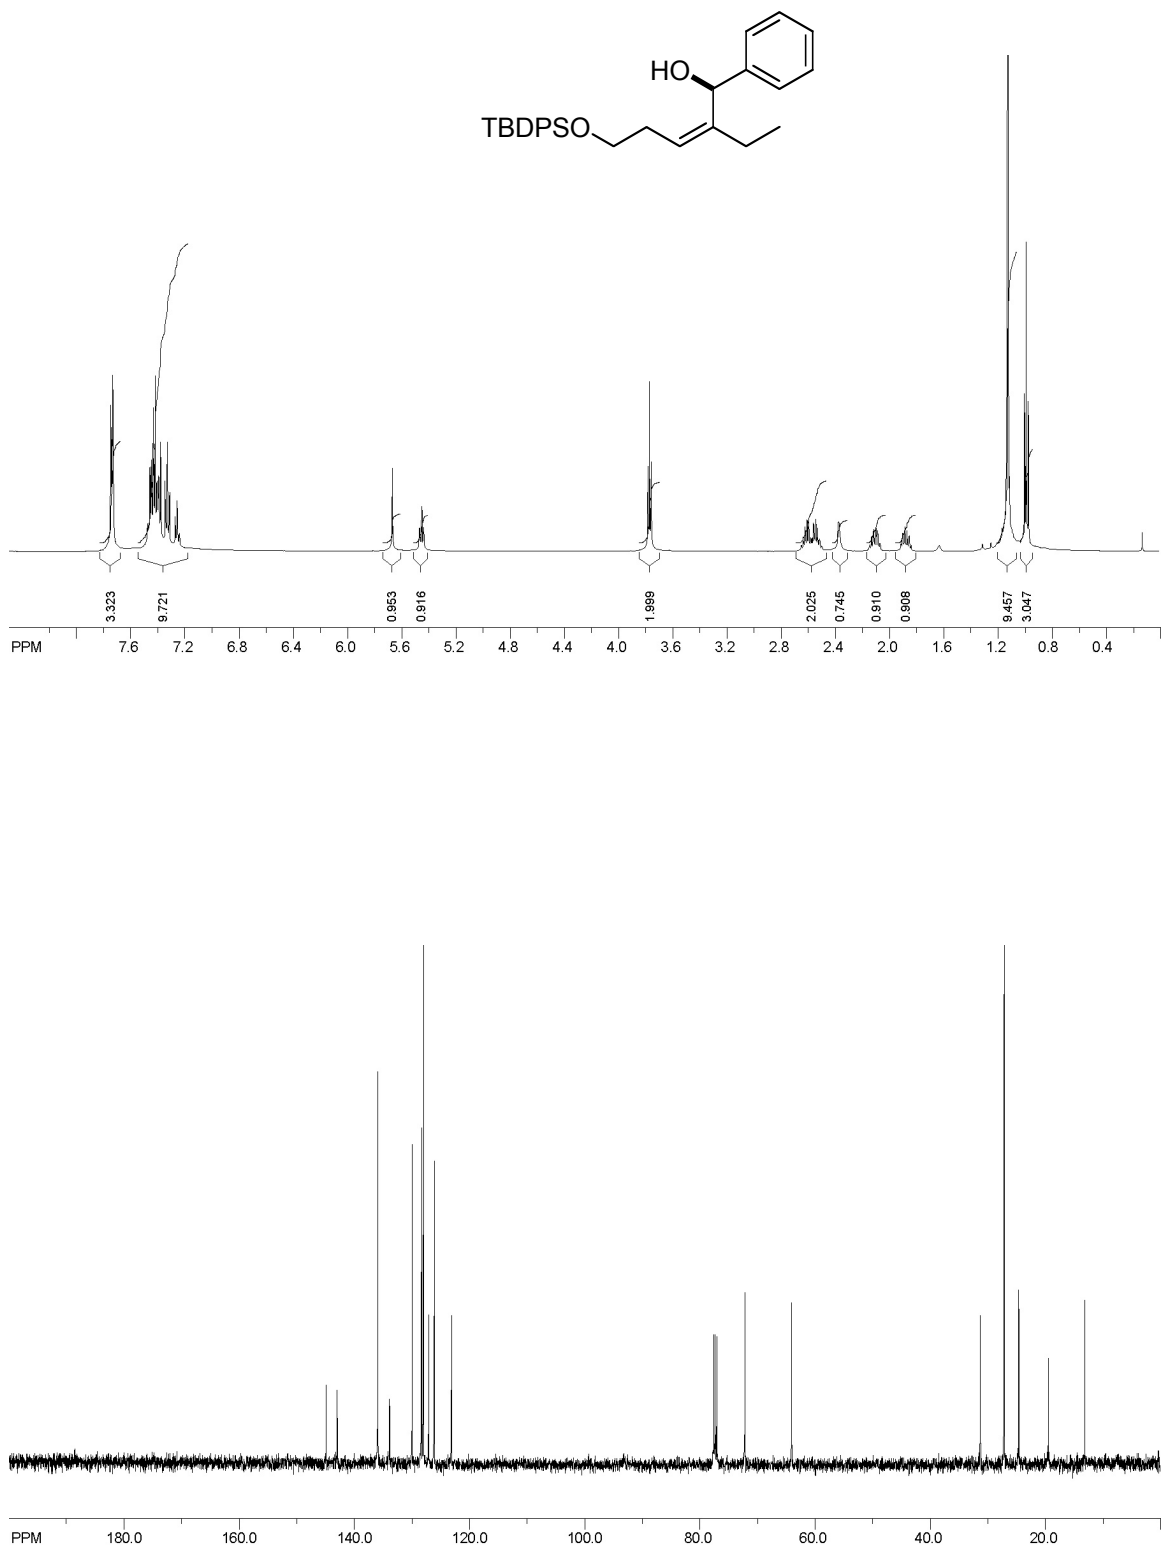

**Figure SI-43.** 500 MHz  $^1\text{H}$  and 125 MHz  $^{13}\text{C}\{^1\text{H}\}$  NMR of **53** in  $\text{CDCl}_3$ .



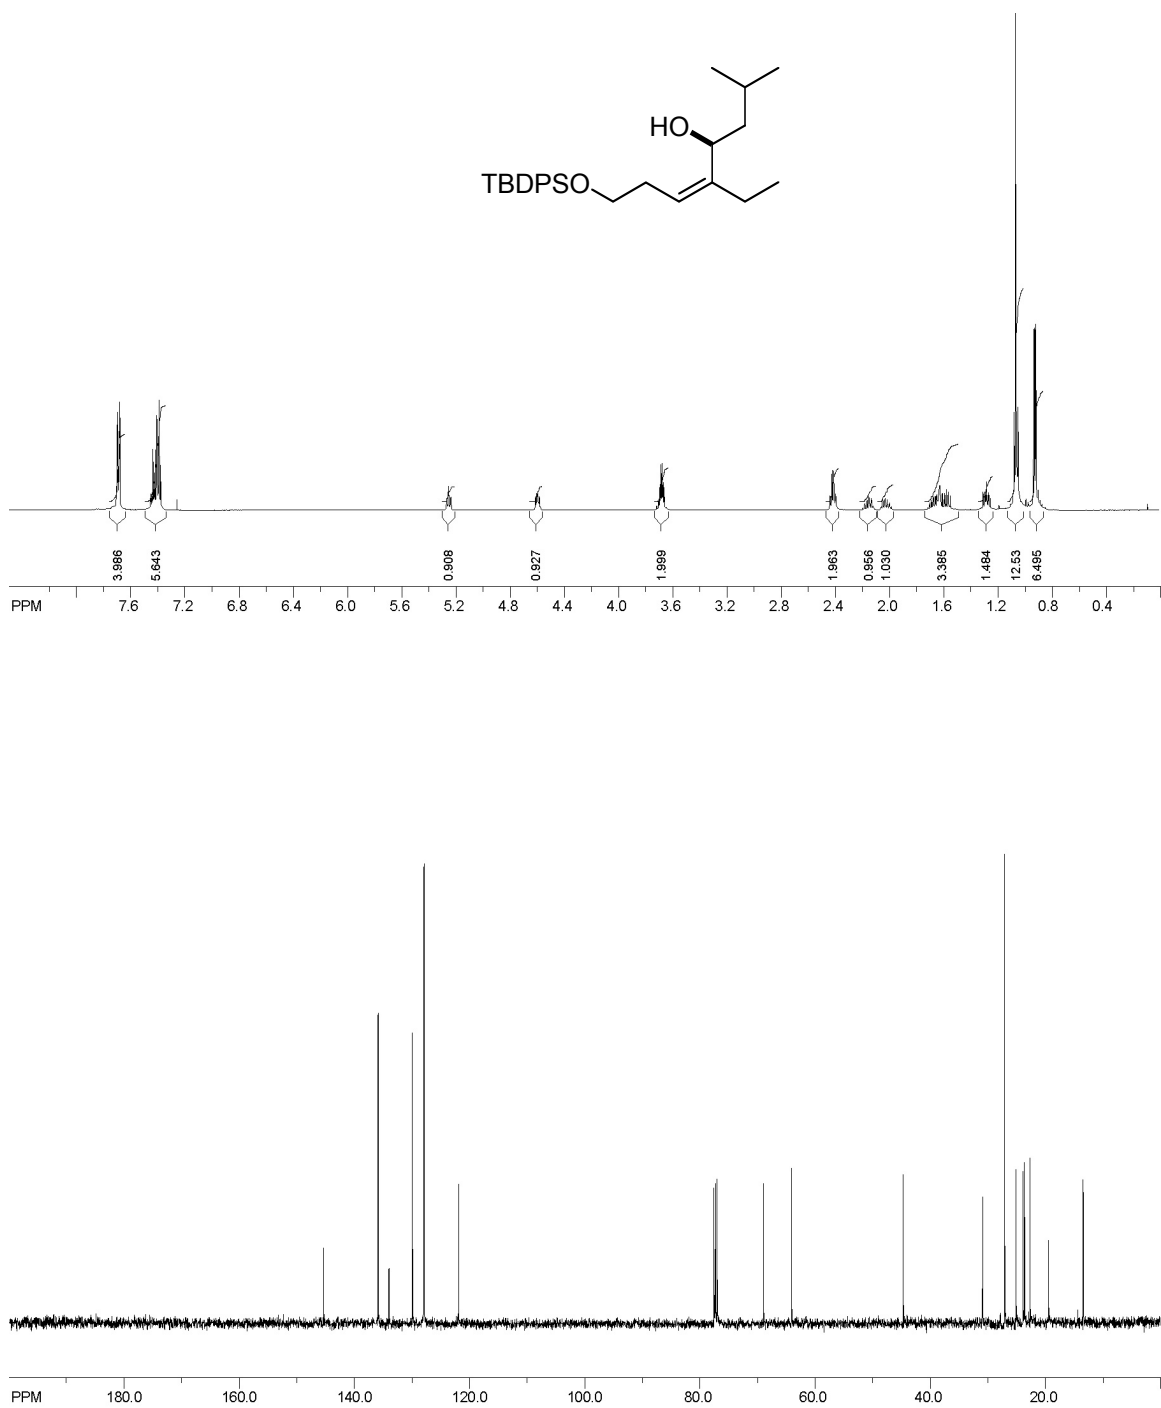

**Figure SI-45.** 500 MHz  $^1\text{H}$  and 125 MHz  $^{13}\text{C}\{^1\text{H}\}$  NMR of **55** in  $\text{CDCl}_3$ .

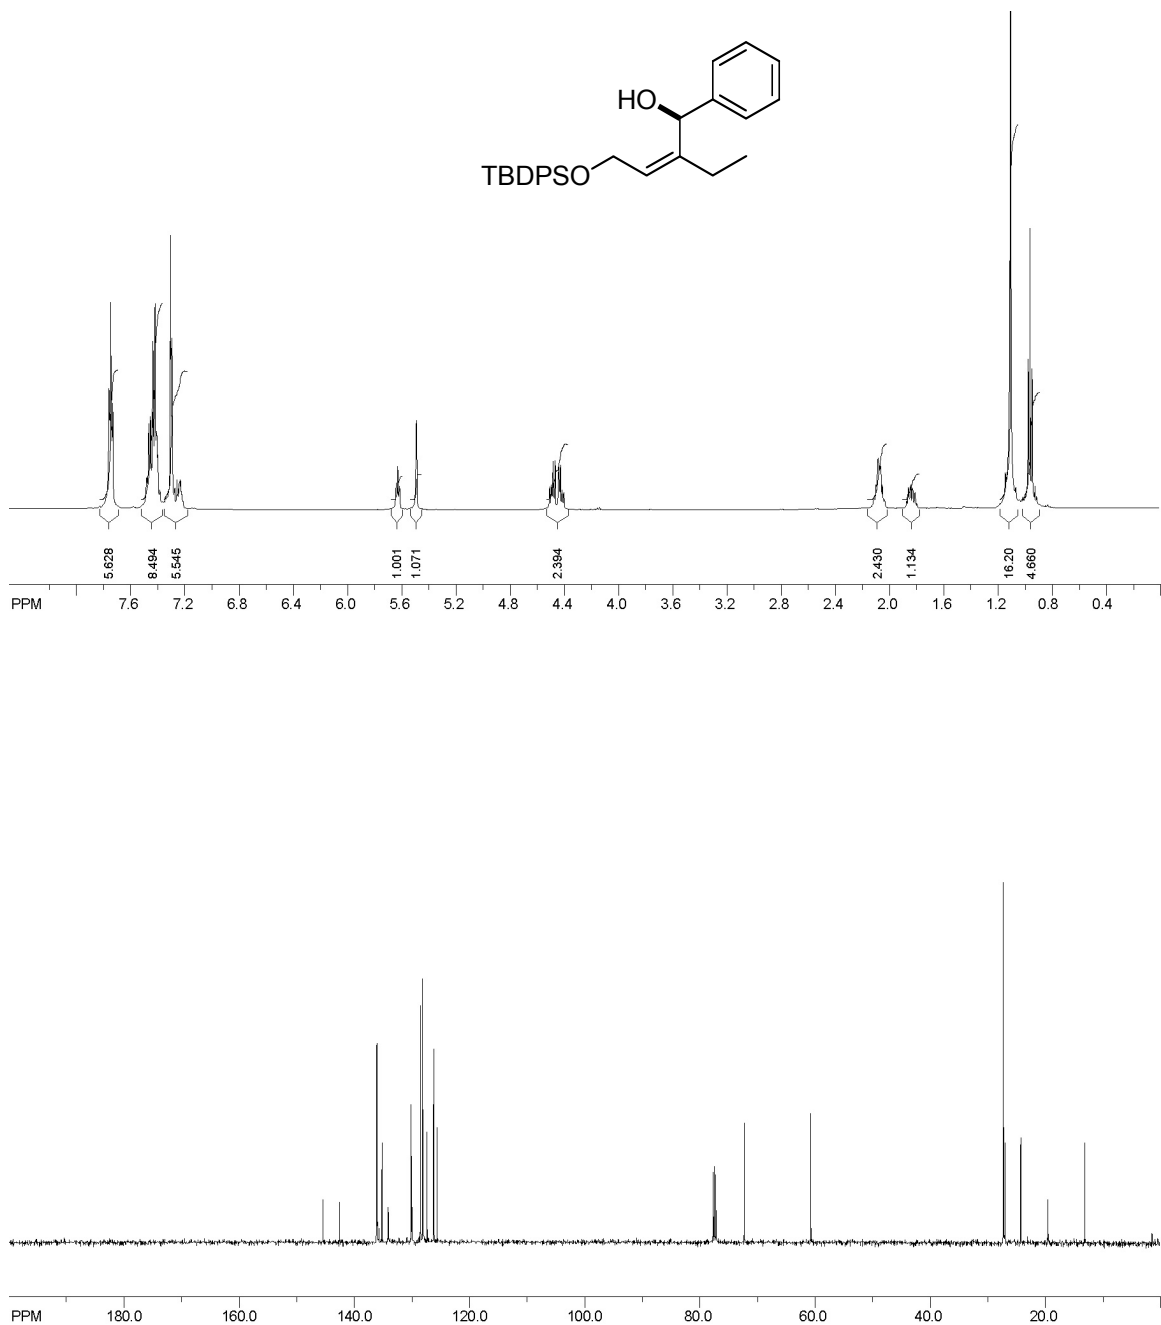

**Figure SI-46.** 500 MHz  $^1\text{H}$  and 125 MHz  $^{13}\text{C}\{^1\text{H}\}$  NMR of **56** in  $\text{CDCl}_3$ .

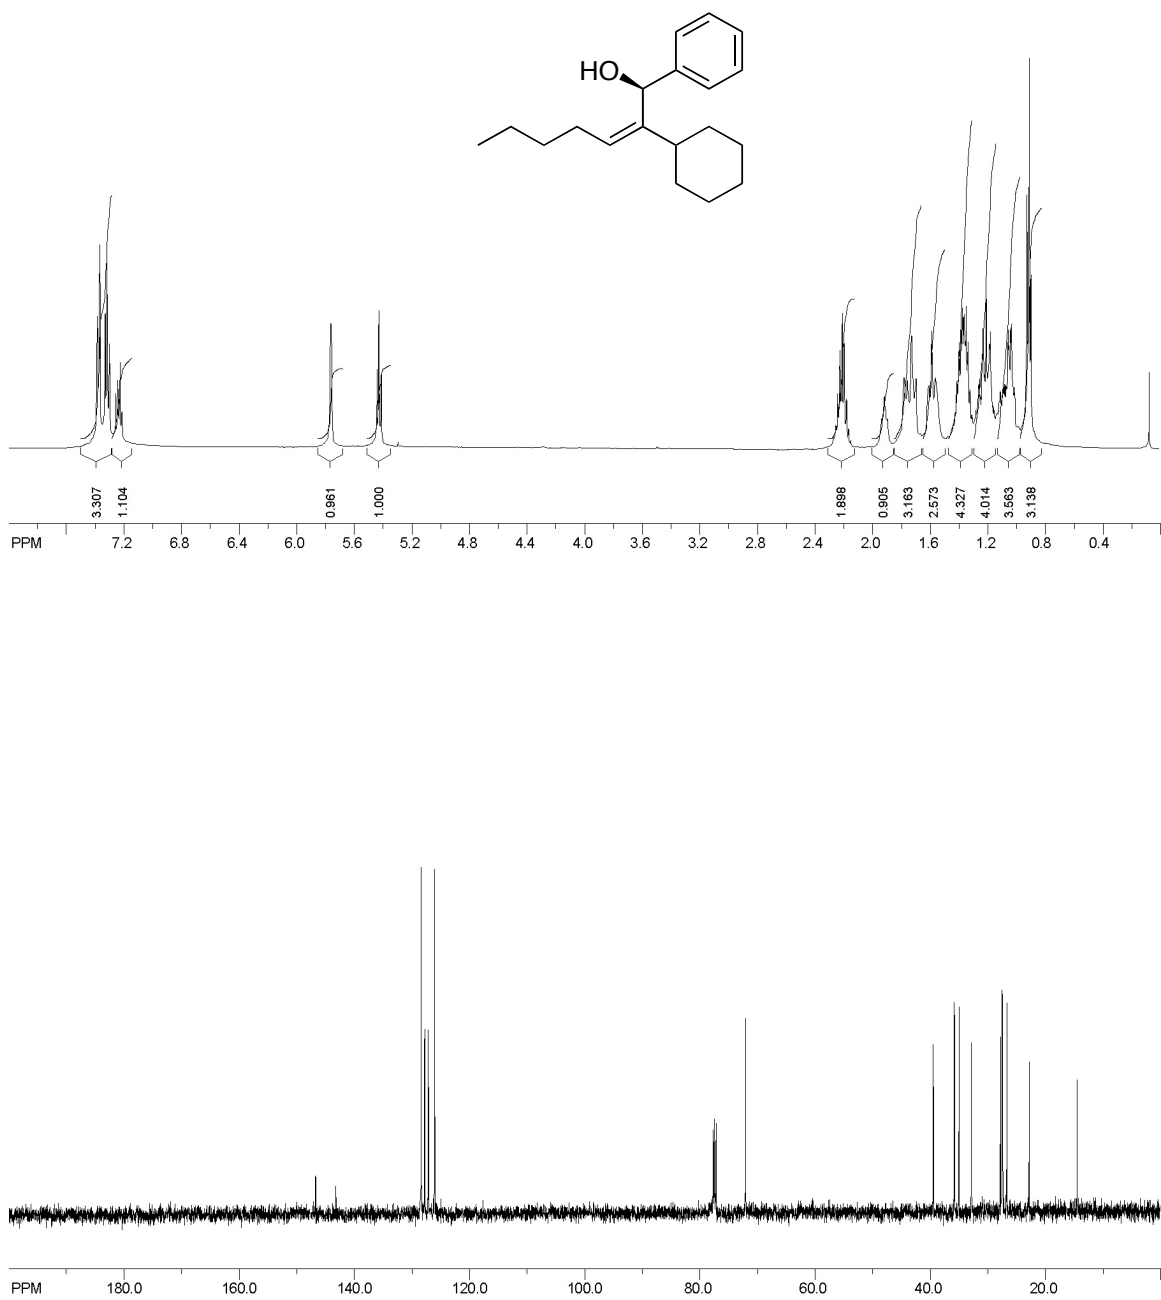

**Figure SI-47.** 500 MHz <sup>1</sup>H and 125 MHz <sup>13</sup>C{<sup>1</sup>H} NMR of **57** in CDCl<sub>3</sub>.





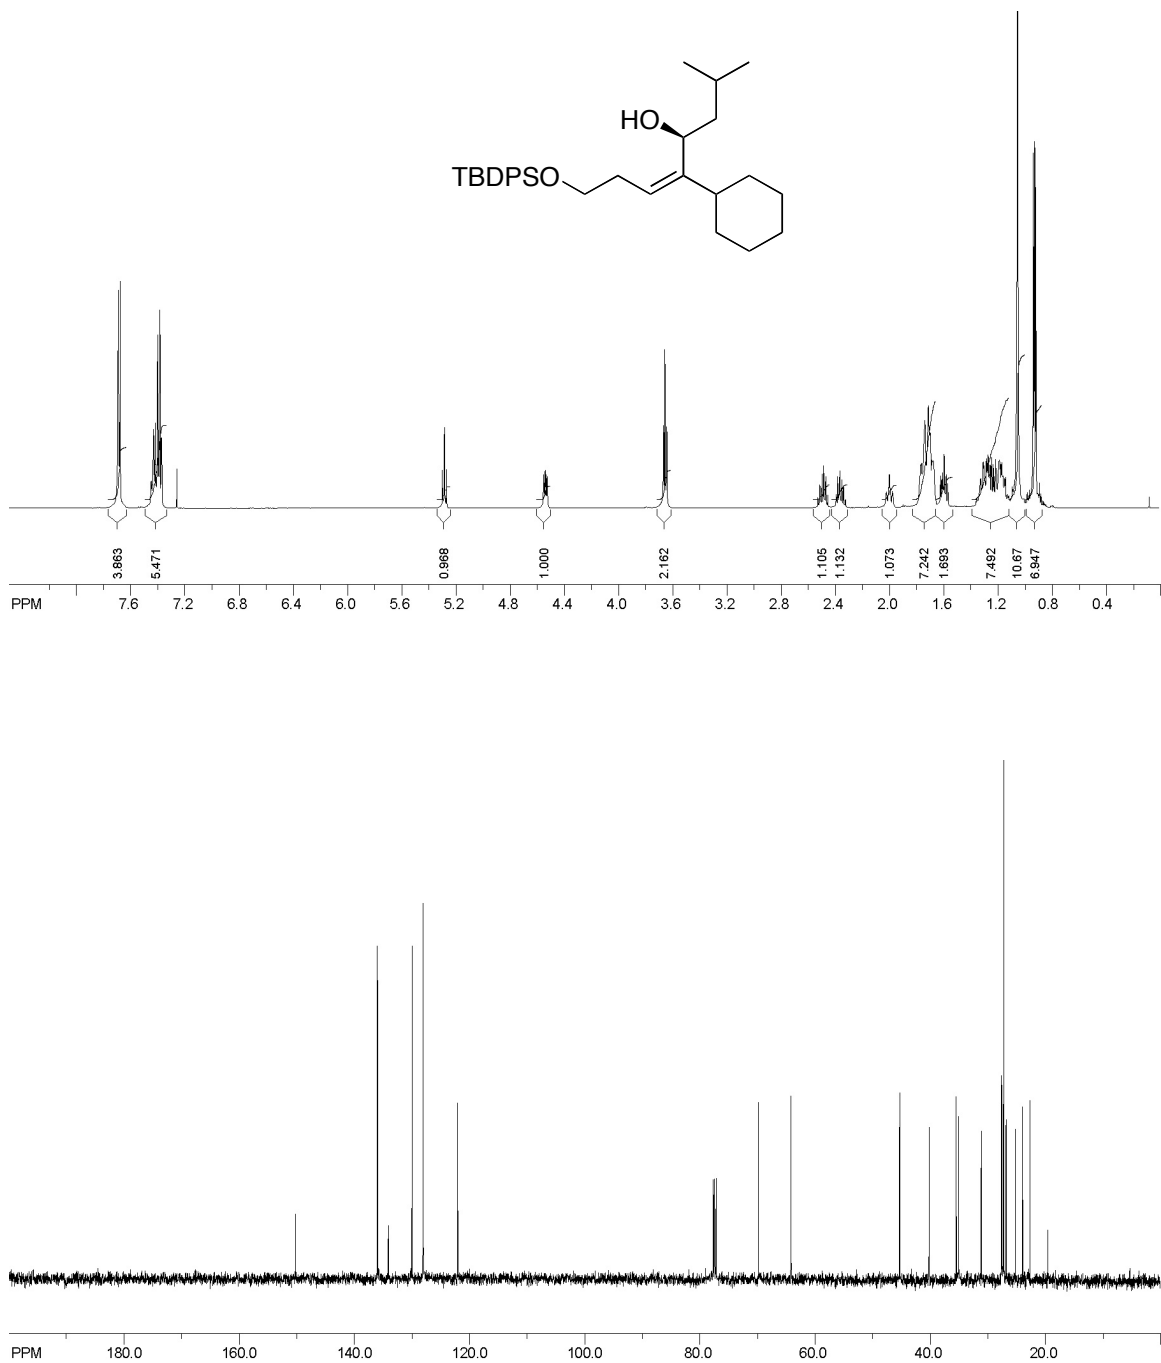

Figure SI-49. 500 MHz  $^1\text{H}$  and 125 MHz  $^{13}\text{C}\{^1\text{H}\}$  NMR of **59** in  $\text{CDCl}_3$ .
